# Supplementary material for: Ligand-Based Pharmacophore Modeling Using Novel 3D Pharmacophore Signatures
Source: MDPI journal article supplement (doi:10.3390/molecules23123094), 2018-11-27
Supplement: s1 [file s1]

# Ligand-based pharmacophore modeling using novel 3D pharmacophore signatures

Alina Kutlushina <sup>1</sup>, Aigul Khakimova <sup>1</sup>, Timur Madzhidov <sup>1</sup>, Pavel Polishchuk <sup>2,\*</sup>

<sup>1</sup> A.M. Butlerov Institute of Chemistry, Kazan Federal University, Kremlevskaya Str. 18, Kazan, Russia

<sup>2</sup> Institute of Molecular and Translational Medicine, Faculty of Medicine and Dentistry, Palacký University and University Hospital in Olomouc, Hnevotinska 5, 77900 Olomouc, Czech Republic

\* Correspondence: pavlo.polishchuk@upol.cz; Tel.: +420 585632298

## Supporting materials

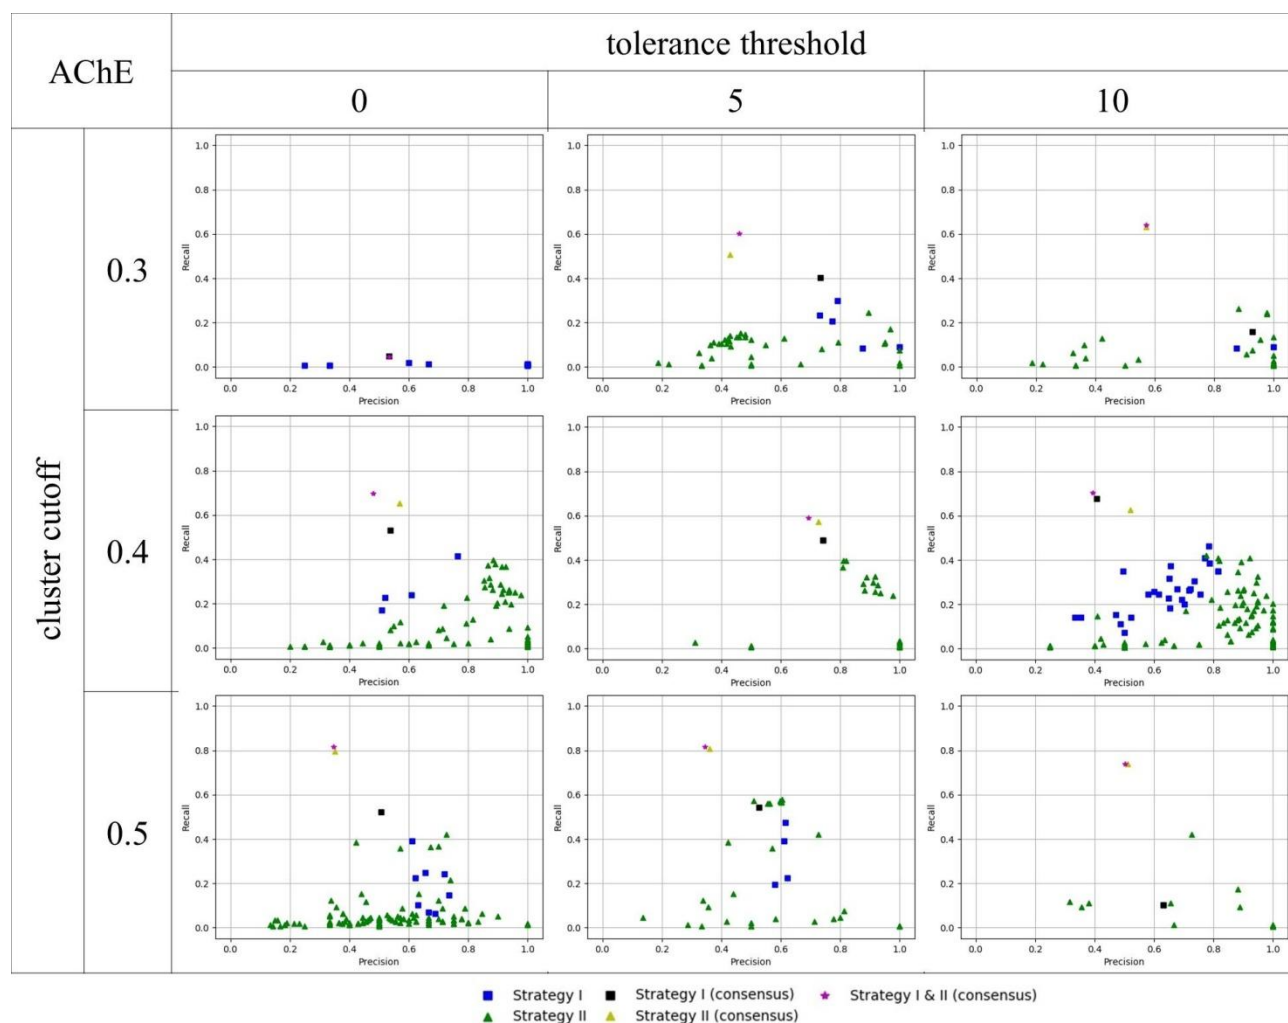

Figure S1. Precision-recall plot of 3D ligand-based pharmacophore models built on AChE inhibitors.

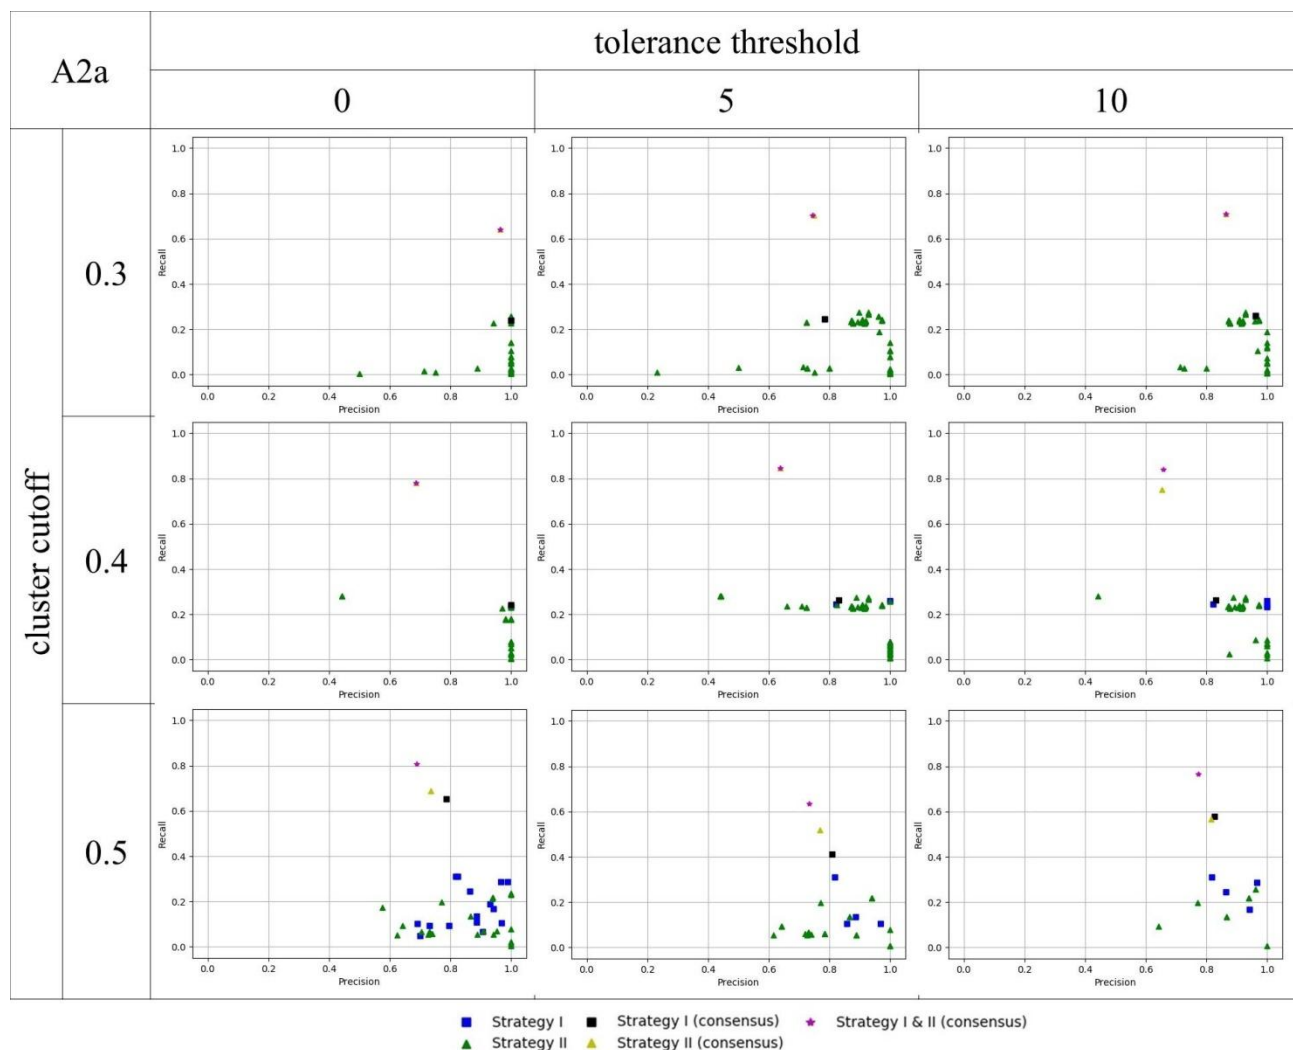

Figure S2. Precision-recall plot of 3D ligand-based pharmacophore models built on adenosine 2a antagonists.

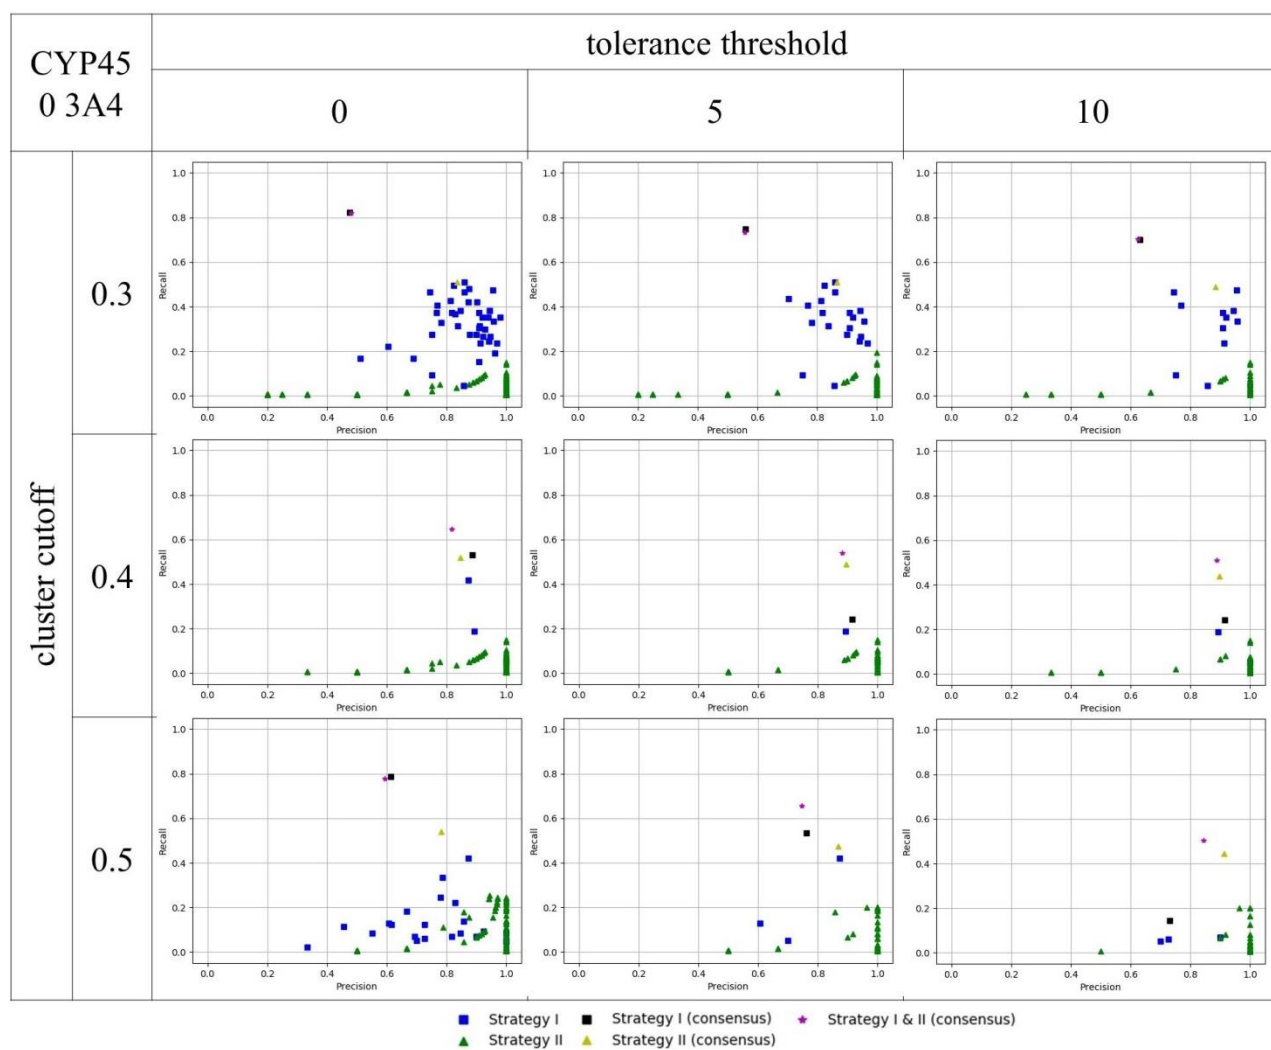

Figure S3. Precision-recall plot of 3D ligand-based pharmacophore models built on CYP450 3A4 inhibitors.

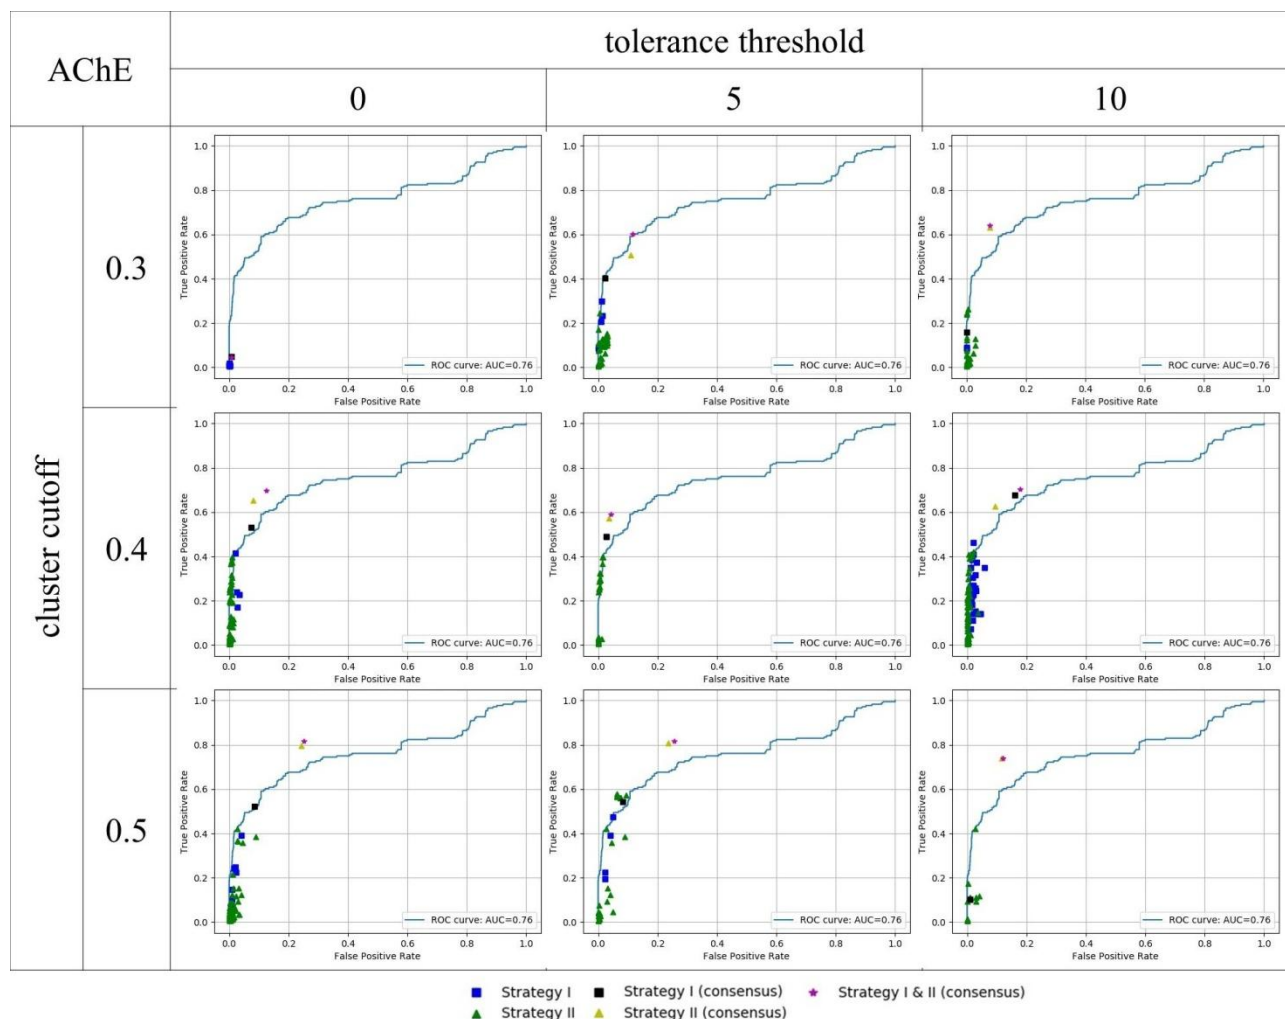

Figure S4. Performance of 3D ligand-based pharmacophore models built on AChE inhibitors and comparison with the best result of similarity search based on 2D pharmacophore fingerprints.

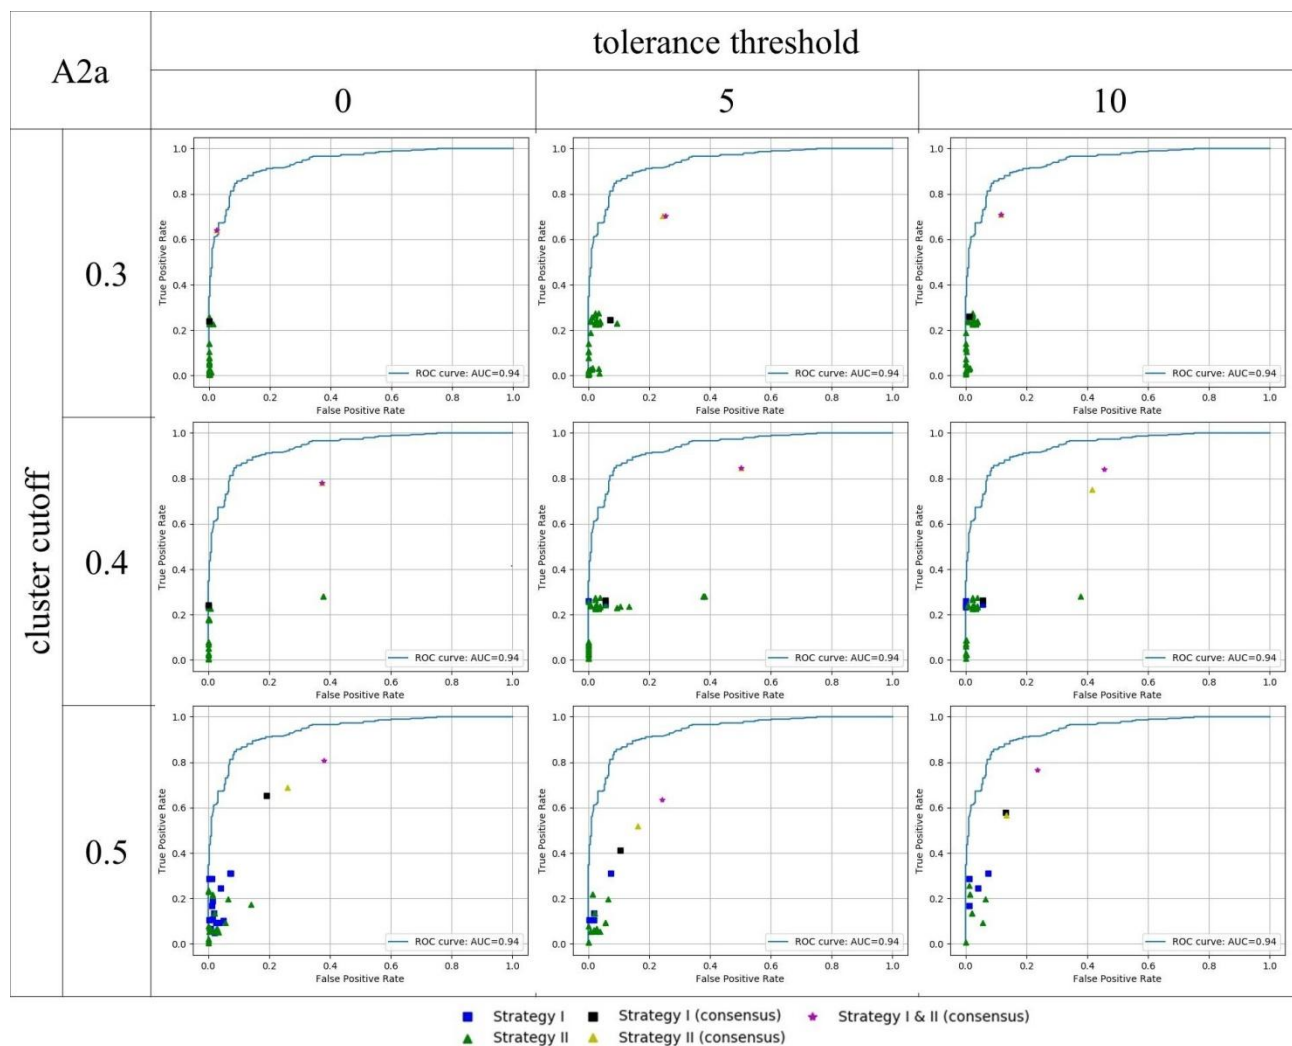

Figure S5. Performance of 3D ligand-based pharmacophore models built on adenosine 2a antagonists and comparison with the best result of similarity search based on 2D pharmacophore fingerprints.

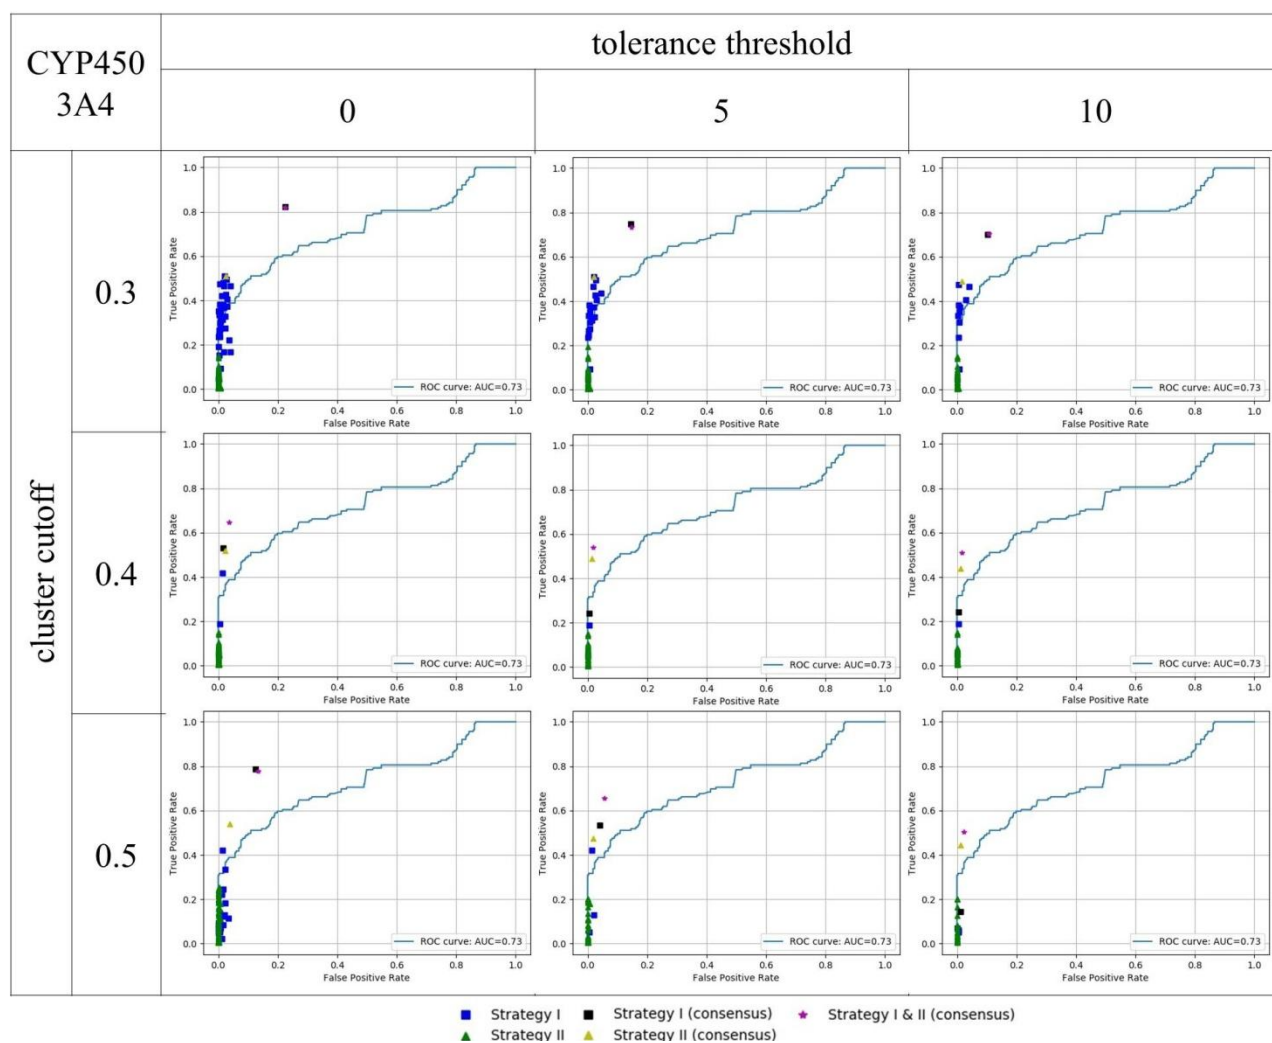

Figure S6. Performance of 3D ligand-based pharmacophore models built on CYP450 3A4 inhibitors and comparison with the best result of similarity search based on 2D pharmacophore fingerprints.
