# Supplementary material for: Ligand-Based Pharmacophore Modeling Using Novel 3D Pharmacophore Signatures
Source: Molecules. 2018 Nov 27;23(12):3094. doi: 10.3390/molecules23123094 (PMC6321403; doi:10.3390/molecules23123094)
Supplement: Supplementary file 1 [file molecules-23-03094-s001.zip]

Archive with 4 entries (4 files):
- a2a.smi
- ache.smi
- cyp3a4.smi
- si.pdf
