# Supplementary material for: Ligand-Based Pharmacophore Modeling Using Novel 3D Pharmacophore Signatures
Source: Molecules. 2018 Nov 27;23(12):3094. doi: 10.3390/molecules23123094 (PMC6321403; doi:10.3390/molecules23123094)
Supplement: Supplementary file 1 [file molecules-23-03094-s001.zip › a2a.smi]

Nc1nc2c(cnn2CCc2ccccc2)c2nc(-c3ccco3)nn12	CHEMBL17127	1
CCCn1c(=O)c2[nH]c(-c3ccc(OCC(=O)NCCN)cc3)nc2n(CCC)c1=O	CHEMBL273094	1
CCCSc1c2c(nc(N)n3nc(-c4ccco4)nc23)nn1C	CHEMBL280888	1
COc1ccc(NC(=O)Nc2nc3nn(C)c(SC)c3c3nc(-c4ccco4)nn23)cc1	CHEMBL22113	1
CCNc1c2c(nc(NC(=O)Nc3ccc(OC)cc3)n3nc(-c4ccco4)nc23)nn1C	CHEMBL554955	1
CSc1c2c(nc(NC(=O)Cc3ccc4c(c3)OCO4)n3nc(-c4ccco4)nc23)nn1C	CHEMBL21572	1
CSc1c2c(nc(N)n3nc(-c4ccco4)nc23)nn1C	CHEMBL281129	1
CCNc1c2c(nc(N)n3nc(-c4ccco4)nc23)nn1C	CHEMBL544678	1
Nc1nc(NCCc2ccc(O)cc2)nc2nc(-c3ccco3)nn12	CHEMBL113142	1
CCCn1c(=O)c2[nH]c(-c3ccc(OCC(=O)Nc4ccc(C(N)=O)cc4)cc3)nc2n(CCC)c1=O	CHEMBL275360	1
CCCn1c(=O)c2[nH]c(-c3ccc(OCC(=O)Nc4cccc(C(C)=O)c4)cc3)nc2n(CCC)c1=O	CHEMBL16534	1
CCCn1c(=O)c2[nH]c(-c3ccc(OCC(=O)Nc4ccccc4)cc3)nc2n(CCC)c1=O	CHEMBL16677	1
CCCn1c(=O)c2[nH]c(-c3ccc(OCC(=O)Nc4ccc(F)cc4)cc3)nc2n(CCC)c1=O	CHEMBL16929	1
CCCn1c(=O)c2[nH]c(-c3ccc(OCC(=O)Nc4ccc([N+](=O)[O-])cc4)cc3)nc2n(CCC)c1=O	CHEMBL16787	1
CCCn1c(=O)c2[nH]c(-c3ccc(OCC(=O)NCc4ccccc4)cc3)nc2n(CCC)c1=O	CHEMBL275605	1
CCCn1c(=O)c2[nH]c(-c3ccc(OCC(=O)Nc4ccc(C(=O)O)cc4)cc3)nc2n(CCC)c1=O	CHEMBL16931	1
CCCCc1nc(N)c2nc(-n3nccn3)n(C)c2n1	CHEMBL197669	1
CCn1c(=O)c2c(nc(/C=C/c3ccc(OC)c(OC)c3)n2C)n(CC)c1=O	CHEMBL431770	1
Cn1c(=O)c2[nH]c(-c3ccc(OCC(=O)Nc4ccc(C#N)cc4)cc3)cc2n(C)c1=O	CHEMBL382135	1
Cn1c(=O)c2[nH]c(-c3ccc(OCC(=O)Nc4ccc(F)cc4)cc3)cc2n(C)c1=O	CHEMBL199446	1
CCCn1cnc2c1nc(N)n1nc(-c3ccco3)nc21	CHEMBL248298	1
COCCOc1ccc(N2CCN(CCn3cnc4c3nc(N)n3nc(-c5cccc[n+]5[O-])nc43)CC2)cc1	CHEMBL392386	1
COCCOc1ccc(N2CCN(CCn3cnc4c3nc(N)n3nc(-c5ccccn5)nc43)CC2)cc1	CHEMBL246675	1
C=c1ccccc1=C1N=C2c3ncn(CCN4CCN(c5ccc(OCCOC)cc5)CC4)c3N=C(N)N2N1	CHEMBL246674	1
COCCOc1ccc(N2CCN(CCn3cnc4c3nc(N)n3nc(-c5ccccc5C(F)(F)F)nc43)CC2)cc1	CHEMBL247900	1
COCCOc1ccc(N2CCN(CCn3cnc4c3nc(N)n3nc(-c5ccccc5F)nc43)CC2)cc1	CHEMBL246673	1
COCCOc1ccc(N2CCN(CCn3cnc4c3nc(N)n3nc(-c5cccc(F)c5)nc43)CC2)cc1	CHEMBL246469	1
COCCOc1ccc(N2CCN(CCn3cnc4c3nc(N)n3nc(-c5ccccc5)nc43)CC2)cc1	CHEMBL246468	1
Nc1nc2c(ncn2CCN2CCN(c3ccc(Cl)cn3)CC2)c2nc(-c3ccco3)nn12	CHEMBL246467	1
Cc1ccc(N2CCN(CCn3cnc4c3nc(N)n3nc(-c5ccco5)nc43)CC2)nc1	CHEMBL392169	1
Nc1nc2c(ncn2CCN2CCN(c3nccs3)CC2)c2nc(-c3ccco3)nn12	CHEMBL246263	1
Nc1nc2c(ncn2CCN2CCN(c3ncc(F)cn3)CC2)c2nc(-c3ccco3)nn12	CHEMBL246262	1
Nc1nc2c(ncn2CCN2CCN(c3cccc(Cl)c3)CC2)c2nc(-c3ccco3)nn12	CHEMBL246261	1
Nc1nc2c(ncn2CCN2CCN(c3ccc(Cl)cc3F)CC2)c2nc(-c3ccco3)nn12	CHEMBL246055	1
Nc1nc2c(ncn2CCN2CCC(c3ccc(F)cc3)CC2)c2nc(-c3ccco3)nn12	CHEMBL392168	1
COCCOc1ccc(C2CCN(CCn3cnc4c3nc(N)n3nc(-c5ccco5)nc43)CC2)cc1	CHEMBL246054	1
Nc1nc2c(ncn2CCN2CCN(c3ccc(F)cc3F)CC2)c2nc(-c3ccco3)nn12	CHEMBL246053	1
COCCOc1ccc(N2CCN(CCn3cnc4c3nc(N)n3nc(-c5ccco5)nc43)CC2)c(C(F)(F)F)c1	CHEMBL391953	1
COCCOc1ccc(N2CCN(CCn3cnc4c3nc(N)n3nc(-c5ccco5)nc43)CC2)c(F)c1	CHEMBL245849	1
COCCOc1ccc(N2CCN(CCn3cnc4c3nc(N)n3nc(-c5ccco5)nc43)CC2)cc1	CHEMBL395472	1
COc1ccc(N2CCN(CCn3cnc4c3nc(N)n3nc(-c5ccco5)nc43)CC2)cc1	CHEMBL245848	1
Nc1nc2c(ncn2Cc2ccccc2C(F)(F)F)c2nc(-c3ccco3)nn12	CHEMBL398083	1
Nc1nc2c(ncn2Cc2ccccc2Cl)c2nc(-c3ccco3)nn12	CHEMBL245847	1
Nc1nc2c(ncn2Cc2ccccc2Br)c2nc(-c3ccco3)nn12	CHEMBL245646	1
Nc1nc2c(ncn2Cc2ccccc2)c2nc(-c3ccco3)nn12	CHEMBL245645	1
Nc1nc2c(ncn2CCN2CCN(c3ccccc3)CC2)c2nc(-c3ccco3)nn12	CHEMBL248300	1
Nc1nc2c(ncn2CCc2ccccc2)c2nc(-c3ccco3)nn12	CHEMBL398046	1
Nc1nc2c(ncn2CCN2CCOCC2)c2nc(-c3ccco3)nn12	CHEMBL248299	1
Cn1c(=O)c2c(nc(/C=C/c3cccc(Cl)c3)n2C)n(C)c1=O	CHEMBL26138	1
Cc1cc(C)n(-c2cc(NC(=O)Cc3ccc(S(C)(=O)=O)cc3)nc(-c3ccccn3)n2)n1	CHEMBL270654	1
Nc1nc2c(cnn2CCN2Cc3ccccc3C2)c2nc(-c3ccco3)nn12	CHEMBL471923	1
Nc1nc2c(cnn2CCN2CCc3ncc(-c4ccccc4)cc3C2)c2nc(-c3ccco3)nn12	CHEMBL469879	1
Nc1nc2c(cnn2CCN2CCc3nc(C(F)(F)F)ccc3C2)c2nc(-c3ccco3)nn12	CHEMBL511446	1
Nc1nc2c(cnn2CCN2CCc3ncncc3C2)c2nc(-c3ccco3)nn12	CHEMBL513030	1
COCCOc1cnc2c(c1)CN(CCn1ncc3c1nc(N)n1nc(-c4ccco4)nc31)CC2	CHEMBL470089	1
Nc1nc2c(cnn2CCN2CCc3ncc(Br)cc3C2)c2nc(-c3ccco3)nn12	CHEMBL470088	1
Nc1nc2c(cnn2CCN2CCc3ncc(C4CC4)cc3C2)c2nc(-c3ccco3)nn12	CHEMBL469893	1
Cc1cnc2c(c1)CN(CCn1ncc3c1nc(N)n1nc(-c4ccco4)nc31)CC2	CHEMBL513364	1
Nc1nc2c(cnn2CCN2CCc3ncccc3C2)c2nc(-c3ccco3)nn12	CHEMBL471554	1
COCCOc1ccc2c(c1)CCN(CCn1ncc3c1nc(N)n1nc(-c4ccco4)nc31)CC2	CHEMBL471553	1
COc1ccc2c(c1)CCN(CCn1ncc3c1nc(N)n1nc(-c4ccco4)nc31)CC2	CHEMBL472114	1
Nc1nc2c(cnn2CCN2CCc3ccc(Cl)cc3CC2)c2nc(-c3ccco3)nn12	CHEMBL512892	1
Nc1nc2c(cnn2CCN2CCc3ccc(Br)cc3CC2)c2nc(-c3ccco3)nn12	CHEMBL472112	1
Nc1nc2c(cnn2CCN2CCc3ccc([N+](=O)[O-])cc3CC2)c2nc(-c3ccco3)nn12	CHEMBL472111	1
Nc1nc2c(cnn2CCN2CCc3ccccc3CC2)c2nc(-c3ccco3)nn12	CHEMBL472110	1
COCCOc1ccc2c(c1)CN(CCn1ncc3c1nc(N)n1nc(-c4ccco4)nc31)CC2	CHEMBL512891	1
COc1ccc2c(c1)CN(CCn1ncc3c1nc(N)n1nc(-c4ccco4)nc31)CC2	CHEMBL469674	1
COc1ccc2c(c1)CCN(CCn1ncc3c1nc(N)n1nc(-c4ccco4)nc31)C2	CHEMBL469673	1
COCCOc1cccc2c1CN(CCn1ncc3c1nc(N)n1nc(-c4ccco4)nc31)CC2	CHEMBL512133	1
COc1cc2c(cc1OC)C(Cc1ccccc1)N(CCn1ncc3c1nc(N)n1nc(-c4ccco4)nc31)CC2	CHEMBL510959	1
COc1cc2c(cc1OC)CN(CCn1ncc3c1nc(N)n1nc(-c4ccco4)nc31)C(C)C2	CHEMBL470087	1
Nc1nc2c(cnn2CCN2CCc3ccccc3C2)c2nc(-c3ccco3)nn12	CHEMBL469877	1
COCCOc1cccc2c1CN(CCn1ncc3c1nc(N)n1nc(-c4ccco4)nc31)C2	CHEMBL469874	1
COc1cccc2c1CN(CCn1ncc3c1nc(N)n1nc(-c4ccco4)nc31)C2	CHEMBL471924	1
COc1ccc2c(c1)CN(CCn1ncc3c1nc(N)n1nc(-c4ccco4)nc31)C2	CHEMBL469876	1
Nc1nc2c(cnn2CCc2ccc(-c3ccccc3)cc2)c2nc(-c3ccco3)nn12	CHEMBL482078	1
Nc1nc2c(cnn2CCc2ccc3nc(N4CCOCC4)ccc3c2)c2nc(-c3ccco3)nn12	CHEMBL479784	1
CC(c1ccc2cc(CCn3ncc4c3nc(N)n3nc(-c5ccco5)nc43)ccc2n1)N1CCOCC1	CHEMBL516753	1
Nc1nc2c(cnn2CCc2ccc3nc(C(=O)N4CCOCC4)ccc3c2)c2nc(-c3ccco3)nn12	CHEMBL482138	1
Nc1nc2c(cnn2CCc2ccc3nc(CN4CCOCC4)ccc3c2)c2nc(-c3ccco3)nn12	CHEMBL481147	1
COCCOC(C)c1ccc2cc(CCn3ncc4c3nc(N)n3nc(-c5ccco5)nc43)ccc2n1	CHEMBL481146	1
COCCOCc1ccc2cc(CCn3ncc4c3nc(N)n3nc(-c5ccco5)nc43)ccc2n1	CHEMBL480177	1
CCc1ccc2cc(CCn3ncc4c3nc(N)n3nc(-c5ccco5)nc43)ccc2n1	CHEMBL481956	1
Cc1ccc2cc(CCn3ncc4c3nc(N)n3nc(-c5ccco5)nc43)ccc2n1	CHEMBL520782	1
Nc1nc2c(cnn2CCc2ccc(-c3cccnc3)cn2)c2nc(-c3ccco3)nn12	CHEMBL482283	1
Nc1nc2c(cnn2CCc2cccc(-c3cccnc3)c2)c2nc(-c3ccco3)nn12	CHEMBL519282	1
Nc1nc2c(cnn2CCc2ccc(-c3cnccn3)cc2)c2nc(-c3ccco3)nn12	CHEMBL481132	1
Cc1ccc(-c2ccc(CCn3ncc4c3nc(N)n3nc(-c5ccco5)nc43)cc2)cn1	CHEMBL519111	1
COc1ccc(-c2ccc(CCn3ncc4c3nc(N)n3nc(-c5ccco5)nc43)cc2)cn1	CHEMBL481771	1
Nc1nc2c(cnn2CCc2ccc(-c3cccnc3)cc2)c2nc(-c3ccco3)nn12	CHEMBL519784	1
Nc1nc2c(cnn2CCc2ccc(-c3ccc(OC(F)(F)F)cc3)cc2)c2nc(-c3ccco3)nn12	CHEMBL481770	1
COc1ccc(-c2ccc(CCn3ncc4c3nc(N)n3nc(-c5ccco5)nc43)cc2)cc1	CHEMBL521438	1
COc1cc(OC)cc(-c2cc(NC(C)=O)nc(-n3nc(C)cc3C)n2)c1	CHEMBL487569	1
CC(=O)Nc1cc(-c2cccc(N3CCOCC3)n2)nc(-n2nc(C)cc2C)n1	CHEMBL520229	1
COC1CN(c2cccc(-c3cc(NC(C)=O)nc(-n4nc(C)cc4C)n3)n2)C1	CHEMBL487554	1
CC(=O)Nc1cc(-c2cccc(N3CCC(O)CC3)n2)nc(-n2nc(C)cc2C)n1	CHEMBL521223	1
CCC(=O)Nc1cc(-c2cncc(OC)c2)nc(-n2nc(C)cc2C)n1	CHEMBL486140	1
COc1cccc(-c2cc(NC(C)=O)nc(-n3nc(C)cc3C)n2)c1F	CHEMBL486745	1
COc1cncc(-c2cc(NC(=O)CN3CCOCC3)nc(-n3nc(C)cc3C)n2)c1	CHEMBL486131	1
COc1cncc(-c2cc(NC(C)=O)nc(-n3nc(C)cc3C)n2)c1	CHEMBL458242	1
CC(=O)Nc1cc(-c2cncc(O)c2)nc(-n2nc(C)cc2C)n1	CHEMBL486130	1
COCCN(C)c1cccc(-c2cc(NC(C)=O)nc(-n3nc(C)cc3C)n2)n1	CHEMBL485972	1
CC(=O)Nc1cc(-c2cccc(N3CCN(C)CC3)n2)nc(-n2nc(C)cc2C)n1	CHEMBL486162	1
N#Cc1c(-c2ccco2)cc(-c2ccco2)nc1N	CHEMBL506250	1
COC[C@H]1CCCN1c1cc(NC(C)=O)nc(-n2nc(C)cc2C)n1	CHEMBL458224	1
Cc1cc(Cn2nnc3c(-c4ccco4)nc(N)nc32)ccc1N	CHEMBL447664	1
N#Cc1ccc(Cn2nnc3c(-c4ccco4)nc(N)nc32)cc1	CHEMBL461007	1
Nc1nc(-c2ncco2)c2nnn(Cc3ccccc3F)c2n1	CHEMBL468701	1
Cc1ccc(C(=O)c2nc(NC(C)c3cccnc3)nc3ccsc23)s1	CHEMBL1079115	1
O=C(c1cccs1)c1nc(NCc2cccnc2)nc2ccsc12	CHEMBL1079118	1
O=C(c1cccs1)c1nc(NCc2cccnc2)nc2cc(Cl)sc12	CHEMBL1080068	1
Cc1cc(C)nc(NC(=N)NCCc2c[nH]c3ccc(F)cc23)n1	CHEMBL1094986	1
CN(C)CCN(C)C(=O)c1ccc2c(c1)-c1nc(N)nc(-c3ccccc3)c1C2=O	CHEMBL1088259	1
CCN(CC)CCN(C)C(=O)c1ccc2c(c1)-c1nc(N)nc(-c3ccccc3)c1C2=O	CHEMBL1088260	1
CCN(CC)CCNC(=O)c1ccc2c(c1)-c1nc(N)nc(-c3ccccc3)c1C2=O	CHEMBL1088261	1
Nc1nc(-c2ccccc2)c2c(n1)-c1cc(C(=O)NCCN3CCOCC3)ccc1C2=O	CHEMBL1088393	1
CN1CCC(N(C)C(=O)c2ccc3c(c2)-c2nc(N)nc(-c4ccccc4)c2C3=O)CC1	CHEMBL1086804	1
CC(C)N1CCC(NC(=O)c2ccc3c(c2)-c2nc(N)nc(-c4ccccc4)c2C3=O)CC1	CHEMBL1087183	1
Nc1nc(-c2ccccc2)c2c(n1)-c1cc(C(=O)N3CCNCC3)ccc1C2=O	CHEMBL1087184	1
CN1CCN(C(=O)c2ccc3c(c2)-c2nc(N)nc(-c4ccccc4)c2C3=O)CC1	CHEMBL1087185	1
CN1CCN(C(=O)c2ccc3c(c2)-c2nc(N)nc(-c4ccc(F)cc4)c2C3=O)CC1	CHEMBL1086697	1
CCN1CCN(C(=O)c2ccc3c(c2)-c2nc(N)nc(-c4ccccc4)c2C3=O)CC1	CHEMBL1087084	1
CCN1CCN(C(=O)c2ccc3c(c2)-c2nc(N)nc(-c4ccc(F)cc4)c2C3=O)CC1	CHEMBL1087085	1
CC(C)N1CCN(C(=O)c2ccc3c(c2)-c2nc(N)nc(-c4ccccc4)c2C3=O)CC1	CHEMBL1087086	1
CN(C)CCOc1ccc2c(c1)-c1nc(N)nc(-c3ccccc3)c1C2=O	CHEMBL1088710	1
CN(C)CCOc1ccc2c(c1)-c1nc(N)nc(-c3ccc(F)cc3)c1C2=O	CHEMBL1087998	1
CCN(CC)CCOc1ccc2c(c1)-c1nc(N)nc(-c3ccccc3)c1C2=O	CHEMBL1087999	1
CCN(CC)CCOc1ccc2c(c1)-c1nc(N)nc(-c3ccc(F)cc3)c1C2=O	CHEMBL1088132	1
CC(C)N(CCOc1ccc2c(c1)-c1nc(N)nc(-c3ccccc3)c1C2=O)C(C)C	CHEMBL1094721	1
Nc1nc(-c2ccccc2)c2c(n1)-c1cc(OCCN3CCCCC3)ccc1C2=O	CHEMBL1095487	1
Nc1nc(-c2ccccc2)c2c(n1)-c1cc(OCCN3CCOCC3)ccc1C2=O	CHEMBL1095488	1
Nc1nc(-c2ccc(F)cc2)c2c(n1)-c1cc(OCCN3CCOCC3)ccc1C2=O	CHEMBL1095489	1
Nc1nc(-c2ccccc2)c2c(n1)-c1cc(OCCN3CCCC3)ccc1C2=O	CHEMBL1095490	1
Nc1nc(-c2ccc(F)cc2)c2c(n1)-c1cc(OCCN3C4CCC3CC4)ccc1C2=O	CHEMBL1094846	1
CN(C)CCN(C)c1ccc2c(c1)-c1nc(N)nc(-c3ccccc3)c1C2=O	CHEMBL1098457	1
Nc1nc(-c2ccccc2)c2c(n1)-c1cc(NCCc3ccncc3)ccc1C2=O	CHEMBL1098458	1
Nc1nc(-c2ccccc2)c2c(n1)-c1cc(NCCc3ccccn3)ccc1C2=O	CHEMBL1098765	1
Nc1nc(-c2ccccc2)c2c(n1)-c1cc(NCCN3CCOCC3)ccc1C2=O	CHEMBL1095172	1
Nc1nc(-c2ccccc2)c2c(n1)-c1cc(NCCN3CCS(=O)(=O)CC3)ccc1C2=O	CHEMBL1095811	1
CCN1CCC(Nc2ccc3c(c2)-c2nc(N)nc(-c4ccccc4)c2C3=O)CC1	CHEMBL1095812	1
CCN1CCC(N(C)c2ccc3c(c2)-c2nc(N)nc(-c4ccccc4)c2C3=O)CC1	CHEMBL1095813	1
Nc1nc(-c2ccccc2)c2c(n1)-c1cc(N3CCOCC3)ccc1C2=O	CHEMBL1095822	1
CN1CCN(c2ccc3c(c2)-c2nc(N)nc(-c4ccccc4)c2C3=O)CC1	CHEMBL1096134	1
CCN1CCN(c2ccc3c(c2)-c2nc(N)nc(-c4ccccc4)c2C3=O)CC1	CHEMBL1094244	1
Nc1nc(-c2ccccc2)c2c(n1)-c1cc(N3CCN(CC4CC4)CC3)ccc1C2=O	CHEMBL1094547	1
CN1CCCN(c2ccc3c(c2)-c2nc(N)nc(-c4ccccc4)c2C3=O)CC1	CHEMBL1094548	1
CC(C)N(CCOc1ccc2c(c1)-c1nc(N)nc(-c3ccc(F)cc3)c1C2=O)C(C)C	CHEMBL1087080	1
Nc1nc(-c2ccccc2)c2c(n1)-c1cc(CNN3CCC(=O)CC3)ccc1C2=O	CHEMBL1099028	1
Nc1nc(-c2ccccc2)c2c(n1)-c1cc(CNN3CCOCC3)ccc1C2=O	CHEMBL1088247	1
Nc1nc(-c2ccccc2)c2c(n1)-c1cc(CNN3CCCC3)ccc1C2=O	CHEMBL1099368	1
Nc1nc(-c2ccc(F)cc2)c2c(n1)-c1cc(CNN3CCCC3)ccc1C2=O	CHEMBL1088533	1
CN(C)CCN(C)Cc1ccc2c(c1)-c1nc(N)nc(-c3ccccc3)c1C2=O	CHEMBL1088683	1
Nc1nc(-c2ccco2)c2c(n1)-c1ccccc1C2=O	CHEMBL1095999	1
Nc1nc(-c2ccc(Cl)o2)c2c(n1)-c1ccccc1C2=O	CHEMBL1097494	1
CN(C)CCN(C)c1ccc(-c2nc(N)nc3c2C(=O)c2ccccc2-3)o1	CHEMBL1097495	1
Nc1nc(-c2cccs2)c2c(n1)-c1ccccc1C2=O	CHEMBL1086846	1
Nc1nc(-c2nccs2)c2c(n1)-c1ccccc1C2=O	CHEMBL1086847	1
Nc1nc(-c2ccncc2)c2c(n1)-c1ccccc1C2=O	CHEMBL1086977	1
Nc1nc(-c2ccccc2)c2c(n1)-c1ccccc1C2=O	CHEMBL369573	1
Nc1nc(-c2ccc(Cl)cc2)c2c(n1)-c1ccccc1C2=O	CHEMBL1096998	1
COc1cccc(-c2nc(N)nc3c2C(=O)c2ccccc2-3)c1	CHEMBL1086978	1
COc1ccccc1-c1nc(N)nc2c1C(=O)c1ccccc1-2	CHEMBL1087869	1
CN(C)CCN(C)Cc1cccc2c1-c1nc(N)nc(-c3ccccc3)c1C2=O	CHEMBL1087699	1
CCN(CC)Cc1cccc2c1-c1nc(N)nc(-c3ccccc3)c1C2=O	CHEMBL1087700	1
Nc1nc(-c2ccccc2)c2c(n1)-c1c(CN3CCCCC3)cccc1C2=O	CHEMBL1087701	1
CN1CCN(Cc2cccc3c2-c2nc(N)nc(-c4ccccc4)c2C3=O)CC1	CHEMBL1087702	1
CC(=O)N1CCN(Cc2cccc3c2-c2nc(N)nc(-c4ccccc4)c2C3=O)CC1	CHEMBL1087819	1
Nc1nc(-c2ccccc2)c2c(n1)-c1c(CN3CCCCCC3)cccc1C2=O	CHEMBL1087820	1
Nc1nc(-c2ccccc2)c2c(n1)-c1c(CN3CCOCC3)cccc1C2=O	CHEMBL1087462	1
Nc1nc(-c2ccc(F)cc2)c2c(n1)-c1c(CN3CCOCC3)cccc1C2=O	CHEMBL1087463	1
N#Cc1cccc(-c2nc(N)nc3c2C(=O)c2cccc(CN4CCOCC4)c2-3)c1	CHEMBL1087708	1
Nc1nc(-c2ccccc2)c2c(n1)-c1c(CN3CCCC3)cccc1C2=O	CHEMBL1087709	1
Nc1nc(-c2ccc(F)cc2)c2c(n1)-c1c(CN3CCCC3)cccc1C2=O	CHEMBL1087710	1
CC1CCC(C)N1Cc1cccc2c1-c1nc(N)nc(-c3ccccc3)c1C2=O	CHEMBL1087711	1
Nc1nc(-c2ccccc2)c2c(n1)-c1cc(CNCc3ccco3)ccc1C2=O	CHEMBL1087714	1
Nc1nc(-c2ccccc2)c2c(n1)-c1cc(CNCc3ccccn3)ccc1C2=O	CHEMBL1088235	1
Nc1nc(-c2ccccc2)c2c(n1)-c1cc(CNN3CCCCC3)ccc1C2=O	CHEMBL1088236	1
Nc1nc(-c2ccc(F)cc2)c2c(n1)-c1cc(CNN3CCCCC3)ccc1C2=O	CHEMBL1088237	1
CN1CCN(NCc2ccc3c(c2)-c2nc(N)nc(-c4ccccc4)c2C3=O)CC1	CHEMBL1088665	1
CN1CCN(NCc2ccc3c(c2)-c2nc(N)nc(-c4ccc(F)cc4)c2C3=O)CC1	CHEMBL1087726	1
Nc1nc(-c2ccccc2)c2c(n1)-c1cc(CNN3CCCCCC3)ccc1C2=O	CHEMBL1087727	1
Nc1nc(-c2ccccc2)c2c(n1)-c1cc(CN3CCCC3)ccc1C2=O	CHEMBL3217142	1
CC(C)CC(=O)Nc1ccc(C(=O)Nc2nccs2)cc1	CHEMBL1671921	1
CC(C)(C)CC(=O)Nc1ccc(C(=O)Nc2nccs2)cc1	CHEMBL1671922	1
Cc1cc(C(=O)Nc2nccs2)ccc1NC(=O)CC(C)(C)C	CHEMBL1671933	1
C=Cn1ncc2c1nc(N)n1c(=O)n(CC3CC3)nc21	CHEMBL1762638	1
Nc1nc2c(cnn2CCN2CCN(c3cnccn3)CC2)c2nn(Cc3cccc(Cl)c3)c(=O)n12	CHEMBL1762637	1
Nc1nc2c(cnn2CCN2CCN(c3cnccn3)CC2)c2nn(Cc3ccccc3)c(=O)n12	CHEMBL1762636	1
COCCOc1ccc(N2CCN(CCn3ncc4c3nc(N)n3c(=O)n(Cc5cccc(Cl)c5)nc43)CC2)c(F)c1	CHEMBL1762635	1
Nc1nc2c(cnn2CCN2CCN(c3ccc(F)cc3F)CC2)c2nn(Cc3cccc(Cl)c3)c(=O)n12	CHEMBL1762633	1
CS(=O)(=O)N1CCN(CCn2ncc3c2nc(N)n2c(=O)n(Cc4cccc(Cl)c4)nc32)CC1	CHEMBL1762629	1
CS(=O)(=O)N1CCN(CCn2ncc3c2nc(N)n2c(=O)n(Cc4ccccc4)nc32)CC1	CHEMBL1762628	1
Nc1nc2c(cnn2CCN2CCC(N3CCOCC3)CC2)c2nn(Cc3cccc(Cl)c3)c(=O)n12	CHEMBL1762627	1
Nc1nc2c(cnn2CCN2CCC(N3CCOCC3)CC2)c2nn(Cc3ccccc3)c(=O)n12	CHEMBL1762626	1
Nc1nc2c(cnn2CCN2CCC3(CC2)OCCO3)c2nn(Cc3cccc(Cl)c3)c(=O)n12	CHEMBL1762625	1
Nc1nc2c(cnn2CCN2CCC3(CC2)OCCO3)c2nn(Cc3ccccc3)c(=O)n12	CHEMBL1762624	1
Nc1nc2c(cnn2CCN2CCOCC2)c2nn(Cc3cccc(Cl)c3)c(=O)n12	CHEMBL1762515	1
Nc1nc2c(cnn2CCN2CCOCC2)c2nn(Cc3ccccc3)c(=O)n12	CHEMBL1762514	1
CN(C)CCn1ncc2c1nc(N)n1c(=O)n(Cc3cccc(Cl)c3)nc21	CHEMBL1762513	1
C=Cn1ncc2c1nc(N)n1c(=O)n(Cc3cccc(Cl)c3)nc21	CHEMBL1762511	1
C=Cn1ncc2c1nc(N)n1c(=O)n(Cc3ccccc3)nc21	CHEMBL1762510	1
Nc1nc2c(c3nn(Cc4ccccc4)c(=O)n13)CCc1ccccc1-2	CHEMBL1762509	1
Nc1nc(-c2ccccc2)cc2nn(Cc3ccccc3)c(=O)n12	CHEMBL1762506	1
Nc1nc(-c2ccccc2)cc2nc(-c3ccco3)nn12	CHEMBL174850	1
CC(C)n1cc(-c2ncc(N)nc2-c2ccc(F)cc2)ccc1=O	CHEMBL2165804	1
Nc1nc(-c2ccccc2)c2c(n1)-c1cc(C(F)(F)c3cccnc3)ccc1C2=O	CHEMBL2165803	1
Nc1nc(-c2ccccc2)c2c(n1)-c1cc(C(=O)c3cccnc3)ccc1C2=O	CHEMBL2165802	1
Nc1nc(-c2ccccc2)c2c(n1)-c1cc(Cc3cnccc3Cl)ccc1C2=O	CHEMBL2165801	1
Nc1nc(-c2ccccc2)c2c(n1)-c1cc(Cc3ccncc3F)ccc1C2=O	CHEMBL2165800	1
Nc1nc(-c2ccccc2)c2c(n1)-c1cc(Cc3cncc(F)c3)ccc1C2=O	CHEMBL2165799	1
N#Cc1cncc(Cc2ccc3c(c2)-c2nc(N)nc(-c4ccccc4)c2C3=O)c1	CHEMBL2165808	1
Nc1nc(-c2ccccc2)c2c(n1)-c1cc(Cc3cccnc3)ccc1C2=O	CHEMBL2165807	1
CC1CC[C@@H](C)N1Cc1ccc2c(c1)-c1nc(N)nc(-c3ccccc3)c1C2=O	CHEMBL2165805	1
Nc1nc(-c2ccccc2)c2c(n1)-c1cc(CN3C4CCC3CC4)ccc1C2=O	CHEMBL2165806	1
Cc1csc(-c2nc(N)c3cc(C(C)c4ccccc4)sc3n2)n1	CHEMBL2377234	1
Nc1nc(-c2ccncc2)nc2sc(Cc3ccccc3)cc12	CHEMBL2377102	1
Cc1ccc(-c2nc(N)c3cc(-c4ccccc4)sc3n2)o1	CHEMBL2377238	1
C=C(c1ccccc1)c1cc2c(N)nc(-c3cccc(C#N)c3)nc2s1	CHEMBL2377095	1
Cc1nc(-c2nc(N)c3cc(Cc4ccccc4)sc3n2)cs1	CHEMBL2377084	1
CCc1ccc(-c2nc(N)c3cc(Cc4ccccc4)sc3n2)o1	CHEMBL2377113	1
Nc1nc(-c2cccc(F)c2)nc2sc(Cc3ccccc3)cc12	CHEMBL2377097	1
Cc1ccc(-c2nc(N)c3cc(C(C)c4ccccc4)sc3n2)o1	CHEMBL2377112	1
C=C(c1ccccc1)c1cc2c(N)nc(-c3nc(C)cs3)nc2s1	CHEMBL2377235	1
Nc1nc(-c2ccccc2)nc2sc(Cc3ccccc3)cc12	CHEMBL2377088	1
N#Cc1cccc(-c2nc(N)c3cc(Cc4ccccc4)sc3n2)n1	CHEMBL2377105	1
Nc1nc(-c2ccc(C(F)F)o2)nc2sc(Cc3ccccc3)cc12	CHEMBL2377225	1
Nc1nc(-c2ncccn2)nc2sc(Cc3ccccc3)cc12	CHEMBL2377104	1
Cc1csc(-c2nc(N)c3cc(Cc4ccccc4)sc3n2)n1	CHEMBL2377230	1
COc1ccccc1Cc1cc2c(N)nc(-c3nc(C)cs3)nc2s1	CHEMBL2377231	1
COc1ccccc1Cc1cc2c(N)nc(-c3ccc(C(F)F)o3)nc2s1	CHEMBL2377226	1
N#Cc1cccc(-c2nc(N)c3cc(Cc4ccccc4)sc3n2)c1	CHEMBL2377090	1
Cc1ccc(-c2nc(N)c3cc(Cc4ccccc4)sc3n2)o1	CHEMBL2377239	1
COc1ccccc1Cc1cc2c(N)nc(-c3ccc(C)o3)nc2s1	CHEMBL2377109	1
Cc1csc(-c2nc(N)c3cc(Cc4ccccc4F)sc3n2)n1	CHEMBL2377233	1
Nc1nc(-c2cnco2)nc2sc(Cc3ccccc3)cc12	CHEMBL2377229	1
N#Cc1cccc(-c2nc(N)c3cc(Cc4ccccc4F)sc3n2)c1	CHEMBL2377093	1
Cc1csc(-c2nc(N)c3cc(Cc4ccccc4Cl)sc3n2)n1	CHEMBL2377232	1
COc1ccccc1Cc1cc2c(N)nc(-c3cccc(C#N)c3)nc2s1	CHEMBL2377091	1
Nc1nc(-c2ncco2)nc2sc(Cc3ccccc3)cc12	CHEMBL2377228	1
Cc1ccc(-c2nc(N)c3cc(Cc4ccccc4F)sc3n2)o1	CHEMBL2377111	1
Cc1ccc(-c2nc(N)c3cc(Cc4ccccc4Cl)sc3n2)o1	CHEMBL2377110	1
Nc1nc(-c2cnccn2)nc2sc(Cc3ccccc3)cc12	CHEMBL2377103	1
N#Cc1cccc(-c2nc(N)c3cc(Cc4ccccc4Cl)sc3n2)c1	CHEMBL2377092	1
CCOC(=O)CCCOc1ccc(CCNc2nc(N)n3nc(-c4ccco4)nc3n2)cc1	CHEMBL2381770	1
Nc1nc(OCCc2ccccc2)nc2nc(-c3ccco3)nn12	CHEMBL2381761	1
CC(=O)Oc1ccc(CCNc2nc(N)n3nc(-c4ccco4)nc3n2)cc1	CHEMBL2381773	1
CCCC(=O)Oc1ccc(CCNc2nc(N)n3nc(-c4ccco4)nc3n2)cc1	CHEMBL2381774	1
C[C@H]1CCC[C@@H](C)N1Cc1cc2c(N)nc(-c3ccco3)nc2s1	CHEMBL3222062	1
Nc1nc(-c2ccco2)nc2sc(CN3CC=CCC3)cc12	CHEMBL3222058	1
Nc1nc(-c2ccco2)nc2sc(CN3CCCC(F)(F)C3)cc12	CHEMBL3222061	1
Nc1nc(-c2ccco2)nc2sc(CN3CC=CC3)cc12	CHEMBL3222066	1
Nc1nc(-c2ccco2)nc2sc(CN3CCC(F)(F)C3)cc12	CHEMBL3222068	1
Nc1nc(-c2ccc(Cl)o2)nc2sc(CN3CCCC(F)(F)C3)cc12	CHEMBL3217800	1
Nc1nc(-c2ccco2)nc2sc(CN3CCSCC3)cc12	CHEMBL3222065	1
Nc1nc(-c2ccc(Cl)o2)nc2sc(CN3CC=CC3)cc12	CHEMBL3222085	1
Nc1nc(-c2ccco2)nc2sc(CN3CCC(F)C3)cc12	CHEMBL3222067	1
Nc1nc(-c2ccc(Cl)o2)nc2sc(CN3CC=CCC3)cc12	CHEMBL3222084	1
C[C@H]1CCC[C@@H](C)N1Cc1cc2c(N)nc(-c3ccc(Br)o3)nc2s1	CHEMBL3222089	1
N#Cc1cccc(-c2nc(N)c3cc(CN4CC=CCC4)sc3n2)c1	CHEMBL3217866	1
Nc1nc(-c2ccc(Cl)o2)nc2sc(CN3CCC(F)(F)C3)cc12	CHEMBL3222086	1
CC(C)c1ccc(-c2nc(N)c3cc(CN4[C@@H](C)CCC[C@H]4C)sc3n2)o1	CHEMBL3222072	1
Nc1nc(-c2ccco2)nc2sc(CN3CCC(F)CC3)cc12	CHEMBL3222059	1
Nc1nc(-c2ccc(Cl)o2)nc2sc(CN3CCCC3)cc12	CHEMBL3222080	1
Nc1nc(-c2ccc(Br)o2)nc2sc(CN3CCCC3)cc12	CHEMBL3222087	1
CCc1ccc(-c2nc(N)c3cc(CN4[C@@H](C)CCC[C@H]4C)sc3n2)o1	CHEMBL3222070	1
Cc1ccc(-c2nc(N)c3cc(CN4CCCC4)sc3n2)o1	CHEMBL3222052	1
Nc1nc(-c2ccco2)nc2sc(CN3CCCCCC3)cc12	CHEMBL3222054	1
Nc1nc(-c2ccco2)nc2sc(CN3CCCC3)cc12	CHEMBL3222051	1
C[C@H]1CCC[C@@H](C)N1Cc1cc2c(N)nc(-c3ccc(C(F)F)o3)nc2s1	CHEMBL3222076	1
Cc1ccc(-c2nc(N)c3cc(CN4CCCCC4)sc3n2)o1	CHEMBL3222053	1
Nc1nc(-c2ccco2)nc2sc(CN3CCOCC3)cc12	CHEMBL3222055	1
Nc1nc(-c2ccc(Br)o2)nc2sc(CN3CCOCC3)cc12	CHEMBL3222088	1
Nc1nc(-c2ccc(C(F)F)o2)nc2sc(CN3CCOCC3)cc12	CHEMBL3222075	1
Cc1ccc(-c2nc(N)c3cc(CN4CCOCC4)sc3n2)o1	CHEMBL3222056	1
Nc1nc(-c2ccc(Cl)o2)nc2sc(CN3CCCCCC3)cc12	CHEMBL3222081	1
Nc1nc(-c2ccco2)nc2sc(CNC3CC3)cc12	CHEMBL3222049	1
N#Cc1cccc(-c2nc(N)c3cc(CN4CCOCC4)sc3n2)c1	CHEMBL3222109	1
N#Cc1cccc(-c2nc(N)c3cc(CN4CCCC(F)(F)C4)sc3n2)c1	CHEMBL3217864	1
Nc1nc(-c2ccc(C(F)F)o2)nc2sc(CN3CCC(F)CC3)cc12	CHEMBL3222077	1
Nc1nc(-c2ccc(C(F)F)o2)nc2sc(CN3CCCC(F)(F)C3)cc12	CHEMBL3222079	1
Nc1nc(-c2ccc(Cl)o2)nc2sc(CN3CCOCC3)cc12	CHEMBL3222082	1
Nc1nc(-c2ccco2)nc2sc(CN3CCC(F)(F)CC3)cc12	CHEMBL3222060	1
N#Cc1cccc(-c2nc(N)c3cc(CN4CCSCC4)sc3n2)c1	CHEMBL3217865	1
N#Cc1cccc(-c2nc(N)c3cc(CN4CCC(F)CC4)sc3n2)c1	CHEMBL3217863	1
CCN(CC)Cc1cc2c(N)nc(-c3ccco3)nc2s1	CHEMBL3222048	1
C[C@H]1CCC[C@@H](C)N1Cc1cc2c(N)nc(-c3cccc(C#N)c3)nc2s1	CHEMBL3222110	1
CCc1ccc(-c2nc(N)c3cc(CN4CCOCC4)sc3n2)o1	CHEMBL3222069	1
N#Cc1ccc(-c2nc(N)c3cc(CN4CC=CC4)sc3n2)cc1	CHEMBL3217872	1
N#Cc1cccc(-c2nc(N)c3cc(CN4CC=CC4)sc3n2)c1	CHEMBL3222108	1
Cc1csc(-c2nc(N)c3cc(CN4[C@@H](C)CCC[C@H]4C)sc3n2)n1	CHEMBL3222095	1
COc1cccc(-c2nc(N)c3cc(CN4CCCC(F)(F)C4)sc3n2)c1	CHEMBL3217882	1
Nc1nc(-c2ccc(Cl)o2)nc2sc(CN3CCC(F)CC3)cc12	CHEMBL3222083	1
O=C(CC1CCCC1)Nc1ccc(C(=O)Nc2nccs2)cc1	CHEMBL3401300	1
CCCn1c(=O)c2nn(-c3ccc(Cl)cc3N)nc2n(CCC)c1=O	CHEMBL100832	0
Cn1c(=O)c2c(nnn2-c2ccc(Cl)cc2N)n(C)c1=O	CHEMBL328812	0
CCCn1c(=O)c2nn(C3CCCCC3)nc2n(CCC)c1=O	CHEMBL323074	0
Cn1c(=O)c2c(ncn2C)n(C)c1=O	CHEMBL113	0
Cn1c(=O)c2nn(C3CC4CCC3C4)nc2n(C)c1=O	CHEMBL319534	0
CCCn1c(=O)c2c(nnn2C2CCCCC2)n(CCC)c1=O	CHEMBL101554	0
Cn1nc2c(=O)n(C)c(=O)n(C)c2n1	CHEMBL100810	0
CCCn1c(=O)c2nn(C3CCCC3)nc2n(CCC)c1=O	CHEMBL100347	0
CCCn1c(=O)c2c(nnn2C2CCCCC2O)n(CCC)c1=O	CHEMBL100440	0
Cn1c(=O)c2c(nnn2C2CCCC2)n(C)c1=O	CHEMBL100909	0
Cn1c(=O)c2nn(C3CCCCC3)nc2n(C)c1=O	CHEMBL100389	0
Cn1c(=O)c2nn(C3CCCC3)nc2n(C)c1=O	CHEMBL101525	0
CCOc1ccc(-n2nc3c(N)nc4ccccc4n3c2=O)cc1	CHEMBL120662	0
Cc1cccc(-n2cc3c(n2)c(NC2CCCCC2)nc2ccccc23)c1	CHEMBL442005	0
Nc1nc2ccccc2c2cn(-c3ccc(Cl)cc3)nc12	CHEMBL104178	0
C[C@@]1(O)[C@H](O)[C@@H](CO)O[C@H]1n1cnc2c(NC3CCCC3)ncnc21	CHEMBL400189	0
O=c1c2c(nc3ccccn32)n(Cc2ccccc2)c(=O)n1Cc1ccccc1	CHEMBL419394	0
Nc1ncnc2c1ncn2[C@H]1[C@H](O)[C@H](O)[C@]2(CO)C[C@H]12	CHEMBL287321	0
COC(=O)C1=C(C)NC(C)=C(C(=O)OC)C1c1ccccc1[N+](=O)[O-]	CHEMBL193	0
O=c1c(O)c(-c2ccccc2)oc2cc(O)cc(O)c12	CHEMBL309490	0
CCOC(=O)c1sc(SCc2ccccc2)c2c1CCCC2=O	CHEMBL87496	0
CCNC(=O)[C@H]1O[C@@H](n2cnc3c(N)nc(NC(=O)CCC4CCCC4)nc32)[C@H](O)[C@@H]1O	CHEMBL36734	0
Nc1ncnc2c1ncn2[C@@]12C[C@H]1[C@H](CO)[C@@H](O)[C@H]2O	CHEMBL2112095	0
CNC(=O)c1cnn(-c2nc(N)c3ncn([C@@H]4O[C@H](CO)[C@@H](O)[C@H]4O)c3n2)c1	CHEMBL317052	0
CCCCC#Cc1nc2c(N)ncnc2n1[C@@H]1O[C@H](CO)[C@@H](O)[C@H]1O	CHEMBL2181966	0
Nc1ncnc2c1nc(C#Cc1ccccc1)n2[C@@H]1O[C@H](CO)[C@@H](O)[C@H]1O	CHEMBL3350497	0
Nc1ncnc2c1nc(/C=C/C(=O)c1ccccc1)n2[C@@H]1O[C@H](CO)[C@@H](O)[C@H]1O	CHEMBL3350496	0
Cc1cc(-c2ccccc2)nn1-c1nc(N)c2ncn([C@@H]3O[C@H](CO)[C@@H](O)[C@H]3O)c2n1	CHEMBL317053	0
CCCNC(=O)Cn1cc(-c2nc(N)c3ncn([C@@H]4O[C@H](CO)[C@@H](O)[C@H]4O)c3n2)cn1	CHEMBL98023	0
CCCc1c(C)nn(-c2nc(N)c3ncn([C@@H]4O[C@H](CO)[C@@H](O)[C@H]4O)c3n2)c1C	CHEMBL98973	0
Cn1cc(-c2nc(N)c3ncn([C@@H]4O[C@H](CO)[C@@H](O)[C@H]4O)c3n2)cn1	CHEMBL318264	0
CN(C)C(=O)Cn1cc(-c2nc(N)c3ncn([C@@H]4O[C@H](CO)[C@@H](O)[C@H]4O)c3n2)cn1	CHEMBL100513	0
CCCCc1c(C)nn(-c2nc(N)c3ncn([C@@H]4O[C@H](CO)[C@@H](O)[C@H]4O)c3n2)c1C	CHEMBL443495	0
Nc1nc(-c2cnn(CC(=O)O)c2)nc2c1ncn2[C@@H]1O[C@H](CO)[C@@H](O)[C@H]1O	CHEMBL319949	0
CCNC(=O)Cn1cc(-c2nc(N)c3ncn([C@@H]4O[C@H](CO)[C@@H](O)[C@H]4O)c3n2)cn1	CHEMBL99554	0
Nc1nc(-c2cn[nH]c2)nc2c1ncn2[C@@H]1O[C@H](CO)[C@@H](O)[C@H]1O	CHEMBL98849	0
Nc1nc(-c2cnn(CCO)c2)nc2c1ncn2[C@@H]1O[C@H](CO)[C@@H](O)[C@H]1O	CHEMBL328642	0
CCCCCCCCCCn1cc(-c2nc(N)c3ncn([C@@H]4O[C@H](CO)[C@@H](O)[C@H]4O)c3n2)cn1	CHEMBL98958	0
CNC(=O)Cn1cc(-c2nc(N)c3ncn([C@@H]4O[C@H](CO)[C@@H](O)[C@H]4O)c3n2)cn1	CHEMBL316729	0
COC(=O)Cn1cc(-c2nc(N)c3ncn([C@@H]4O[C@H](CO)[C@@H](O)[C@H]4O)c3n2)cn1	CHEMBL100992	0
CCCn1c(=O)[nH]c(=O)c2[nH]cnc21	CHEMBL279898	0
C=c1ccccc1=C1NC(COc2ccc(-c3nc4c([nH]3)c(=O)n(CCC)c(=O)n4CCC)cc2)=NO1	CHEMBL181873	0
COCCCn1c(=O)n(C)c(=O)c2[nH]c(-c3ccc(OCC(=O)O)cc3)cc21	CHEMBL201133	0
CCCN1C(=O)N2C[C@@H](C(C)C)N=C2c2nc(C34CCC(CCC(=O)O)(CC3)CC4)[nH]c21	CHEMBL216200	0
CNC(=O)[C@H]1O[C@@H](n2cnc3c(=NOC)[nH]c(C#Cc4ccccc4)nc32)[C@H](O)[C@@H]1O	CHEMBL221206	0
CCCCCc1ccc(C#Cc2nc3c(ncn3[C@@H]3O[C@H](C(=O)NCC)[C@@H](O)[C@H]3O)c(=NOC)[nH]2)cc1	CHEMBL374336	0
CNC(=O)[C@H]1O[C@@H](n2cnc3c(=NOC)[nH]c(C#Cc4ccc(C(C)=O)cc4)nc32)[C@H](O)[C@@H]1O	CHEMBL223625	0
CNC(=O)[C@H]1O[C@@H](n2cnc3c(=NOC)[nH]c(C#Cc4ccc(F)cc4)nc32)[C@H](O)[C@@H]1O	CHEMBL427077	0
CCCCCc1ccc(C#Cc2nc3c(ncn3[C@@H]3O[C@H](C(=O)NC)[C@@H](O)[C@H]3O)c(=NOC)[nH]2)cc1	CHEMBL220334	0
CNC(=O)[C@H]1O[C@@H](n2cnc3c(=NOC)[nH]c(C#Cc4ccc(C)cc4)nc32)[C@H](O)[C@@H]1O	CHEMBL223456	0
CNC(=O)[C@H]1O[C@@H](n2cnc3c(=NOC)[nH]c(C#Cc4ccccn4)nc32)[C@H](O)[C@@H]1O	CHEMBL223514	0
CNC(=O)[C@H]1O[C@@H](n2cnc3c(=NOC)[nH]c(I)nc32)[C@H](O)[C@@H]1O	CHEMBL385771	0
CON=c1[nH]c(C#Cc2ccc(C)cc2)nc2c1ncn2[C@@H]1O[C@H](CO)[C@@H](O)[C@H]1O	CHEMBL426537	0
CON=c1[nH]c(C#Cc2cccnc2)nc2c1ncn2[C@@H]1O[C@H](CO)[C@@H](O)[C@H]1O	CHEMBL223328	0
CON=c1[nH]c(I)nc2c1ncn2[C@@H]1O[C@H](CO)[C@@H](O)[C@H]1O	CHEMBL223472	0
CN1C[C@H](C(=O)N[C@@H](CCC2CCCCC2)C(=O)N[C@@H](Cc2ccc(F)cc2)C(=O)N2CCC[C@H]2C(N)=O)C=C2c3cccc4[nH]cc(c34)C[C@H]21	CHEMBL438297	0
CC(C)[C@H](NC(=O)[C@@H]1C=C2c3cccc4[nH]cc(c34)C[C@H]2N(C)C1)C(=O)N[C@@H](CCC1CCCCC1)C(=O)N1CCCC(C(N)=O)C1	CHEMBL390298	0
CC(C)[C@H](NC(=O)[C@@H]1C=C2c3cccc4[nH]cc(c34)C[C@H]2N(C)C1)C(=O)N[C@@H](CCC1CCCCC1)C(=O)N1c2ccccc2C[C@H]1C(N)=O	CHEMBL226694	0
O=C1NCC[C@@]12O[C@@H](n1cnc3c(NCc4cccc(I)c4)ncnc31)[C@H](O)[C@@H]2O	CHEMBL344187	0
OC[C@H]1O[C@@H](n2cnc3c(N[C@@H]4CCOC4)ncnc32)[C@H](O)[C@@H]1O	CHEMBL392149	0
O=C(OCc1ccccc1Br)N1[C@H]2CC[C@H]1[C@H](Nc1ncnc3c1ncn3[C@@H]1O[C@H](CO)[C@@H](O)[C@H]1O)C2	CHEMBL430374	0
O=C(OCc1ccccc1Cl)N1[C@H]2CC[C@H]1[C@H](Nc1ncnc3c1ncn3[C@@H]1O[C@H](CO)[C@@H](O)[C@H]1O)C2	CHEMBL392720	0
O=C(OCc1ccccc1)N1[C@H]2CC[C@H]1[C@H](Nc1ncnc3c1ncn3[C@@H]1O[C@H](CO)[C@@H](O)[C@H]1O)C2	CHEMBL240487	0
CC(C)(C)OC(=O)N1[C@H]2CC[C@H]1[C@H](Nc1ncnc3c1ncn3[C@@H]1O[C@H](CO)[C@@H](O)[C@H]1O)C2	CHEMBL240279	0
O=C(OCc1ccccc1)N1CC[C@@H](Nc2ncnc3c2ncn3[C@@H]2O[C@H](CO)[C@@H](O)[C@H]2O)C1	CHEMBL240278	0
CC(=O)N1CC[C@@H](Nc2ncnc3c2ncn3[C@@H]2O[C@H](CO)[C@@H](O)[C@H]2O)C1	CHEMBL391030	0
CC(C)(C)OC(=O)N1CC[C@@H](Nc2ncnc3c2ncn3[C@@H]2O[C@H](CO)[C@@H](O)[C@H]2O)C1	CHEMBL240277	0
COc1ccccc1CN1CCCn2c1nc1c2c(=O)n(C)c(=O)n1C	CHEMBL238419	0
C[C@@]1(O)[C@H](O)[C@@H](CO)O[C@H]1n1cnc2c(N[C@@H]3CCOC3)nc(Cl)nc21	CHEMBL400782	0
C[C@@]1(O)[C@H](O)[C@@H](CO)O[C@H]1n1cnc2c(N[C@@H]3CCOC3)ncnc21	CHEMBL400190	0
CNC(=S)OC[C@H]1O[C@@H](n2cnc3c(N[C@@H]4CCOC4)nc(Cl)nc32)[C@](C)(O)[C@@H]1O	CHEMBL254896	0
CNC(=O)OC[C@H]1O[C@@H](n2cnc3c(N[C@@H]4CCOC4)nc(Cl)nc32)[C@](C)(O)[C@@H]1O	CHEMBL254693	0
CNC(=O)OC[C@H]1O[C@@H](n2cnc3c(NC4CCCC4)nc(Cl)nc32)[C@](C)(O)[C@@H]1O	CHEMBL254064	0
CN1C(=O)C2Nc3cnccc3C2N(C)C1=O	CHEMBL408895	0
COc1cc(OCC(=O)N2CCc3ccccc3C2)ccc1-c1cc2c([nH]1)c(=O)n(C)c(=O)n2C	CHEMBL410066	0
Cc1cc2[nH]c3cnccc3c2c(C)c1O	CHEMBL458558	0
Cc1cc2c(c(C)c1O)c1cc[n+](C)cc1n2C	CHEMBL540656	0
Cc1cc2[nH]c3c[n+](C)ccc3c2c(C)c1O	CHEMBL541164	0
Cc1cc2c(c(C)c1O)c1ncccc1n2C	CHEMBL458947	0
Cc1cc2[nH]c3cccnc3c2c(C)c1O	CHEMBL458465	0
Cc1cc2c(c(C)c1O)c1ccncc1n2C	CHEMBL458409	0
COc1cc(-c2nc3c([nH]2)c(=O)n(C)c(=O)n3C)ccc1OCCN1CCOCC1	CHEMBL520212	0
C[C@@]1(O)[C@H](O)[C@@H](CCl)O[C@H]1n1cnc2c(NC3CCCC3)ncnc21	CHEMBL515330	0
C[C@@]1(O)[C@H](O)[C@@H](CCl)O[C@H]1n1cnc2c(NC3CCCC3)nc(Cl)nc21	CHEMBL478071	0
C[C@@]1(O)[C@H](O)[C@@H](CCl)O[C@H]1n1cnc2c(NC3CC4CCC3C4)ncnc21	CHEMBL477665	0
C[C@@]1(O)[C@H](O)[C@@H](CCl)O[C@H]1n1cnc2c(NC3CC4CCC3C4)nc(Cl)nc21	CHEMBL514701	0
C[C@@]1(O)[C@H](O)[C@@H](CSc2ccccc2F)O[C@H]1n1cnc2c(NC3CCCC3)ncnc21	CHEMBL523934	0
C[C@@]1(O)[C@H](O)[C@@H](CSc2ccccc2F)O[C@H]1n1cnc2c(NC3CCCC3)nc(Cl)nc21	CHEMBL489226	0
C[C@@]1(O)[C@H](O)[C@@H](CSc2ccccc2F)O[C@H]1n1cnc2c(NC3CC4CCC3C4)ncnc21	CHEMBL489428	0
C[C@@]1(O)[C@H](O)[C@@H](CSc2ccccc2F)O[C@H]1n1cnc2c(NC3CC4CCC3C4)nc(Cl)nc21	CHEMBL489628	0
O[C@@H]1[C@@H](CSc2ccccc2F)O[C@@H](n2cnc3c(NC4CCOC4)ncnc32)[C@@H]1O	CHEMBL489638	0
C[C@@]1(O)[C@H](O)[C@@H](CO)O[C@H]1n1cnc2c(NC3CC4CCC3C4)nc(Cl)nc21	CHEMBL489639	0
Cn1cnc2ncnc(N)c21	CHEMBL449346	0
CCn1cnc2ncnc(N)c21	CHEMBL451363	0
CCCn1cnc2ncnc(N)c21	CHEMBL449108	0
CC(C)n1cnc2ncnc(N)c21	CHEMBL448396	0
CCC(C)n1cnc2c(N)ncnc21	CHEMBL466044	0
CCC(C)n1cnc2ncnc(N)c21	CHEMBL475030	0
CC(C)Cn1cnc2c(N)ncnc21	CHEMBL503566	0
CC(C)Cn1cnc2ncnc(N)c21	CHEMBL472147	0
Nc1ncnc2c1ncn2C1CCCCC1	CHEMBL63783	0
Nc1ncnc2c1nc(Br)n2C1CCCCC1	CHEMBL516238	0
Nc1ncnc2c1ncn2C1CCCCCC1	CHEMBL62835	0
Nc1ncnc2c1nc(Br)n2C1CCCCCC1	CHEMBL474396	0
Nc1ncnc2c1ncn2CCO	CHEMBL95897	0
Nc1ncnc2ncn(CCO)c12	CHEMBL466850	0
Nc1ncnc2ncn(CCCO)c12	CHEMBL447623	0
CC(O)Cn1cnc2ncnc(N)c21	CHEMBL475456	0
Nc1ncnc2ncn(CC(O)CO)c12	CHEMBL474623	0
Cn1c(=O)c2[nH]c3cnccc3c2n(C)c1=O	CHEMBL569844	0
CCC(=O)N(c1ccc(C(C)NC(=O)[C@H]2O[C@@H](c3nc4ncnc(NC5CCCC5)c4[nH]3)[C@H](O)[C@@H]2O)cc1)C1CCN(CCc2ccccc2)CC1	CHEMBL572393	0
CNC(=O)[C@H]1O[C@@H](n2cnc3c(=NOC)[nH]c(C#Cc4ccc(OC)cc4)nc32)[C@H](O)[C@@H]1O	CHEMBL573950	0
CNC(=O)[C@H]1O[C@@H](n2cnc3c(NC)nc(C#Cc4ccccc4)nc32)[C@H](O)[C@@H]1O	CHEMBL574602	0
CNC(=O)[C@H]1O[C@@H](n2cnc3c(NC)nc(C#Cc4ccc(F)cc4)nc32)[C@H](O)[C@@H]1O	CHEMBL573269	0
CNC(=O)[C@H]1O[C@@H](n2cnc3c(NC)nc(C#Cc4ccccn4)nc32)[C@H](O)[C@@H]1O	CHEMBL575027	0
Nc1nc2nn(CCc3ccccc3)cc2c2nc(-c3ccc(Br)cc3)nn12	CHEMBL1089902	0
Cn1cc2c(nc(NC(=O)c3ccccc3)n3nc(-c4ccc(F)cc4)nc23)n1	CHEMBL1091134	0
Cn1cc2c(nc(NC(=O)c3ccccc3)n3nc(-c4ccc(Cl)cc4)nc23)n1	CHEMBL1089905	0
Cn1cc2c(nc(NC(=O)c3ccccc3)n3nc(-c4ccc(Br)cc4)nc23)n1	CHEMBL1090241	0
COc1ccc(-c2nc3c4cn(C)nc4nc(NC(=O)c4ccccc4)n3n2)cc1	CHEMBL1090242	0
Cn1cc2c(nc(NC(=O)c3ccccc3)n3nc(-c4ccc([N+](=O)[O-])cc4)nc23)n1	CHEMBL1090243	0
O=C(Nc1nc2nn(CCc3ccccc3)cc2c2nc(-c3ccc(Br)cc3)nn12)c1ccccc1	CHEMBL1091267	0
Cn1cc2c(nc(NC(=O)Cc3ccccc3)n3nc(-c4ccc(Br)cc4)nc23)n1	CHEMBL1091937	0
COc1ccc(-c2nc3c4cn(C)nc4nc(NC(=O)Cc4ccccc4)n3n2)cc1	CHEMBL1091938	0
Cn1cc2c(nc(NC(=O)Cc3ccccc3)n3nc(-c4ccc([N+](=O)[O-])cc4)nc23)n1	CHEMBL1090461	0
C[C@H]1Cc2c([nH]c3cc(Cl)c(F)cc23)[C@@]2(N1)C(=O)Nc1ccc(Cl)cc12	CHEMBL1082723	0
Cn1cc2c(nc(N)n3nc(-c4ccc(-c5ccccc5)cc4)nc23)n1	CHEMBL1834621	0
Cn1cc2c(nc(NC(=O)Nc3ccccc3)n3nc(-c4ccc(C(F)(F)F)cc4)nc23)n1	CHEMBL1834624	0
Cn1cc2c(nc(NC(=O)Nc3ccccc3)n3nc(-c4ccc(-c5ccccc5)cc4)nc23)n1	CHEMBL1834625	0
Cn1cc2c(nc(NC(=O)Nc3ccc(F)cc3)n3nc(-c4ccc(C(F)(F)F)cc4)nc23)n1	CHEMBL1834628	0
Cn1cc2c(nc(NC(=O)Nc3ccc(F)cc3)n3nc(-c4ccc(-c5ccccc5)cc4)nc23)n1	CHEMBL1834629	0
COc1ccc(NC(=O)Nc2nc3nn(C)cc3c3nc(-c4ccc(C(F)(F)F)cc4)nn23)cc1	CHEMBL1834695	0
COc1ccc(NC(=O)Nc2nc3nn(C)cc3c3nc(-c4ccc(-c5ccccc5)cc4)nn23)cc1	CHEMBL1834696	0
O=C(Nc1nc2nn(CCc3ccccc3)cc2c2nc(-c3ccc(Cl)cc3)nn12)c1ccccc1	CHEMBL1834698	0
COc1ccc(-c2nc3c4cn(CCc5ccccc5)nc4nc(NC(=O)c4ccccc4)n3n2)cc1	CHEMBL1834699	0
CCCCCCCCc1ccc(O)cc1	CHEMBL195437	0
Clc1ccc(COC(Cn2ccnc2)c2ccc(Cl)cc2Cl)cc1	CHEMBL808	0
CN(CCOc1ccc(C[C@H](Nc2ccccc2C(=O)c2ccccc2)C(=O)O)cc1)c1ccccn1	CHEMBL434063	0
C#C[C@]1(O)CC[C@H]2[C@@H]3CCc4cc(O)ccc4[C@H]3CC[C@@]21C	CHEMBL691	0
O=c1c(-c2ccc(O)cc2)coc2cc(O)cc(O)c12	CHEMBL44	0
Clc1ccccc1C(c1ccccc1)(c1ccccc1)n1ccnc1	CHEMBL104	0
Clc1ccc(COC(Cn2ccnc2)c2ccc(Cl)cc2Cl)c(Cl)c1	CHEMBL91	0
NCCNc1nc(NCCN)n2nc(-c3ccco3)nc2n1	CHEMBL1927443	0
Cn1c(=O)c2c(nc3n2CCCN3[C@H]2CC[C@H](O)CC2)n(C)c1=O	CHEMBL2153621	0
CC(=O)O[C@H]1CC[C@H](N2CCCn3c2nc2c3c(=O)n(C)c(=O)n2C)CC1	CHEMBL2153622	0
COc1nc(N)c(C#N)c(-c2ccc3c(c2)OCO3)c1C#N	CHEMBL142641	0
O=C1NCCC12O[C@@H](n1cnc3c(NCc4cccc(I)c4)ncnc31)[C@H](O)[C@@H]2O	CHEMBL2181969	0
Cn1cc2c(nc(NC34CC5CC(CC(C5)C3)C4)n3nc(-c4ccco4)nc23)n1	CHEMBL2180928	0
COc1nc2nn(C)cc2c2nc(-c3ccco3)nn12	CHEMBL2181145	0
Cn1cc2c(nc(Cl)n3nc(-c4ccco4)nc23)n1	CHEMBL2181144	0
Cn1cc2c(nc(=O)n3nc(-c4ccco4)nc23)[nH]1	CHEMBL2181165	0
CC(C)(C)C(=O)c1cc2c([nH]c1=O)CC(c1ccccc1)CC2=O	CHEMBL2261736	0
Cc1ccc(C(=O)Nc2nc(-c3ccccc3)c(-c3nc(N)c4c(C)c(C)sc4n3)s2)cc1	CHEMBL2391846	0
COc1ccc(C(=O)Nc2nc(-c3ccccc3)c(-c3nc(N)c4c(C)c(C)sc4n3)s2)cc1	CHEMBL2391845	0
Cc1sc2[nH]c(-c3sc(NC(=O)c4ccco4)nc3-c3ccccc3)nc(=O)c2c1C	CHEMBL2391838	0
Nc1nc(-c2sc(NC(=O)c3ccco3)nc2-c2ccccc2)nc2sc3c(c12)CCCC3	CHEMBL2391836	0
CC1(C)OC(=O)N([C@H]2CC[C@H](c3cnc(N)c(-c4ncccn4)c3)CC2)[C@H]1c1ccccc1	CHEMBL3099716	0
CC(C)(C)Cn1cc2c(Cl)nc(N(C(=O)c3ccccc3)C(=O)c3ccccc3)nc2n1	CHEMBL3114161	0
CCOC(=O)c1nc(NC(=O)c2ccc(C)cc2)nc2nn(CC(C)(C)C)cc12	CHEMBL3114168	0
CCOC(=O)c1nc(NC(=O)c2ccc(C(F)(F)F)cc2)nc2nn(CC(C)(C)C)cc12	CHEMBL3114167	0
CC(C)(C)Cn1cc2c(Cl)nc(NC(=O)c3ccc(C(F)(F)F)cc3)nc2n1	CHEMBL3114153	0
Cn1cc2c(Cl)nc(NC(=O)Cc3ccccc3)nc2n1	CHEMBL3114163	0
Cn1cc2c(Cl)nc(NC(=O)c3ccc(C(F)(F)F)cc3)nc2n1	CHEMBL3114145	0
Cn1cc2c(Cl)nc(NC(=O)c3ccccc3)nc2n1	CHEMBL3114143	0
CC(C)(C)Cn1cc2c(Cl)nc(NC(=O)Cc3ccccc3)nc2n1	CHEMBL3114165	0
Cn1cc2c(Cl)nc(NC(=O)c3ccc(F)cc3)nc2n1	CHEMBL3114144	0
Cn1cc2c(Cl)nc(N(C(=O)c3ccccc3)C(=O)c3ccccc3)nc2n1	CHEMBL3114159	0
O=C(Nc1nc(Cl)c2cn(CCc3ccccc3)nc2n1)c1ccc(C(F)(F)F)cc1	CHEMBL3114157	0
Cc1ccc(C(=O)Nc2nc(Cl)c3cn(C)nc3n2)cc1	CHEMBL3114146	0
CCOC(=O)c1cnc(NC(=O)Cc2ccccc2)n2nc(-c3ccco3)nc12	CHEMBL3314885	0
O=C(Nc1ncc(C(=O)O)c2nc(-c3ccco3)nn12)NC1CCCCC1	CHEMBL3314886	0
CCOC(=O)c1cnc(N2CCCC2)n2nc(-c3ccco3)nc12	CHEMBL3314906	0
CCOC(=O)c1cnc(N2CCOCC2)n2nc(-c3ccco3)nc12	CHEMBL3314910	0
CCOC(=O)c1cnc(=NN2CCOCC2)n2[nH]c(-c3ccco3)nc12	CHEMBL3314912	0
CNc1ncc(C(=O)O)c2nc(-c3ccco3)nn12	CHEMBL3314915	0
CCCCCNc1ncc(C(=O)O)c2nc(-c3ccco3)nn12	CHEMBL3314917	0
CCCCC(CC)CNc1ncc(C(=O)O)c2nc(-c3ccco3)nn12	CHEMBL3314919	0
O=C(O)c1cnc(NC2CCCC2)n2nc(-c3ccco3)nc12	CHEMBL3314921	0
O=C(O)c1cnc(NCC2CCCCC2)n2nc(-c3ccco3)nc12	CHEMBL3314922	0
COc1ccc(CNc2ncc(C(=O)O)c3nc(-c4ccco4)nn23)cc1	CHEMBL3314925	0
O=C(O)c1cnc(NCc2ccc(Cl)cc2)n2nc(-c3ccco3)nc12	CHEMBL3314927	0
O=C(O)c1cnc(NCc2ccc(C(F)(F)F)cc2)n2nc(-c3ccco3)nc12	CHEMBL3314928	0
O=C(O)c1cnc(NCc2ccc(-c3ccccc3)cc2)n2nc(-c3ccco3)nc12	CHEMBL3314929	0
O=C(O)c1cnc(NC(c2ccccc2)c2ccccc2)n2nc(-c3ccco3)nc12	CHEMBL3314930	0
CCOC(=O)c1c(NC(=O)c2sc(Nc3ccc(C)cc3)nc2C)sc2c1CCCC2	CHEMBL3403725	0
CCOC(=O)c1c(NC(=O)c2sc(Nc3ccc(C)cc3)nc2-c2ccc(C)cc2)sc2c1CCCC2	CHEMBL3403726	0
CCOC(=O)c1c(NC(=O)c2sc(Nc3ccccc3)nc2-c2ccc(C)cc2)sc2c1CCCC2	CHEMBL3403728	0
CCOC(=O)c1c(NC(=O)c2sc(Nc3ccc(C)cc3)nc2N(C)C)sc2c1CCCC2	CHEMBL3403729	0
CCOC(=O)c1c(NC(=O)c2sc(=NOC(C)=O)[nH]c2N(C)C)sc2c1CCCC2	CHEMBL3403730	0
CN(C)c1nc(Nc2ccccc2)sc1C(=O)Nc1sc2c(c1C#N)CCCC2	CHEMBL3403731	0
Cc1ccc(Nc2nc(N(C)C)c(C(=O)Nc3sc4c(c3C(N)=O)CCCC4)s2)cc1	CHEMBL3403733	0
COc1ccc(Nc2nc(-c3ccc(C)cc3)c(C(=O)Nc3sc4c(c3C#N)CCCC4)s2)cc1	CHEMBL3403736	0
CCOC(=O)c1c(NC(=O)c2sc(Nc3ccc(C)cc3)nc2C)sc(C(=O)OC)c1C	CHEMBL3403740	0
CCOC(=O)c1c(NC(=O)c2sc(Nc3ccc(C)cc3)nc2N(C)C)sc(C(=O)OC)c1C	CHEMBL3403741	0
CCOC(=O)c1nc(NC(=O)c2ccc(C(F)(F)F)cc2)nc2nn(C(C)C)cc12	CHEMBL3410308	0
CCOC(=O)c1nc(NC(=O)c2ccc(C)cc2)nc2nn(C)cc12	CHEMBL3410305	0
CCOC(=O)c1nc(NC(=O)c2ccc(C(F)(F)F)cc2)nc2nn(C)cc12	CHEMBL3410304	0
CCOC(=O)c1nc(NC(=O)c2ccc(F)cc2)nc2nn(C)cc12	CHEMBL3410303	0
CCOC(=O)c1nc(NC(=O)c2ccccc2)nc2nn(C)cc12	CHEMBL3410302	0
NC(=O)c1nc(N)nc2nn(CCc3ccccc3)cc12	CHEMBL3410297	0
CC(C)(C)Cn1cc2c(C(N)=O)nc(N)nc2n1	CHEMBL3410296	0
CCOC(=O)c1nc(N(C(=O)c2ccccc2)C(=O)c2ccccc2)nc2nn(CCc3ccccc3)cc12	CHEMBL3410321	0
CCOC(=O)c1nc(N(C(=O)c2ccccc2)C(=O)c2ccccc2)nc2nn(C(C)C)cc12	CHEMBL3410320	0
CCOC(=O)c1nc(N(C(=O)c2ccc(F)c(F)c2)C(=O)c2ccc(F)c(F)c2)nc2nn(C)cc12	CHEMBL3410319	0
CCOC(=O)c1nc(N(C(=O)c2ccc(Br)cc2)C(=O)c2ccc(Br)cc2)nc2nn(C)cc12	CHEMBL3410318	0
CCOC(=O)c1nc(N(C(=O)c2ccccc2)C(=O)c2ccccc2)nc2nn(C)cc12	CHEMBL3410317	0
CCOC(=O)c1nc(NC(=O)c2ccc(Cl)c(Cl)c2)nc2nn(CCc3ccccc3)cc12	CHEMBL3410316	0
CCCC[C@H](NC(=O)[C@H]1CC[C@H]2c3[nH]c4ccccc4c3CCN2C1)C(=O)N[C@@H](Cc1ccc(F)cc1)C(=O)N1C[C@@H](N)C[C@H]1C(N)=O	CHEMBL3423400	0
CCCC[C@H](NC(=O)CCCCCNC(=O)[C@H]1CC[C@H]2c3[nH]c4ccccc4c3CCN2C1)C(=O)N[C@@H](Cc1ccc(O)cc1)C(=O)N[C@@H](CCCCN)C(N)=O	CHEMBL3423401	0
NCCCC[C@H](NC(=O)[C@H](Cc1c[nH]c2ccccc12)NC(=O)[C@@H]1CCCN1C(=O)CCCCCNC(=O)[C@H]1CC[C@@H]2c3[nH]c4ccccc4c3CCN2C1)C(N)=O	CHEMBL3423402	0
NCCCC[C@H](NC(=O)[C@H](Cc1ccc(F)c(F)c1)NC(=O)[C@@H]1CCCN1C(=O)CCCCCNC(=O)[C@H]1CC[C@@H]2c3[nH]c4ccccc4c3CCN2C1)C(N)=O	CHEMBL3423403	0
CCCC[C@H](NC(=O)[C@H]1CC[C@@H]2c3[nH]c4ccccc4c3CCN2C1)C(=O)N[C@@H](Cc1ccc(O)cc1)C(=O)N[C@@H](CCCCN)C(N)=O	CHEMBL3423404	0
CCCC[C@H](NC(=O)CCCCCNC(=O)[C@H]1CC[C@@H]2c3[nH]c4ccccc4c3CCN2C1)C(=O)N[C@@H](Cc1c[nH]c2ccccc12)C(=O)N1C[C@@H](N)C[C@H]1C(N)=O	CHEMBL3423405	0
CCCC[C@H](NC(=O)[C@H]1CC[C@@H]2c3[nH]c4ccccc4c3CCN2C1)C(=O)N[C@@H](Cc1ccc(F)c(F)c1)C(=O)N[C@@H](CCCCN)C(N)=O	CHEMBL3423407	0
CCCC[C@H](NC(=O)CCCCCNC(=O)[C@H]1CC[C@@H]2c3[nH]c4ccccc4c3CCN2C1)C(=O)N[C@@H](Cc1ccc(F)cc1)C(=O)N1C[C@@H](N)C[C@H]1C(N)=O	CHEMBL3423408	0
CCCC[C@H](NC(=O)CCCCCNC(=O)[C@H]1CC[C@@H]2c3[nH]c4ccccc4c3CCN2C1)C(=O)N[C@@H](Cc1ccc(F)cc1)C(=O)N[C@@H](CCCCN)C(N)=O	CHEMBL3423409	0
CCN(CC)c1ncnc2sc(Nc3ccc(Cl)cc3)nc12	CHEMBL3088349	0
CN(C)c1ncnc2sc(Nc3ccc(Cl)cc3)nc12	CHEMBL3088350	0
c1ccc(Nc2nc3c(N4CCC(N5CCCCC5)CC4)ncnc3s2)cc1	CHEMBL3088346	0
Clc1ccc(Nc2nc3c(N4CCCCC4)ncnc3s2)cc1	CHEMBL3088348	0
CN1CCN(c2ncnc3sc(Nc4ccc(Cl)cc4)nc23)CC1	CHEMBL3088333	0
O=C(/C=C/c1c(-c2ccccc2)nn2ccccc12)N1CCCC[C@@H]1CCO	CHEMBL440115	0
COC(=O)C1=C2C=CN(C)C=C2c2nc(-c3ccccc3)nn2C1	CHEMBL52735	0
c1nc2nc(Nc3ccc(N4CCOCC4)cc3)nc(NC3CC4CCC3C4)c2[nH]1	CHEMBL446698	0
c1ccc(Nc2nc(NC3CCCCCCC3)c3[nH]cnc3n2)cc1	CHEMBL365026	0
c1ccc(Oc2nc(NC3CCCCC3)c3[nH]cnc3n2)cc1	CHEMBL363419	0
c1ccc(Sc2nc(NC3CCCCC3)c3[nH]cnc3n2)cc1	CHEMBL191270	0
O=[N+]([O-])c1cc(O)c2c(c1)S(=O)(=O)NC(Nc1ccccc1Oc1ccccc1)=N2	CHEMBL399203	0
Nc1c(/C=N/c2ccccc2)ccc2c1C(=O)c1ccccc1C2=O	CHEMBL602486	0
CCCCNC(=O)c1cc(N)c2c(c1N)C(=O)c1ccccc1C2=O	CHEMBL601628	0
Nc1c(C(=O)Nc2ccc(F)cc2)sc2nc3c(cc12)N1CCC3CC1	CHEMBL601207	0
Nc1c(C(=O)Nc2ccc([N+](=O)[O-])cc2)sc2nc3c(cc12)CCCC3	CHEMBL601208	0
CC(=O)c1ccc(NC(=O)c2sc3nc4c(cc3c2N)CCCC4)cc1	CHEMBL600388	0
Nc1c(C(=O)Nc2ccccc2Cl)sc2ncccc12	CHEMBL600593	0
COc1ccc(Nc2nc(N)nc(CSc3nnc(N)s3)n2)cc1	CHEMBL603967	0
Cc1ccc(Nc2nc(N)nc(CSCCO)n2)cc1	CHEMBL602069	0
Cc1ccc(Nc2nc(N)nc(CSC(C)C(=O)N3CCCCCC3)n2)cc1	CHEMBL602265	0
Cc1ccc(Nc2nc(N)nc(CSCC(=O)NC3CC3)n2)cc1	CHEMBL602266	0
Cc1ccccc1NC(=O)CSCc1nc(N)nc(Nc2ccccc2C)n1	CHEMBL605584	0
Nc1nc(CSc2nnc3ccccn23)nc(Nc2ccc(F)cc2)n1	CHEMBL601224	0
Nc1nc(CSc2nnc(N)s2)nc(Nc2ccc(F)cc2)n1	CHEMBL600404	0
CC(=O)Oc1cccc(-c2nc(C(N)=O)c(N)o2)c1	CHEMBL599548	0
COCCOC(=O)c1sc(N)c(C#N)c1C	CHEMBL600609	0
CC(=O)c1snc(Nc2cc(Cl)ccc2F)c1N	CHEMBL600610	0
CC(Sc1nc(N)c(C(=O)Nc2ccccc2)cc1C#N)C(=O)NCc1ccccc1Cl	CHEMBL605791	0
COc1ccc(-n2ccnc2SCC(=O)c2c(N)n(C3CC3)c(=O)[nH]c2=O)cc1	CHEMBL606031	0
Nc1ncnc2sc3c(c12)CCN(C(=O)CN1CSCC1=O)C3	CHEMBL600818	0
Cc1ccc2oc(=N)c3c(N)nc(-c4ccc5c(c4)OCO5)cc3c2c1	CHEMBL602480	0
CN(C(=O)CSc1nc(N)nn1-c1ccccc1)c1ccccc1	CHEMBL602481	0
Nc1ccc(-c2nc3c(N)cccc3[nH]2)cc1	CHEMBL602467	0
CCOC(=O)c1cnc(SCC(=O)O)nc1N	CHEMBL601658	0
CCOC(=O)c1cnc(SCCC(N)=O)nc1N	CHEMBL591926	0
Cc1cc2oc(N)c(C=O)c(=O)c2cc1C	CHEMBL601874	0
Cc1ccc(C(=O)CSc2nc(N)c(C#N)c(-c3cccs3)c2C#N)c(C)c1	CHEMBL603493	0
COC(=O)c1c(N)oc2c(-c3ccc(C)cc3)c3c(C(=O)OC)c(N)oc3cc12	CHEMBL600861	0
Nc1nc(SCCCCC(=O)O)c2[nH]cnc2n1	CHEMBL601021	0
Nc1ncnc2nc(SCCC(=O)O)[nH]c12	CHEMBL510282	0
Cc1nc2ccccc2cc1C(=O)OCC(=O)c1c(N)n(C)c(=O)[nH]c1=O	CHEMBL600416	0
CCOC(=O)c1cc(-c2ccc(Br)cc2)cc2c(N)sc(Br)c12	CHEMBL601229	0
Nc1c(Nc2ccccc2C(=O)O)c2ccccc2oc1=O	CHEMBL605783	0
CCCN(CCCNC(=O)CCCCCCCCCCCNC(=O)OC(C)(C)C)CCc1cccc2c1CC(=O)N2	CHEMBL3394254	0
COc1ccc(Nc2c(-c3ccc4nccnc4c3)c(C)nn2-c2ccccc2C)c(C(=O)O)c1	CHEMBL1258170	0
Cc1ccccc1-n1nc(C)c(-c2ccc3nccnc3c2)c1Nc1ccc(Cl)cc1C(=O)O	CHEMBL1258283	0
Cc1ccc(Nc2c(-c3ccc4nccnc4c3)c(C)nn2-c2ccccc2C)c(C(=O)O)c1	CHEMBL1258284	0
Cc1ccccc1-n1nc(C)c(-c2ccc3nccnc3c2)c1Nc1ccccc1C(=O)O	CHEMBL1258396	0
COc1ccc(Nc2c(-c3ccc4nccnc4c3)c(C)nn2C2CCCCC2)c(C(=O)O)c1	CHEMBL1258505	0
CCc1ccccc1-n1nc(C)c(-c2ccc3nccnc3c2)c1Nc1ccc(OC)cc1C(=O)O	CHEMBL1258621	0
Cc1ccccc1-n1nc(C(F)(F)F)c(-c2ccc3nccnc3c2)c1Nc1ccccc1C(=O)O	CHEMBL1258622	0
CCc1nn(-c2ccccc2C)c(Nc2ccccc2C(=O)O)c1-c1ccc2nccnc2c1	CHEMBL1258730	0
Cc1ccccc1-n1ncc(-c2ccc3nccnc3c2)c1Nc1ccccc1C(=O)O	CHEMBL1258731	0
Cc1ccccc1-n1nc(C)c(-c2cc(F)c3nccnc3c2)c1Nc1ccccc1C(=O)O	CHEMBL1258850	0
COc1ccc(Nc2c(-c3ccc4nccnc4c3)c(C)nn2-c2ccccc2Cl)c(C(=O)O)c1	CHEMBL1258506	0
CCOC(=O)CCCNc1nc(NCCc2ccc(OCCCC(=O)OCC)cc2)nc2nc(-c3ccco3)nn12	CHEMBL2381772	0
CCn1c(=O)c2c(nc(/C=C/c3ccc(OCCCC(=O)NCCCCCCCCCCCC(=O)OC)c(OC)c3)n2C)n(CC)c1=O	CHEMBL2381769	0
Cn1cnc2c(N)nc(NCCc3ccc(O)cc3)nc21	CHEMBL2381765	0
CCOC(=O)CCCNc1nc(NCCc2ccc(O)cc2)nc2nc(-c3ccco3)nn12	CHEMBL2381771	0
CCn1c(=O)c2c(nc(/C=C/c3ccc(OCCCC(=O)NCCCCCC(=O)OC)c(OC)c3)n2C)n(CC)c1=O	CHEMBL2381768	0
CCn1c(=O)c2c(nc(/C=C/c3ccc(O)c(OC)c3)n2C)n(CC)c1=O	CHEMBL2381766	0
Cn1c(-n2ccnn2)nc2c(N)nc(NCCc3ccc(O)cc3)nc21	CHEMBL2381764	0
