# Supplementary material for: Ligand-Based Pharmacophore Modeling Using Novel 3D Pharmacophore Signatures
Source: Molecules. 2018 Nov 27;23(12):3094. doi: 10.3390/molecules23123094 (PMC6321403; doi:10.3390/molecules23123094)
Supplement: Supplementary file 1 [file molecules-23-03094-s001.zip › ache.smi]

c1ccc2c(c1)ccc[n+]2CCCCCCCCCCC[n+]1cccc2ccccc21	CHEMBL105257	1
CC(C)c1ccc(NC(=O)Oc2ccc3c(c2)[C@]2(C)CCN(CCc4ccccc4)[C@@H]2N3C)cc1	CHEMBL1080386	1
CCn1c(C)nc2cc(C(=O)CCC3CCN(Cc4ccccc4)CC3)ccc21	CHEMBL1082435	1
Cc1nc2ccc(C(=O)CCC3CCN(Cc4ccccc4)CC3)cc2s1	CHEMBL1084275	1
CN1C(=O)Cc2cc3c(CCC4CCN(Cc5ccccc5)CC4)noc3cc21	CHEMBL1179697	1
CC[N+](CC)(CC)CCOc1ccc(C(=O)NCCCCCC(=O)NNc2c3c(nc4ccccc24)CCCC3)cc1	CHEMBL1203985	1
CNC(=O)Oc1ccc2c(c1)SC[C@@H]1CCN(C)[C@H]21	CHEMBL1243329	1
CCOC(=O)C1=CN(C)c2cccc(OC(=O)N(C)C)c2C1	CHEMBL1243360	1
CCN(CCCOc1ccc2c(=O)c3ccccc3oc2c1)Cc1cccc(OC(=O)NC)c1	CHEMBL128202	1
CN(CCCOc1ccc2c(=O)c3ccccc3oc2c1)Cc1cccc(OC(=O)Nc2ccccc2)c1	CHEMBL128260	1
CCCN(CCCOc1ccc2c(=O)c3ccccc3oc2c1)Cc1cccc(OC(=O)NC)c1	CHEMBL131219	1
Nc1c2c(nc3cccc(Cl)c13)CCCC2	CHEMBL134057	1
O=C(O)CCCC[C@@H]1CCSS1	CHEMBL134342	1
CCC1=CC2Cc3nc4cc(Cl)ccc4c(N)c3C(C1)C2	CHEMBL143812	1
O=C(CCC1CCN(Cc2ccccc2)CC1)c1cc2c3c(c1)CC(=O)N3CCC2	CHEMBL1651129	1
O=C(CCC1CCN(Cc2ccccc2)CC1)c1cc2c3c(c1)CCN3C(=O)CC2	CHEMBL1651130	1
O=C(CCC1CCN(Cc2ccccc2F)CC1)c1cc2c3c(ccn3C(=O)CC2)c1	CHEMBL1651131	1
O=C(CCC1CCN(Cc2cccc(F)c2)CC1)c1cc2c3c(ccn3C(=O)CC2)c1	CHEMBL1651132	1
O=C(CCC1CCN(Cc2ccccc2Cl)CC1)c1cc2c3c(ccn3C(=O)CC2)c1	CHEMBL1651133	1
O=C(CCC1CCN(Cc2cccc(Cl)c2)CC1)c1cc2c3c(ccn3C(=O)CC2)c1	CHEMBL1651134	1
O=C(CCC1CCN(Cc2ccccc2O)CC1)c1cc2c3c(ccn3C(=O)CC2)c1	CHEMBL1651139	1
O=C(CCC1CCN(Cc2cccc(O)c2)CC1)c1cc2c3c(ccn3C(=O)CC2)c1	CHEMBL1651140	1
O=C(CCC1CCN(Cc2cccc([N+](=O)[O-])c2)CC1)c1cc2c3c(ccn3C(=O)CC2)c1	CHEMBL1651243	1
c1ccc(CN2CCC(CCc3noc4cc(C5CCCCC5)ccc34)CC2)cc1	CHEMBL1651247	1
O=C(CCC1CCN(Cc2ccc(F)cc2)CC1)c1cc2c3c(ccn3C(=O)CC2)c1	CHEMBL1651248	1
O=C(CCC1CCN(Cc2ccc(O)cc2)CC1)c1cc2c3c(ccn3C(=O)CC2)c1	CHEMBL1651249	1
COc1cccc(CN(C)[C@@H](C)[C@H]2[C@H](O)C[C@@]3(C)[C@@H]4CC[C@H]5[C@]6(C)CSC(C(C)C)=N[C@H]6CC[C@@]56C[C@@]46C(=O)C[C@]23C)c1	CHEMBL1783514	1
COc1ccc(CN(C)[C@@H](C)[C@H]2[C@H](O)C[C@@]3(C)[C@@H]4CC[C@H]5[C@]6(C)CSC(C(C)C)=N[C@H]6CC[C@@]56C[C@@]46C(=O)C[C@]23C)cc1	CHEMBL1783515	1
CC(C)C1=N[C@H]2CC[C@]34C[C@]35C(=O)C[C@]3(C)[C@@H]([C@H](C)N(C)Cc6cccc(C(F)(F)F)c6)[C@H](O)C[C@@]3(C)[C@@H]5CC[C@H]4[C@]2(C)CS1	CHEMBL1783517	1
CC(C)C1=N[C@H]2CC[C@]34C[C@]35C(=O)C[C@]3(C)[C@@H]([C@H](C)N(C)Cc6ccc(C(F)(F)F)cc6)[C@H](O)C[C@@]3(C)[C@@H]5CC[C@H]4[C@]2(C)CS1	CHEMBL1783518	1
CC(C)C1=N[C@H]2CC[C@]34C[C@]35C(=O)C[C@]3(C)[C@@H]([C@H](C)N(C)Cc6ccccc6)[C@H](O)C[C@@]3(C)[C@@H]5CC[C@H]4[C@]2(C)CS1	CHEMBL1783525	1
COc1ccccc1CN(C)[C@@H](C)[C@H]1[C@H](O)C[C@@]2(C)[C@@H]3CC[C@H]4[C@]5(C)CSC(C(C)C)=N[C@H]5CC[C@@]45C[C@@]35C(=O)C[C@]12C	CHEMBL1783528	1
Nc1ccc2c(c1)c(-c1ccccc1)[n+](CCCNCCCNCCCNc1c3c(nc4ccccc14)CCCC3)c1cc(N)ccc21	CHEMBL179455	1
CCOCC[n+]1ccc(CCC(=O)C2Cc3cc(OC)c(OC)cc3S2)cc1	CHEMBL186264	1
CNC(=O)Oc1cccc2c1SCC1CCN(C)C21	CHEMBL190322	1
O=C(CCCC[C@H]1CCSS1)NCCCNc1c2c(nc3cc(Cl)ccc13)CCCC2	CHEMBL1912058	1
O=C(CCCC[C@@H]1CCSS1)NCCCNc1c2c(nc3cc(Cl)ccc13)CCCC2	CHEMBL1912059	1
O=C(CCCCc1cccs1)NCCCNc1c2c(nc3cc(Cl)ccc13)CCCC2	CHEMBL1912060	1
O=C(CCCCC1CCSS1)NCCCNc1c2c(nc3ccccc13)CCCC2	CHEMBL195179	1
Cc1c(N2CCN(C)CC2)nc2ccccc2c1C(=O)NCCCCCCCNc1c2c(nc3ccccc13)CCCC2	CHEMBL195241	1
Cc1c(Cl)nc2ccccc2c1C(=O)NCCCCCCCNc1c2c(nc3ccccc13)CCCC2	CHEMBL195418	1
CC1=C[C@@H]2Cc3nc4cc(Cl)ccc4c(N)c3[C@H](C1)C2	CHEMBL1994202	1
CC[N+](C)(CCCCCC(=O)N1CCC(CCC2CCN(C(=O)CCCCC[N+](C)(CC)Cc3ccccc3OC)CC2)CC1)Cc1ccccc1OC	CHEMBL19949	1
O=C(CCCCCCNc1c2c(nc3cc(Cl)cc(Cl)c13)CCCC2)NCCc1c[nH]c2ccccc12	CHEMBL199585	1
O=C(CCCCCCNc1c2c(nc3ccccc13)CCCC2)NCCc1c[nH]c2ccccc12	CHEMBL199670	1
CC1=CC2Cc3nc4cc(Cl)ccc4c(NCCCCCCNc4c5c(nc6ccccc46)CCCC5)c3C(C1)C2	CHEMBL2011483	1
CC1=CC2Cc3nc4cc(Cl)ccc4c(NCCCN(C)CCCNc4c5c(nc6ccccc46)CCCC5)c3C(C1)C2	CHEMBL2011487	1
CC1=CC2Cc3nc4cc(Cl)ccc4c(NCCCCCCNc4c5c(nc6cc(Cl)ccc46)CCCC5)c3C(C1)C2	CHEMBL2011491	1
CC1=CC2Cc3nc4cc(Cl)ccc4c(NCCCN(C)CCCNc4c5c(nc6cc(Cl)ccc46)CCCC5)c3C(C1)C2	CHEMBL2011495	1
COc1ccc2oc(C(=O)NCCCCCCCCCCNc3c4c(nc5ccccc35)CCCC4)cc(=O)c2c1	CHEMBL2019034	1
COc1cc(OC)c2c(=O)cc(C(=O)NCCCCCCCCCCNc3c4c(nc5cc(Cl)ccc35)CCCC4)oc2c1	CHEMBL2019038	1
COc1cc2oc(C(=O)NCCCCCCCCCCNc3c4c(nc5cc(Cl)ccc35)CCCC4)cc(=O)c2cc1OC	CHEMBL2019041	1
O=C(NCCCCCCCCCCNc1c2c(nc3cc(Cl)ccc13)CCCC2)c1cc(=O)c2cc(O)ccc2o1	CHEMBL2019044	1
COc1cc(O)c2c(=O)cc(C(=O)NCCCCCCCCCCNc3c4c(nc5cc(Cl)ccc35)CCCC4)oc2c1	CHEMBL2019048	1
O=C(NCCCCCCCCCCNc1c2c(nc3cc(Cl)ccc13)CCCC2)c1cc(=O)c2c(O)cc(O)cc2o1	CHEMBL2019049	1
O=C(NCCCCCCCCCCNc1c2c(nc3ccccc13)CCCC2)c1cc(=O)c2cc(O)c(O)cc2o1	CHEMBL2019052	1
O=C(CCCCCNc1c2c(nc3cccc(Cl)c13)CCCC2)NCCc1c[nH]c2ccccc12	CHEMBL202661	1
O=C(CCNCCNc1c2c(nc3ccccc13)CCCC2)N1CCN(CCNc2c3c(nc4ccccc24)CCCC3)CC1	CHEMBL2064471	1
N#Cc1cc(C#N)c(NCCCC2CCN(Cc3ccccc3)CC2)nc1N	CHEMBL2088785	1
CC1=C[C@@H]2Cc3nc4cc(Cl)ccc4c(NCCCN(C)CCCCNc4c5c(nc6cc(Cl)ccc46)CCCC5)c3[C@H](C1)C2	CHEMBL2113367	1
CC1=C[C@@H]2Cc3nc4cc(Cl)ccc4c(NCCCN(C)CCCCNc4c5c(nc6ccccc46)CCCC5)c3[C@H](C1)C2	CHEMBL2113368	1
CN(C)c1ccccc1CNCCCCCCCNc1c2c(nc3ccccc13)CCCC2	CHEMBL2147460	1
CN(C)c1ccccc1CNCCCCCCCCNc1c2c(nc3ccccc13)CCCC2	CHEMBL2147461	1
CN(C)c1ccccc1CNCCCCCCCCCNc1c2c(nc3ccccc13)CCCC2	CHEMBL2147462	1
COc1cc(C(=O)NCCCCCCCC(=O)NNc2c3c(nc4ccccc24)CCCC3)cc(OC)c1OC	CHEMBL216159	1
COc1cc(CCC(=O)NCCCCCC(=O)NNc2c3c(nc4ccccc24)CCCC3)cc(OC)c1OC	CHEMBL219264	1
COc1cc(C(=O)NCCCCCCC(=O)NNc2c3c(nc4ccccc24)CCCC3)cc(OC)c1OC	CHEMBL219569	1
CC[N+](C)(CCCCCC(=O)N1CCC(CCCC2CCN(C(=O)CCCCC[N+](C)(CC)Cc3ccccc3OC)CC2)CC1)Cc1ccccc1OC	CHEMBL221992	1
CCN(CCCCCC(=O)N1CCC(CCCC2CCN(C(=O)CCCCCN(CC)Cc3ccccc3OC)CC2)CC1)Cc1ccccc1OC	CHEMBL222378	1
CCN(CCCCCC(=O)N1CCC(C2CCN(C(=O)CCCCCN(CC)Cc3ccccc3OC)CC2)CC1)Cc1ccccc1OC	CHEMBL222904	1
CCN(CCCCCC(=O)N1CCC(CC2CCN(C(=O)CCCCCN(CC)Cc3ccccc3OC)CC2)CC1)Cc1ccccc1OC	CHEMBL222946	1
CNCOc1cccc(CN(C)CCCCCCCOc2ccc3c(=O)c4ccccc4oc3c2)c1	CHEMBL2236393	1
CCN(CCCCCOc1ccc2c(=O)c3ccccc3oc2c1)Cc1cccc(OC(=O)NC)c1	CHEMBL2236394	1
CCN(CCCCCNC1=CC(=O)C(NCCCCCN(CC)Cc2ccccc2OC)=CC1=O)Cc1ccccc1OC	CHEMBL230702	1
O=C(CCCNc1c2c(nc3ccccc13)CCCC2)CCCNc1c2c(nc3ccccc13)CCCC2	CHEMBL238230	1
CCN(CCCCCCNC1=C(F)C(=O)C(NCCCCCCN(CC)Cc2ccccc2OC)=C(F)C1=O)Cc1ccccc1OC	CHEMBL243055	1
CCN(CCCCCCNC1=C(Cl)C(=O)C(NCCCCCCN(CC)Cc2ccccc2OC)=C(Cl)C1=O)Cc1ccccc1OC	CHEMBL243056	1
CCN(CCCCCCNC1=C(Br)C(=O)C(NCCCCCCN(CC)Cc2ccccc2OC)=C(Br)C1=O)Cc1ccccc1OC	CHEMBL243062	1
CCN(CCCCCCNC1=C(C)C(=O)C(NCCCCCCN(CC)Cc2ccccc2OC)=C(C)C1=O)Cc1ccccc1OC	CHEMBL243269	1
CCN(CCCNC1=CC(=O)C(NCCCN(CC)Cc2ccccc2OC)=CC1=O)Cc1ccccc1OC	CHEMBL243271	1
CCN(CCCCCCCNC1=CC(=O)C(NCCCCCCCN(CC)Cc2ccccc2OC)=CC1=O)Cc1ccccc1OC	CHEMBL243273	1
O=C(CCc1ccc2nc(-c3ccccc3)c3c(c2c1)OCCC3)NCCCCCNc1c2c(nc3cc(Cl)ccc13)CCCC2	CHEMBL2448076	1
COc1ccc(-c2cc3c(c(=O)o2)C[C@]2(O)[C@@]4(C)C(=O)C=CC(C)(C)[C@]4(O)CC[C@@]2(C)O3)cc1OC	CHEMBL283509	1
Oc1c(CNCCCCCCCCCNc2c3c(nc4ccccc24)CCCC3)ccc2cccnc12	CHEMBL3215602	1
Cc1ccc2ccc(CNCCCCCCCCNc3c4c(nc5ccccc35)CCCC4)c(O)c2n1	CHEMBL3215816	1
CC1=CC2Cc3nc4cc(Cl)ccc4c(NCCCCCCCNc4c5c(nc6ccccc46)CCCC5)c3C(C1)C2	CHEMBL3215882	1
CC1=CC2Cc3nc4cc(Cl)ccc4c(NCCCCCCCCCNc4c5c(nc6ccccc46)CCCC5)c3C(C1)C2	CHEMBL3216116	1
COc1cc2c(cc1OC)CC(CC1CCN(CCNc3c4c(nc5ccccc35)CCCC4)CC1)C2	CHEMBL3216208	1
COc1cc2c(cc1OC)CC(CC1CCN(CCCNc3c4c(nc5ccccc35)CCCC4)CC1)C2	CHEMBL3216209	1
COc1cc2c(cc1OC)CC(CC1CCN(CCNc3c4c(nc5cc(Cl)ccc35)CCCC4)CC1)C2	CHEMBL3216210	1
COc1cc2c(cc1OC)C(=O)C(CC1CCN(CCNc3c4c(nc5cc(Cl)ccc35)CCCC4)CC1)C2	CHEMBL3216422	1
Oc1c(CNCCCCCCCCCNc2c3c(nc4ccccc24)CCCC3)cc(Cl)c2cccnc12	CHEMBL3216469	1
CC1=CC2Cc3nc4cc(Cl)ccc4c(NCCCCCCCNc4c5c(nc6cc(Cl)ccc46)CCCC5)c3C(C1)C2	CHEMBL3216555	1
COc1cc2c(cc1OC)C(=O)C(CC1CCN(CCCNc3c4c(nc5cc(Cl)ccc35)CCCC4)CC1)C2	CHEMBL3216655	1
CC1=C[C@@H]2Cc3nc4cc(Cl)ccc4c(NCCCCCCCNc4c5c(nc6ccccc46)CCCC5)c3[C@H](C1)C2	CHEMBL3216777	1
COc1cc2c(cc1OC)C(=O)C(CC1CCN(CCCNc3c4c(nc5ccccc35)CCCC4)CC1)C2	CHEMBL3216886	1
COc1cc2c(cc1OC)CC(CC1CCN(CCCNc3c4c(nc5cc(Cl)ccc35)CCCC4)CC1)C2	CHEMBL3217103	1
CC1=C[C@H]2Cc3nc4cc(Cl)ccc4c(NCCCCCCCNc4c5c(nc6ccccc46)CCCC5)c3[C@@H](C1)C2	CHEMBL3217208	1
CC1=CC2Cc3nc4cc(Cl)ccc4c(NCCCCCNC(=O)c4cc(O)c5c(c4)C(=O)c4cccc(O)c4C5=O)c3C(C1)C2	CHEMBL3233826	1
CC1=CC2Cc3nc4cc(Cl)ccc4c(NCCCCCCNC(=O)c4cc(O)c5c(c4)C(=O)c4cccc(O)c4C5=O)c3C(C1)C2	CHEMBL3233827	1
CC1=CC2Cc3nc4cc(Cl)ccc4c(NCCCCCCCNC(=O)c4cc(O)c5c(c4)C(=O)c4cccc(O)c4C5=O)c3C(C1)C2	CHEMBL3233828	1
c1ccc2c(NCCSSCCNc3c4c(nc5ccccc35)CCCC4)c3c(nc2c1)CCCC3	CHEMBL3235503	1
O=C1Cc2cc3onc(CCC4CCN(Cc5ccccc5)CC4)c3cc2N1	CHEMBL328468	1
O=C1CCc2cc3c(CCC4CCN(Cc5ccccc5)CC4)noc3cc2N1	CHEMBL329231	1
O=C(C[n+]1ccccc1)N/N=C/c1ccc(/C=N/NC(=O)C[n+]2ccccc2)cc1	CHEMBL3313966	1
O=C(NCCCCCCCCNc1c2c(nc3cc(Cl)ccc13)CCCC2)c1ccc2nc(-c3ccc(Cl)cc3)c3c(c2c1)NCCC3	CHEMBL3322231	1
O=C(NCCCNc1c2c(nc3cc(Cl)ccc13)CCCC2)c1ccc2nc(-c3ccc(Cl)cc3)c3c(c2c1)NCCC3	CHEMBL3322232	1
COc1cc(CCC(=O)/C=C/CCCNc2c3c(nc4cc(Cl)ccc24)CC2CC(C)=CC3C2)ccc1O	CHEMBL3355579	1
O=C1C=C(NCCNc2c3c(nc4cc(Cl)ccc24)CCCC3)C(=O)c2ccccc21	CHEMBL3356532	1
O=C1C=C(NCCCNc2c3c(nc4cc(Cl)ccc24)CCCC3)C(=O)c2ccccc21	CHEMBL3356533	1
O=C1C(NCCNc2c3c(nc4cc(Cl)ccc24)CCCC3)=CC(=O)c2c(O)cccc21	CHEMBL3356536	1
O=C1C(NCCCNc2c3c(nc4cc(Cl)ccc24)CCCC3)=CC(=O)c2c(O)cccc21	CHEMBL3356537	1
O=C1C(Cl)=C(NCCNc2c3c(nc4cc(Cl)ccc24)CCCC3)C(=O)c2ccccc21	CHEMBL3356951	1
O=C1C(Cl)=C(NCCCNc2c3c(nc4cc(Cl)ccc24)CCCC3)C(=O)c2ccccc21	CHEMBL3356952	1
CN(CCCNc1c2c(nc3ccccc13)CCCC2)CCCNc1c2c(nc3ccccc13)CCCC2	CHEMBL338755	1
COc1cc2oc(-c3ccc(OCC(=O)NCCCCCNc4c5c(nc6cc(Cl)ccc46)CCCC5)cc3)cc(=O)c2c(OC)c1OC	CHEMBL3403874	1
CCc1ccccc1NC(=O)Oc1ccc2c(c1)[C@]1(C)CCN(C)[C@@H]1N2C	CHEMBL340391	1
CNC(=O)Oc1cccc(CN(C)CCCOc2ccc3ccc(=O)oc3c2)c1	CHEMBL340625	1
CCC1=CC2Cc3nc4cc(F)ccc4c(N)c3C(C1)C2	CHEMBL341658	1
COc1cc(N)c(Cl)cc1C(=O)CCC1CCN(Cc2ccccc2)CC1	CHEMBL3417001	1
Nc1c2c(nc3cc(Cl)ccc13)C1CCC2C1	CHEMBL352500	1
COc1cc2c(cc1OC)C(=O)C(CC1CCN(CC3CCCCC3)CC1)C2	CHEMBL355160	1
O=C1Cc2cc3c(CCC4CCN(Cc5ccccc5)CC4)noc3cc2N1	CHEMBL359570	1
CC1=CC2Cc3nc4cc(Cl)ccc4c(NCCCCCCCCCCCCNc4c5c(nc6ccccc46)CCCC5)c3C(C1)C2	CHEMBL3600551	1
CC1=CC2Cc3nc4cc(Cl)ccc4c(NCCCCCCCCCCCCNc4c5c(nc6cc(Cl)ccc46)CCCC5)c3C(C1)C2	CHEMBL3600552	1
CC1=CC2Cc3nc4ccccc4c(NCCCCCCCCCCNc4c5c(nc6ccccc46)CCCC5)c3C(C1)C2	CHEMBL3600553	1
CC1=CC2Cc3nc4ccccc4c(NCCCCCCCCCCNc4c5c(nc6cc(Cl)ccc46)CCCC5)c3C(C1)C2	CHEMBL3600555	1
CC1=CC2Cc3nc4ccccc4c(NCCCCCCCCCCCCNc4c5c(nc6cc(Cl)ccc46)CCCC5)c3C(C1)C2	CHEMBL3600556	1
CCC(C)n1cc(C(=O)C(F)(F)F)cn1	CHEMBL3623549	1
CCCC(C)n1cc(C(=O)C(F)(F)F)cn1	CHEMBL3623550	1
CCC(CC)n1cc(C(=O)C(F)(F)F)cn1	CHEMBL3623551	1
O=C(c1cnn(C2CCCC2)c1)C(F)(F)F	CHEMBL3623552	1
CC(C)(C)c1cccc(C(=O)C(F)F)c1	CHEMBL3623554	1
COc1cc2c(cc1OC)SC(C(=O)CCc1cc[n+](Cc3ccsc3)cc1)C2	CHEMBL362752	1
COc1cc(-c2cc3c(c(=O)o2)C[C@]2(O)[C@@]4(C)C(=O)C=CC(C)(C)[C@]4(O)CC[C@@]2(C)O3)cc(OC)c1O	CHEMBL3632858	1
CC(=O)NCCc1c[nH]c2ccc(OC(=O)NCCCCCCCNc3c4c(nc5cc(Cl)ccc35)CCCC4)cc12	CHEMBL3642043	1
CC(=O)NCCc1c[nH]c2ccc(OC(=O)NCCCCCCCCNc3c4c(nc5ccccc35)CCCC4)cc12	CHEMBL3642049	1
CC(=O)NCCc1c[nH]c2ccc(OC(=O)NCCCCCCCCCCNc3c4c(nc5ccccc35)CCCC4)cc12	CHEMBL3642052	1
CC(=O)NCCc1c[nH]c2ccc(OC(=O)NCCCCCCCCCCCCNc3c4c(nc5ccccc35)CCCC4)cc12	CHEMBL3642053	1
CC(=O)NCCc1c[nH]c2ccc(OC(=O)NCCCCCCCCCCNc3c4c(nc5ccc(Cl)cc35)CCCC4)cc12	CHEMBL3642054	1
CC(=O)NCCc1c[nH]c2ccc(OC(=O)NCCCCCCCCCCNc3c4c(nc5cc(Cl)ccc35)CCCC4)cc12	CHEMBL3642055	1
CC(=O)NCCc1c[nH]c2ccc(OC(=O)NCCCCCCCCCCCCNc3c4c(nc5ccc(Cl)cc35)CCCC4)cc12	CHEMBL3642057	1
O=C(CCCCCNc1c2c(nc3ccccc13)CCCC2)NCCc1c[nH]c2ccc(O)cc12	CHEMBL370807	1
COc1ccc2[nH]cc(CCNC(=O)CCCCCCNc3c4c(nc5cc(Cl)cc(Cl)c35)CCCC4)c2c1	CHEMBL372202	1
COc1cc(C(=O)NCCCCCCCCC(=O)NNc2c3c(cc4ccccc24)CCCC3)cc(OC)c1OC	CHEMBL374981	1
COc1cccc2cc(CNCCCCCCCNc3c4c(nc5ccccc35)CCCCC4)oc12	CHEMBL3753405	1
O=C(CCCCCCNc1c2c(nc3cc(Cl)ccc13)CCCC2)NCCc1c[nH]c2ccccc12	CHEMBL381499	1
COc1ccc2[nH]cc(CCNC(=O)CCCCCCNc3c4c(nc5ccccc35)CCCC4)c2c1	CHEMBL382260	1
CCCCCCCNC(=O)Oc1cccc(CN(C)CCCCCOc2ccc3c(c2)Oc2ncccc2C3)c1	CHEMBL3827044	1
CCN(CCCCCC(=O)N1CCC(CCC2CCN(C(=O)CCCCCN(CC)Cc3ccccc3OC)CC2)CC1)Cc1ccccc1OC	CHEMBL387394	1
COc1ccc2c(CCC3CCN(Cc4ccccc4)CC3)noc2c1	CHEMBL418955	1
O=C(NCCNc1c2c(nc3ccccc13)CCCC2)C(=O)NCCNc1c2c(nc3ccccc13)CCCC2	CHEMBL440983	1
CCN(CCCCCCn1c(=O)c(=O)n(CCCCCCN(CC)Cc2ccccc2OC)c2ccccc21)Cc1ccccc1OC	CHEMBL452339	1
Clc1ccc2c(NCCCNCCCCCOc3cccc4[nH]c5ccccc5c34)c3c(nc2c1)CCCC3	CHEMBL473866	1
Clc1ccc2c(NCCCNCCCCCCOc3cccc4[nH]c5ccccc5c34)c3c(nc2c1)CCCC3	CHEMBL474268	1
Clc1ccc2c(NCCCNCCCOc3cccc4[nH]c5ccccc5c34)c3c(nc2c1)CCCC3	CHEMBL478666	1
Clc1ccc2c(NCCCNCCCCOc3cccc4[nH]c5ccccc5c34)c3c(nc2c1)CCCC3	CHEMBL478667	1
Nc1c2c(nc3cc(Cl)ccc13)CCCC2	CHEMBL486698	1
CCN(CCCCCC(=O)N1Cc2ccc3c4c(ccc(c24)C1)CN(C(=O)CCCCCN(CC)Cc1ccccc1OC)C3)Cc1ccccc1OC	CHEMBL507885	1
CCN(CCCCCCn1c(=O)c2cc3c(=O)n(CCCCCCN(CC)Cc4ccccc4OC)c(=O)c3cc2c1=O)Cc1ccccc1OC	CHEMBL507903	1
CC1=CC2Cc3nc4cc(Cl)ccc4c(NCCCCCCCCNc4c5c(nc6ccccc46)CCCC5)c3C(C1)C2	CHEMBL534932	1
CCC1=CC2Cc3nc4ccccc4c(NCCCCCCCCNc4c5c(nc6ccccc46)CCCC5)c3C(C1)C2	CHEMBL535812	1
CC1=CC2Cc3nc4cc(Cl)ccc4c(NCCCCCCCCNc4c5c(nc6cc(Cl)ccc46)CCCC5)c3C(C1)C2	CHEMBL539599	1
CC[N+](CC)(CC)CCOc1ccc(C(=O)NCCCCCC(=O)NNc2c3c(nc4cc(Cl)ccc24)CCCC3)cc1	CHEMBL540131	1
CC[N+](CC)(CC)CCOc1cc(OCC[N+](CC)(CC)CC)cc(C(=O)NCCCCCC(=O)NNc2c3c(nc4cc(Cl)ccc24)CCCC3)c1	CHEMBL540132	1
CC[N+](CC)(CC)CCOc1cc(OCC[N+](CC)(CC)CC)c(C(=O)NCCCCCC(=O)NNc2c3c(nc4cc(Cl)ccc24)CCCC3)cc1OCC[N+](CC)(CC)CC	CHEMBL555247	1
CCC1=CC2Cc3nc4cc(Cl)ccc4c(NCCO)c3C(C1)C2	CHEMBL573095	1
CC1=CC2Cc3nc4cc(Cl)ccc4c(NCC[N-][N+]#N)c3C(C1)C2	CHEMBL574973	1
CCC1=CC2Cc3nc4cc(Cl)ccc4c(NCCn4cc(CCCCCCN5CCc6cc(OC)c(OC)cc6C5c5cccc([N+](=O)[O-])c5)nn4)c3C(C1)C2	CHEMBL575674	1
COc1cc2c(cc1OC)C(c1cccc([N+](=O)[O-])c1)N(CCCCCCc1cn(CCNc3c4c(nc5cc(Cl)ccc35)CC3C=C(C)CC4C3)nn1)CC2	CHEMBL575802	1
CC1=CC2Cc3nc4cc(Cl)ccc4c(NCCO)c3C(C1)C2	CHEMBL583920	1
CC(C)(C)c1cc[n+](CCCCCCCCCCCC[n+]2ccc(C(C)(C)C)cc2)cc1	CHEMBL594629	1
Cc1cc2onc(CCC3CCN(Cc4ccccc4)CC3)c2cc1C	CHEMBL91291	1
CC(=O)Nc1ccc2c(CCC3CCN(Cc4ccccc4)CC3)noc2c1	CHEMBL92736	1
COc1ccc2onc(CCC3CCN(Cc4ccccc4)CC3)c2c1	CHEMBL94186	1
O=C1Cc2c(ccc3c(CCC4CCN(Cc5ccccc5)CC4)noc23)N1	CHEMBL95020	1
CCC(C)CSC(=O)OCC[N+](C)(C)C	CHEMBL101482	0
CCCCCCSC(=O)OCC[N+](C)(C)C	CHEMBL102077	0
CCCCSC(=O)OCC[N+](C)(C)C	CHEMBL102078	0
CCCCCCCSC(=O)OCC[N+](C)(C)C	CHEMBL102226	0
CCc1ccccc1SC(=O)OCC[N+](C)(C)C	CHEMBL103153	0
CCC(C)(C)SC(=O)OCC[N+](C)(C)C	CHEMBL103890	0
CCc1ccc(SC(=O)OCC[N+](C)(C)C)cc1	CHEMBL103959	0
c1ccc2c[n+](CCCCCCCCCCCC[n+]3ccc4ccccc4c3)ccc2c1	CHEMBL105537	0
c1cc[n+](CCCCCCCCC[n+]2ccccc2)cc1	CHEMBL105742	0
C(=C\C[n+]1ccccc1)\C[n+]1ccccc1	CHEMBL1076550	0
CCCn1cnc2c1c(=O)n(CCCCC(C)=O)c(=O)n2C	CHEMBL1079905	0
c1cc[n+](Cc2ccccc2C[n+]2ccccc2)cc1	CHEMBL1081124	0
c1cc[n+](Cc2cccc(C[n+]3ccccc3)c2)cc1	CHEMBL1081125	0
c1cc[n+](Cc2ccc(C[n+]3ccccc3)cc2)cc1	CHEMBL1081126	0
c1cc[n+](COC[n+]2ccccc2)cc1	CHEMBL1081448	0
c1cc[n+](CCOCC[n+]2ccccc2)cc1	CHEMBL1081449	0
C(=C/C[n+]1ccccc1)\C[n+]1ccccc1	CHEMBL1081613	0
CC1CCN(c2nccc(NCc3ccccc3)n2)CC1	CHEMBL1082977	0
c1ccc(CCNc2ccnc(N3CCCC3)n2)cc1	CHEMBL1082978	0
c1ccc(CCNc2ccnc(N3CCSCC3)n2)cc1	CHEMBL1082979	0
CN1CCN(c2nccc(NCCc3ccccc3)n2)CC1	CHEMBL1082980	0
CC1CCN(c2nccc(NCCc3ccccc3)n2)CC1	CHEMBL1082981	0
COC(=O)c1cc2c(N)c3c(nc2nc1C)CCC3	CHEMBL1083972	0
CCOC(=O)c1cc2c(N)c3c(nc2nc1C)CCCCC3	CHEMBL1083973	0
c1ccc2c(CNc3ccnc(N4CCCC4)n3)cccc2c1	CHEMBL1084210	0
c1ccc2c(CNc3ccnc(N4CCOCC4)n3)cccc2c1	CHEMBL1084211	0
c1ccc2c(CNc3ccnc(N4CCSCC4)n3)cccc2c1	CHEMBL1084212	0
CN1CCN(c2nccc(NCc3cccc4ccccc34)n2)CC1	CHEMBL1084213	0
COC(=O)c1cc2c(N)c3c(nc2nc1C)CCCCC3	CHEMBL1084250	0
COC(=O)c1cc2c(N)c3c(nc2nc1C)CCCCCC3	CHEMBL1084517	0
CCOC(=O)c1cc2c(N)c3c(nc2nc1C)CCC3	CHEMBL1084518	0
CCOC(=O)c1cc2c(N)c3c(nc2nc1C)CCCCCC3	CHEMBL1084519	0
CN1CCN(c2nccc(NCc3ccccc3)n2)CC1	CHEMBL1084808	0
c1ccc(CCNc2ccnc(N3CCOCC3)n2)cc1	CHEMBL1085505	0
c1ccc(CNc2ccnc(N3CCCC3)n2)cc1	CHEMBL1085780	0
c1ccc(CNc2ccnc(N3CCOCC3)n2)cc1	CHEMBL1085781	0
c1ccc(CNc2ccnc(N3CCSCC3)n2)cc1	CHEMBL1086014	0
COC(=O)c1cc2c(N)c3c(nc2nc1C)CCCC3	CHEMBL1086184	0
c1cc[n+](CCCC[n+]2ccccc2)cc1	CHEMBL1088018	0
c1cc[n+](CCCCC[n+]2ccccc2)cc1	CHEMBL1088019	0
c1cc[n+](CCCCCCC[n+]2ccccc2)cc1	CHEMBL1088155	0
Cc1c(C)c2ccc(OCc3cccc(Cl)c3)cc2oc1=O	CHEMBL109018	0
C[N+](C)(C)CCCCCCCCCC[N+](C)(C)C	CHEMBL1134	0
C=C1c2c(Cl)cccc2N=C2CCCCCN12	CHEMBL1161716	0
C=C1c2ccccc2N=C2CCCCCN12	CHEMBL1161719	0
C=C1c2cccc(Cl)c2N=C2CCCCCN12	CHEMBL1161720	0
CN(C)c1cccc(OC(=O)Nc2ccccc2)c1	CHEMBL1171854	0
C[N+](C)(C)c1cccc(OC(=O)Nc2ccccc2)c1	CHEMBL1172830	0
COc1cc(C(C#N)N2CCN(C)CC2)cc(OC)c1OC	CHEMBL1190535	0
N#CC(c1ccc2c(c1)OCO2)N1CCOCC1	CHEMBL1191355	0
COc1cc(C(C#N)N2CCOCC2)cc(OC)c1OC	CHEMBL1192998	0
CN1CCN(C(C#N)c2ccc3c(c2)OCO3)CC1	CHEMBL1194868	0
CNC(=O)Oc1ccc2c(c1)[C@]1(C)CCN(C)[C@@H]1N2C=O	CHEMBL1243170	0
CNC(=O)Oc1ccc2c(c1)[C@]1(C)CCN(Cc3ccccc3)[C@@H]1N2Cc1ccccc1	CHEMBL1243234	0
CC(C)c1ccc(NC(=O)Oc2ccc3c(c2)C2(C)COC(O3)O2)cc1	CHEMBL1243268	0
CNC(=O)Oc1ccc2c(c1)[C@@]1(C)CCN(C)[C@@H]1N2C	CHEMBL1243269	0
C[C@@]12CCN(Cc3ccccc3)[C@@H]1N(Cc1ccccc1)c1ccc(OC(=O)Nc3ccccc3)cc12	CHEMBL1243297	0
O=C(Nc1ccccc1Cl)Oc1ccc2c(c1)CCCN2Cc1ccccc1	CHEMBL1243388	0
O=C(CCCCCCCCc1ccccc1)c1c(O)cccc1O	CHEMBL1254269	0
CCCCCCCCCCCCCCNc1c2c(nc3ccc(OC)cc13)CCCC2	CHEMBL1257412	0
CCCCCCCCCCCCCNc1c2c(nc3ccc(OC)cc13)CCCC2	CHEMBL1257413	0
CCCCCCCCCCCCNc1c2c(nc3ccc(OC)cc13)CCCC2	CHEMBL1257525	0
CCCCCCCCCNc1c2c(nc3ccc(OC)cc13)CCCC2	CHEMBL1257644	0
CCCCCNc1c2c(nc3ccc(OC)cc13)CCCC2	CHEMBL1257886	0
CCCCNc1c2c(nc3ccc(OC)cc13)CCCC2	CHEMBL1257887	0
CCCNc1c2c(nc3ccc(OC)cc13)CCCC2	CHEMBL1257996	0
CCNc1c2c(nc3ccc(OC)cc13)CCCC2	CHEMBL1257997	0
O=P(O)(NN1CCCCC1)Oc1ccccc1	CHEMBL1275924	0
O=C(NP(=O)(NN1CCOCC1)NN1CCOCC1)c1ccccc1	CHEMBL1276534	0
O=C(NP(=O)(NN1CCCCC1)NN1CCCCC1)c1ccccc1	CHEMBL1276567	0
O=P(NN1CCOCC1)(NN1CCOCC1)Oc1ccccc1	CHEMBL1276594	0
COc1ccc(C2CN(C)C3(C(=O)Nc4ccc([N+](=O)[O-])cc43)C23Cc2cc(OC)c(OC)cc2C3=O)cc1OC	CHEMBL1288821	0
COc1ccc(C2C(c3ccccc3)NC3(C(=O)Nc4ccccc43)C23Cc2cc(OC)c(OC)cc2C3=O)cc1OC	CHEMBL1288822	0
COc1cc2c(cc1OC)C(=O)C1(C2)C(c2ccc(F)cc2)C(c2ccccc2)NC12C(=O)Nc1ccc(Cl)cc12	CHEMBL1288823	0
COc1ccc(C2C(c3ccccc3)NC3(C(=O)Nc4ccc(Cl)cc43)C23Cc2cc(OC)c(OC)cc2C3=O)cc1OC	CHEMBL1288824	0
COc1cc2c(cc1OC)C(=O)C1(C2)C(c2ccccc2Cl)C(c2ccccc2)NC12C(=O)Nc1ccc(Cl)cc12	CHEMBL1288825	0
COc1cc2c(cc1OC)C(=O)C1(C2)C(c2ccc(F)cc2)C(c2ccccc2)NC12C(=O)Nc1ccc([N+](=O)[O-])cc12	CHEMBL1288826	0
COc1ccc(C2C(c3ccccc3)NC3(C(=O)Nc4ccc([N+](=O)[O-])cc43)C23Cc2cc(OC)c(OC)cc2C3=O)cc1OC	CHEMBL1288827	0
COc1cc2c(cc1OC)C(=O)C1(C2)C(c2ccccc2)C(c2ccccc2)NC12C(=O)Nc1ccc([N+](=O)[O-])cc12	CHEMBL1288828	0
COc1cc2c(cc1OC)C(=O)C1(C2)C(c2ccccc2Cl)C(c2ccccc2)NC12C(=O)Nc1ccc([N+](=O)[O-])cc12	CHEMBL1288829	0
COc1cc2c(cc1OC)C(=O)C1(C2)C(c2ccc(F)cc2)CN(C)C12C(=O)Nc1ccccc12	CHEMBL1289045	0
COc1ccc(C2CN(C)C3(C(=O)Nc4ccccc43)C23Cc2cc(OC)c(OC)cc2C3=O)cc1OC	CHEMBL1289159	0
COc1cc2c(cc1OC)C(=O)C1(C2)C(c2ccccc2)CN(C)C12C(=O)Nc1ccccc12	CHEMBL1289160	0
COc1cc2c(cc1OC)C(=O)C1(C2)C(c2ccccc2Cl)CN(C)C12C(=O)Nc1ccccc12	CHEMBL1289273	0
COc1cc2c(cc1OC)C(=O)C1(C2)C(c2ccc(F)cc2)CN(C)C12C(=O)Nc1ccc(Cl)cc12	CHEMBL1289274	0
COc1ccc(C2CN(C)C3(C(=O)Nc4ccc(Cl)cc43)C23Cc2cc(OC)c(OC)cc2C3=O)cc1OC	CHEMBL1289391	0
COc1cc2c(cc1OC)C(=O)C1(C2)C(c2ccccc2)CN(C)C12C(=O)Nc1ccc(Cl)cc12	CHEMBL1289392	0
COc1cc2c(cc1OC)C(=O)C1(C2)C(c2ccccc2Cl)CN(C)C12C(=O)Nc1ccc(Cl)cc12	CHEMBL1289506	0
COc1cc2c(cc1OC)C(=O)C1(C2)C(c2ccc(F)cc2)CN(C)C12C(=O)Nc1ccc([N+](=O)[O-])cc12	CHEMBL1289507	0
COc1cc2c(cc1OC)C(=O)C1(C2)C(c2ccccc2)CN(C)C12C(=O)Nc1ccc([N+](=O)[O-])cc12	CHEMBL1289615	0
COc1cc2c(cc1OC)C(=O)C1(C2)C(c2ccccc2Cl)CN(C)C12C(=O)Nc1ccc([N+](=O)[O-])cc12	CHEMBL1289719	0
COc1cc2c(cc1OC)C(=O)C1(C2)C(c2ccc(F)cc2)C(c2ccccc2)NC12C(=O)Nc1ccccc12	CHEMBL1289825	0
COc1cc2c(cc1OC)C(=O)C1(C2)C(c2ccccc2)C(c2ccccc2)NC12C(=O)Nc1ccccc12	CHEMBL1289942	0
COc1cc2c(cc1OC)C(=O)C1(C2)C(c2ccccc2Cl)C(c2ccccc2)NC12C(=O)Nc1ccccc12	CHEMBL1290043	0
COc1cc2c(cc1OC)C(=O)C1(C2)C(c2ccccc2)C(c2ccccc2)NC12C(=O)Nc1ccc(Cl)cc12	CHEMBL1290152	0
Nc1c2c(nc3cnccc13)OCCC2	CHEMBL130373	0
CSc1nc(-c2ccc(OC(F)(F)F)cc2)nn1C(=O)N(C)C	CHEMBL130478	0
NCCCCCCNCCSSCCNCCCCCCN	CHEMBL132133	0
COc1ccccc1CNCCCCCC(=O)N(C)CCCCCCCCN(C)C(=O)CCCCCNCc1ccccc1OC	CHEMBL132377	0
Cc1ccc(C(=O)Nc2cc3ccccc3oc2=O)cc1	CHEMBL1325943	0
COc1cccc(C(=O)N2c3ccccc3Sc3ccccc32)c1	CHEMBL1327885	0
Nc1c2c(nc3ncccc13)OCCC2	CHEMBL133441	0
Nc1c2c(nc3ccc(Cl)cc13)OCCC2	CHEMBL134240	0
COc1ccccc1CNCCCCCCNCCCCCNCCCCCCNCc1ccccc1OC	CHEMBL134382	0
COc1ccc(C(C#N)N2CCCCC2)cc1OC	CHEMBL1344483	0
COc1ccccc1CNCCCCCC(=O)NCCCCCCCCNC(=O)CCCCCNCc1ccccc1OC	CHEMBL134488	0
N#CC(c1ccc(O)cc1)N1CCCCC1	CHEMBL1377579	0
Clc1ccc2c(c1)Nc1ccccc1S2	CHEMBL1411769	0
C[n+]1ccccc1C=NO	CHEMBL1420	0
O=c1[nH]c(=O)c2[nH]cnc2[nH]1	CHEMBL1424	0
CCN(C)C(=O)Oc1cccc(C(C)N(C)C)c1	CHEMBL151763	0
C=CC(=O)N1C/C(=C\c2ccc(Cl)cc2)C(=O)/C(=C/c2ccc(Cl)cc2)C1	CHEMBL152675	0
Cc1c(C)c2c(c(C)c1O)CCC(C)(C(=O)O)O2	CHEMBL153	0
COc1ccc2c3c1O[C@H]1C[C@@H](O)C=C[C@@]31CCN(C)C2	CHEMBL1555	0
COc1cc(C(C#N)N2CCCCC2)ccc1O	CHEMBL1556015	0
C=CC(=O)N1C/C(=C\c2ccccc2)C(=O)/C(=C/c2ccccc2)C1	CHEMBL156016	0
COc1cc(C(C#N)N2CCOCC2)ccc1O	CHEMBL1611608	0
CC(C)(C)c1cc[n+](C[n+]2ccc(C(C)(C)C)cc2)cc1	CHEMBL1642970	0
CC(C)(C)c1cc[n+](CC[n+]2ccc(C(C)(C)C)cc2)cc1	CHEMBL1642971	0
CC(C)(C)c1cc[n+](CCC[n+]2ccc(C(C)(C)C)cc2)cc1	CHEMBL1642972	0
CC(C)(C)c1cc[n+](CCCC[n+]2ccc(C(C)(C)C)cc2)cc1	CHEMBL1642973	0
CC(C)(C)c1cc[n+](CCCCC[n+]2ccc(C(C)(C)C)cc2)cc1	CHEMBL1642974	0
CC(C)(C)c1cc[n+](COC[n+]2ccc(C(C)(C)C)cc2)cc1	CHEMBL1642981	0
CC(C)(C)c1cc[n+](CCOCC[n+]2ccc(C(C)(C)C)cc2)cc1	CHEMBL1642982	0
CC(C)(C)c1cc[n+](C/C=C/C[n+]2ccc(C(C)(C)C)cc2)cc1	CHEMBL1642983	0
CC(C)(C)c1cc[n+](C/C=C\C[n+]2ccc(C(C)(C)C)cc2)cc1	CHEMBL1642984	0
CC(C)(C)c1cc[n+](Cc2ccccc2C[n+]2ccc(C(C)(C)C)cc2)cc1	CHEMBL1642985	0
O/N=C/c1cc[n+](CCC[n+]2ccc(-c3ccccc3)cc2)cc1	CHEMBL1644323	0
CC(=O)c1cc[n+](CCC[n+]2ccc(/C=N/O)cc2)cc1	CHEMBL1644325	0
N=C(NO)c1cc[n+](CCC[n+]2ccc(/C=N/O)cc2)cc1	CHEMBL1644328	0
O=c1ccc2cc3ccoc3cc2o1	CHEMBL164660	0
CC(C)=CC(=O)C[C@H](C)c1ccc(C)cc1	CHEMBL1668333	0
Cc1ccc([C@@H](C)CC(=O)CC(C)C)cc1	CHEMBL1668334	0
c1ccc2c[n+](C[n+]3ccc4ccccc4c3)ccc2c1	CHEMBL1669480	0
c1ccc2c[n+](CCC[n+]3ccc4ccccc4c3)ccc2c1	CHEMBL1669481	0
c1ccc2c[n+](CCCC[n+]3ccc4ccccc4c3)ccc2c1	CHEMBL1669482	0
c1ccc2c[n+](CCCCC[n+]3ccc4ccccc4c3)ccc2c1	CHEMBL1669483	0
c1ccc2c[n+](COC[n+]3ccc4ccccc4c3)ccc2c1	CHEMBL1669487	0
c1ccc2c[n+](CCOCC[n+]3ccc4ccccc4c3)ccc2c1	CHEMBL1669488	0
C(=C/C[n+]1ccc2ccccc2c1)\C[n+]1ccc2ccccc2c1	CHEMBL1669489	0
C(=C\C[n+]1ccc2ccccc2c1)\C[n+]1ccc2ccccc2c1	CHEMBL1669490	0
c1ccc(C[n+]2ccc3ccccc3c2)c(C[n+]2ccc3ccccc3c2)c1	CHEMBL1669491	0
c1cc(C[n+]2ccc3ccccc3c2)cc(C[n+]2ccc3ccccc3c2)c1	CHEMBL1669492	0
c1ccc2c[n+](Cc3ccc(C[n+]4ccc5ccccc5c4)cc3)ccc2c1	CHEMBL1669493	0
Nc1c2c(nc3ccc(Cl)cc13)C1CCC2C1	CHEMBL172118	0
c1ccc2c(c1)ccc[n+]2CCC[n+]1cccc2ccccc21	CHEMBL1761991	0
c1ccc2c(c1)ccc[n+]2CCCC[n+]1cccc2ccccc21	CHEMBL1761992	0
c1ccc2c(c1)ccc[n+]2CCCCC[n+]1cccc2ccccc21	CHEMBL1761993	0
c1ccc2c(c1)ccc[n+]2COC[n+]1cccc2ccccc21	CHEMBL1761996	0
c1ccc2c(c1)ccc[n+]2CCOCC[n+]1cccc2ccccc21	CHEMBL1761997	0
C(=C/C[n+]1cccc2ccccc21)\C[n+]1cccc2ccccc21	CHEMBL1761998	0
C(=C\C[n+]1cccc2ccccc21)\C[n+]1cccc2ccccc21	CHEMBL1761999	0
c1ccc(C[n+]2cccc3ccccc32)c(C[n+]2cccc3ccccc32)c1	CHEMBL1762000	0
c1cc(C[n+]2cccc3ccccc32)cc(C[n+]2cccc3ccccc32)c1	CHEMBL1762001	0
CC(=O)N1CCN(c2nccc(NCc3ccccc3)n2)CC1	CHEMBL1766016	0
CC(C)(C)OC(=O)N1CCN(c2nccc(NCc3ccccc3)n2)CC1	CHEMBL1766017	0
c1ccc(CNc2ccnc(N3CCN(C4CCCCC4)CC3)n2)cc1	CHEMBL1766018	0
CC(C)N1CCN(c2nccc(NCc3ccccc3)n2)CC1	CHEMBL1766019	0
CC(C)C1CCN(c2nccc(NCc3ccccc3)n2)CC1	CHEMBL1766020	0
CCCN1CCN(c2nccc(NCc3ccccc3)n2)CC1	CHEMBL1766139	0
OCCN1CCN(c2nccc(NCc3ccccc3)n2)CC1	CHEMBL1766140	0
COCCN1CCN(c2nccc(NCc3ccccc3)n2)CC1	CHEMBL1766141	0
Clc1ccc(CN2CCN(c3nccc(NCc4ccccc4)n3)CC2)cc1	CHEMBL1766142	0
Brc1ccc(CN2CCN(c3nccc(NCc4ccccc4)n3)CC2)cc1	CHEMBL1766143	0
Fc1ccc(CN2CCN(c3nccc(NCc4ccccc4)n3)CC2)cc1	CHEMBL1766144	0
FC(F)(F)c1ccc(CN2CCN(c3nccc(NCc4ccccc4)n3)CC2)cc1	CHEMBL1766145	0
c1ccc(CNc2ccnc(NC3CCN(Cc4ccccc4)CC3)n2)cc1	CHEMBL1766146	0
O=S1CCN(c2nccc(NCc3ccccc3)n2)CC1	CHEMBL1766147	0
O=S1(=O)CCN(c2nccc(NCc3ccccc3)n2)CC1	CHEMBL1766148	0
c1ccc(CNc2ccnc(N3CCNCC3)n2)cc1	CHEMBL1766149	0
CC(=O)N1CCN(c2nccc(NCCc3ccccc3)n2)CC1	CHEMBL1766150	0
CC1CCN(c2nccc(NCc3cccc4ccccc34)n2)CC1	CHEMBL1766151	0
O=C1C=C(NCCCNCc2cc3ccccc3o2)C(=O)C=C1NCCCNCc1cc2ccccc2o1	CHEMBL1770550	0
O=C1C=C(NCCCCCCNCc2nc3ccccc3s2)C(=O)C=C1NCCCCCCNCc1nc2ccccc2s1	CHEMBL1770553	0
O=C1C=C(NCCCNCc2ccc(-c3nc4ccccc4s3)cc2)C(=O)C=C1NCCCNCc1ccc(-c2nc3ccccc3s2)cc1	CHEMBL1770554	0
CC(C)c1ccc(NC(=O)Oc2ccc3c(c2)[C@]2(C)CCOC2N3C)cc1	CHEMBL178132	0
CCN(CC)C(C)C(=O)N1c2ccccc2Sc2ccccc21	CHEMBL1782730	0
C[C@@H]([C@H]1[C@H](O)C[C@@]2(C)[C@@H]3CC[C@H]4[C@]5(C)COC(C(F)(C(F)(F)F)C(F)(F)F)=N[C@H]5CC[C@@]45C[C@@]35C(=O)C[C@]12C)N(C)C	CHEMBL1783531	0
CC(C)c1ccc(NC(=O)Oc2ccc3c(c2)C2(C)COC(C2)O3)cc1	CHEMBL178792	0
CC(C)c1ccc(NC(=O)Oc2ccc3c(c2)C2(C)CCOC2O3)cc1	CHEMBL179320	0
O=C(c1ccccc1)N1c2ccccc2Sc2ccc(Cl)cc21	CHEMBL1801815	0
COc1ccc(C(=O)N2c3ccccc3Sc3ccc(Cl)cc32)cc1	CHEMBL1801816	0
CC(C)N1CCN(c2nccc(NCc3cccc4ccccc34)n2)CC1	CHEMBL1834060	0
CC(C)C1CCN(c2nccc(NCc3cccc4ccccc34)n2)CC1	CHEMBL1834061	0
CCCN1CCN(c2nccc(NCc3cccc4ccccc34)n2)CC1	CHEMBL1834062	0
c1ccc2c(CNc3ccnc(N4CCN(C5CCCCC5)CC4)n3)cccc2c1	CHEMBL1834063	0
CC(=O)N1CCN(c2nccc(NCc3cccc4ccccc34)n2)CC1	CHEMBL1834064	0
CC(C)(C)OC(=O)N1CCN(c2nccc(NCc3cccc4ccccc34)n2)CC1	CHEMBL1834065	0
c1ccc2c(CNc3ccnc(N4CCNCC4)n3)cccc2c1	CHEMBL1834066	0
OCCN1CCN(c2nccc(NCc3cccc4ccccc34)n2)CC1	CHEMBL1834067	0
COCCN1CCN(c2nccc(NCc3cccc4ccccc34)n2)CC1	CHEMBL1834068	0
CN1CCN(c2nccc(NC(c3ccccc3)c3ccccc3)n2)CC1	CHEMBL1834069	0
CC1CCN(c2nccc(NC(c3ccccc3)c3ccccc3)n2)CC1	CHEMBL1834070	0
CC(C)N1CCN(c2nccc(NC(c3ccccc3)c3ccccc3)n2)CC1	CHEMBL1834071	0
CC(C)C1CCN(c2nccc(NC(c3ccccc3)c3ccccc3)n2)CC1	CHEMBL1834072	0
CCCN1CCN(c2nccc(NC(c3ccccc3)c3ccccc3)n2)CC1	CHEMBL1834073	0
c1ccc(C(Nc2ccnc(N3CCN(C4CCCCC4)CC3)n2)c2ccccc2)cc1	CHEMBL1834074	0
CC(=O)N1CCN(c2nccc(NC(c3ccccc3)c3ccccc3)n2)CC1	CHEMBL1834075	0
c1ccc(C(Nc2ccnc(N3CCNCC3)n2)c2ccccc2)cc1	CHEMBL1834077	0
OCCN1CCN(c2nccc(NC(c3ccccc3)c3ccccc3)n2)CC1	CHEMBL1834078	0
COCCN1CCN(c2nccc(NC(c3ccccc3)c3ccccc3)n2)CC1	CHEMBL1834079	0
CCCCC/C=C\C/C=C\CCCCCCCC(=O)OCCCc1cc(OC)c2oc(-c3ccc4c(c3)OCO4)cc2c1	CHEMBL1834806	0
CCCCC/C=C\C/C=C\CCCCCCCC(=O)OCCCc1ccc2oc(-c3ccc4c(c3)OCO4)cc2c1	CHEMBL1834807	0
CCCCCCCC/C=C\CCCCCCCC(=O)OCCCc1cc(OC)c2oc(-c3ccc4c(c3)OCO4)cc2c1	CHEMBL1834808	0
CCCCCCCC/C=C\CCCCCCCC(=O)OCCCc1ccc2oc(-c3ccc4c(c3)OCO4)cc2c1	CHEMBL1834809	0
CC[C@H](C)C(=O)OCCCc1cc(OC)c2oc(-c3ccc4c(c3)OCO4)cc2c1	CHEMBL1834810	0
CC[C@H](C)C(=O)OCCCc1ccc2oc(-c3ccc4c(c3)OCO4)cc2c1	CHEMBL1834811	0
COc1cc(CCCOC(=O)Nc2ccccc2)cc2cc(-c3ccc4c(c3)OCO4)oc12	CHEMBL1834877	0
CCC[n+]1ccc(CCC(=O)C2Cc3cc(OC)c(OC)cc3S2)cc1	CHEMBL187330	0
COc1cc2c(cc1OC)SC(CC1CC[N+](C)(Cc3ccccc3)CC1)C2	CHEMBL187591	0
CNC(=O)Oc1cccc(CN(C)CCCOc2ccc3c(c2)O/C(=C\c2cccc4ccccc24)C3=O)c1	CHEMBL190060	0
COc1cc2nc(Cl)nc(NCCCNC(=O)CCCCC3CCSS3)c2cc1OC	CHEMBL1912061	0
COc1cccc(C(C)N(C)CCCNC(=O)CCCCC2CCSS2)c1	CHEMBL1912063	0
CC(c1cccc(OCCCNC(=O)CCCCC2CCSS2)c1)N(C)C	CHEMBL1912064	0
CNC(=O)Oc1cccc(CN(C)CCCCCCCOc2ccc3c(c2)O/C(=C\c2c4ccccc4cc4ccccc24)C3=O)c1	CHEMBL191314	0
CNC(=O)Oc1cccc(CN(C)CCCOc2ccc3c(c2)O/C(=C\c2ccc4ccccc4c2)C3=O)c1	CHEMBL191386	0
CNC(=O)Oc1cccc(CN(C)CCCOc2ccc3c(c2)O/C(=C\c2cc(OC)c(OC)c(OC)c2)C3=O)c1	CHEMBL191416	0
C=CC(CBr)Nc1c2c(nc3ccc(OC)cc13)CCCC2	CHEMBL1914495	0
Nc1c2c(nc3c1cc(-c1ccccc1)n3-c1ccccc1)CCCC2	CHEMBL1916768	0
COc1cc2cc(C3=CC[N+](C)(Cc4ccccc4)CC3)sc2cc1OC	CHEMBL191729	0
C=CCCCNc1c2c(nc3ccc(OC)cc13)CCCC2	CHEMBL1917825	0
COc1ccc2nc3c(c(N4CCCCCN(c5c6c(nc7ccc(OC)cc57)CCCC6)CCCCC4)c2c1)CCCC3	CHEMBL1917826	0
C#CCOP(C)(=O)OC(C(F)(F)F)C(F)(F)F	CHEMBL1922540	0
C#CCOP(C)(=O)OC(C(=O)OC)C(F)(F)F	CHEMBL1922541	0
COc1c(CC=C(C)C)c(O)cc2c1C[C@H](c1ccc(O)c(CC=C(C)C)c1O)CO2	CHEMBL1929043	0
COc1ccccc1CNCCCCCCNC1=CC(=O)c2ccccc2C1=O	CHEMBL1940616	0
NCCCCCCNC1=CC(=O)c2ccccc2C1=O	CHEMBL1940617	0
COc1ccccc1CN1CCC(N2CCC(NC3=CC(=O)c4ccccc4C3=O)CC2)CC1	CHEMBL1940618	0
COC1=CC(=O)C(N2CCC(C3CCN(Cc4ccccc4OC)CC3)CC2)=CC1=O	CHEMBL1940619	0
CCCC/N=C(/C=N/O)N(C)C	CHEMBL1952048	0
CCCCC/N=C(/C=N/O)N(C)C	CHEMBL1952049	0
CC(C)CC/N=C(/C=N/O)N(C)C	CHEMBL1952050	0
O/N=C/C1=NCCN1Cc1ccccc1	CHEMBL1952058	0
O/N=C/C1=NCCN1Cc1ccc(Cl)cc1Cl	CHEMBL1952059	0
O/N=C/C1=NCCN1Cc1cc(C(F)(F)F)cc(C(F)(F)F)c1	CHEMBL1952060	0
CCCCN1CCCN=C1/C=N/O	CHEMBL1952061	0
CCCCCN1CCCN=C1/C=N/O	CHEMBL1952062	0
O/N=C/C1=NCCCN1Cc1ccccc1	CHEMBL1952063	0
O/N=C/C1=NCCCN1Cc1ccc(Cl)cc1Cl	CHEMBL1952064	0
O/N=C/C1=NCCCN1Cc1cc(C(F)(F)F)cc(C(F)(F)F)c1	CHEMBL1952065	0
CCCCN1CC(C)(C)CN=C1/C=N/O	CHEMBL1952066	0
CCCCCN1CC(C)(C)CN=C1/C=N/O	CHEMBL1952067	0
CCN(CC)CCS/C(=N\O)c1nc(C)no1	CHEMBL19557	0
COc1ccc([C@H]2Oc3cc(O)c(C/C=C(\C)CCC=C(C)C)c(O)c3C(=O)[C@@H]2O)cc1O	CHEMBL2011402	0
COc1c(O)cc(C2Oc3cc(O)c(C/C=C(\C)CCC=C(C)C)c(O)c3C(=O)[C@@H]2O)cc1O	CHEMBL2011403	0
COc1ccc([C@@H]2CC(=O)c3c(cc(O)c(C/C=C(\C)CCC=C(C)C)c3O)O2)cc1O	CHEMBL2011404	0
COc1c(O)cc(C2CC(=O)c3c(cc(O)c(C/C=C(\C)CCC=C(C)C)c3O)O2)cc1O	CHEMBL2011405	0
COc1cc(C2CC(=O)c3c(cc(O)c(C/C=C(\C)CCC=C(C)C)c3O)O2)cc(OC)c1O	CHEMBL2011406	0
COc1ccc2c(ccc[n+]2C)c1	CHEMBL2018160	0
COc1ccc2c(ccc[n+]2Cc2ccccc2)c1	CHEMBL2018161	0
CCN(CC)CCS/C(=N\O)c1nc(-c2ccccc2)no1	CHEMBL20339	0
Clc1ccccc1CNc1ccnc(NC2CCN(Cc3ccccc3)CC2)n1	CHEMBL2047223	0
Clc1cccc(CNc2ccnc(NC3CCN(Cc4ccccc4)CC3)n2)c1	CHEMBL2047224	0
Clc1ccc(CNc2ccnc(NC3CCN(Cc4ccccc4)CC3)n2)cc1	CHEMBL2047225	0
Brc1ccc(CNc2ccnc(NC3CCN(Cc4ccccc4)CC3)n2)cc1	CHEMBL2047226	0
Fc1ccc(CNc2ccnc(NC3CCN(Cc4ccccc4)CC3)n2)cc1	CHEMBL2047227	0
Cc1ccc(CNc2ccnc(NC3CCN(Cc4ccccc4)CC3)n2)cc1	CHEMBL2047228	0
COc1ccc(CNc2ccnc(NC3CCN(Cc4ccccc4)CC3)n2)cc1	CHEMBL2047229	0
COc1ccc(CNc2ccnc(NC3CCN(Cc4ccccc4)CC3)n2)cc1OC	CHEMBL2047230	0
COc1cc(CNc2ccnc(NC3CCN(Cc4ccccc4)CC3)n2)cc(OC)c1OC	CHEMBL2047231	0
c1ccc(CN2CCC(Nc3nccc(NCc4ccc5c(c4)OCO5)n3)CC2)cc1	CHEMBL2047375	0
CC(C)c1ccc(NC(=O)Oc2ccc3c(c2)[C@]2(C)CO[C@@H](C2)O3)cc1	CHEMBL205321	0
CCNC(=O)Oc1ccc2c(c1)[C@]1(C)CO[C@@H](C1)O2	CHEMBL205967	0
CC(C)c1ccc(NC(=O)Oc2ccc3c(c2)[C@@]2(C)CCO[C@H]2O3)cc1	CHEMBL206237	0
CC(C)=CCC/C(C)=C/Cc1ccc(=O)c2nc3cccc(O)c3[nH]c1-2	CHEMBL2071424	0
CC(=O)Oc1cccc2nc3c(OC(C)=O)ccc(C/C=C(\C)CCC=C(C)C)c3nc12	CHEMBL2071425	0
O=c1cccc2[nH]c3c(O)cccc3nc1-2	CHEMBL2071426	0
COc1ccc(C(O)c2nccc3cc(OC)c(OC)cc23)cc1OC	CHEMBL207931	0
COc1cc2ccnc(C(O)c3ccccc3OC)c2cc1OC	CHEMBL208132	0
N#Cc1c(N)nc(NC2CCN(Cc3ccccc3)CC2)c(C#N)c1-c1ccccc1	CHEMBL2088687	0
N#Cc1cc(C#N)c(NC2CCN(Cc3ccccc3)CC2)nc1N	CHEMBL2088783	0
Cc1nc2ccccn2c(=O)c1CCN1CCN(C(c2ccc(F)cc2)c2ccc(F)cc2)CC1	CHEMBL209863	0
COc1cc(Br)c(CN2CCN(C(c3ccc(F)cc3)c3ccc(F)cc3)CC2)cc1OC	CHEMBL209924	0
CC1=C(CCN2CCN(C(c3ccc(F)cc3)c3ccc(F)cc3)CC2)C(=O)C2CCCCC2=N1	CHEMBL212111	0
Cc1cc2c(cc1CN1CCN(C(c3ccc(F)cc3)c3ccc(F)cc3)CC1)OCO2	CHEMBL212162	0
CN(CCCCCOc1ccc(-c2cc3ccccc3o2)cc1)Cc1ccccc1	CHEMBL2160213	0
CN(CCCCCCCOc1ccc(-c2oc3ccccc3c2C(=O)c2cccc3ccccc23)cc1)Cc1ccccc1	CHEMBL2160217	0
CN(CCCCCCCOc1ccc(-c2oc3ccccc3c2C(=O)c2c3ccccc3cc3ccccc23)cc1)Cc1ccccc1	CHEMBL2160220	0
CCN(CC)Cc1cccc(C(=O)c2c(-c3ccc(OCCCCCCCN(C)Cc4ccccc4)cc3)oc3ccccc23)c1	CHEMBL2160221	0
Cc1cccc(C(=O)c2c(-c3cccc(OCCCCCCCN(C)Cc4ccccc4)c3)oc3ccccc23)c1	CHEMBL2160228	0
COc1cc2c(cc1OC)-c1cc3ccc(OC)c(OC)c3c[n+]1CC2	CHEMBL2163795	0
CO[P@]1(=O)CC[C@@H]2COC(=O)C2=C(C)O1	CHEMBL2179375	0
COc1cc2c(cc1OC)C(c1ccccc1)N(CCCc1ccc(O)c(/C=N/O)n1)CC2	CHEMBL2181430	0
COc1cc2c(cc1OC)C(c1ccccc1)N(CCCCCc1ccc(O)c(/C=N/O)n1)CC2	CHEMBL2181432	0
COc1cc2c(cc1OC)C(c1ccccc1)N(CCCCCc1ccnc(/C=N/O)c1O)CC2	CHEMBL2181437	0
COc1cc2c(cc1OC)C(c1ccccc1)N(CCCCCCc1cc(C)nc(/C=N/O)c1O)CC2	CHEMBL2181438	0
Nc1c2c(nc3c1C(c1ccc(O)cc1)c1ccc4ccccc4c1O3)CCCC2	CHEMBL2206893	0
COc1ccccc1C1c2ccc3ccccc3c2Oc2nc3c(c(N)c21)CCCC3	CHEMBL2206894	0
COc1cc(C2c3ccc4ccccc4c3Oc3nc4c(c(N)c32)CCCC4)cc(OC)c1OC	CHEMBL2206897	0
Nc1c2c(nc3c1C(c1ccc([N+](=O)[O-])cc1)c1ccc4ccccc4c1O3)CCCC2	CHEMBL2206898	0
Nc1c2c(nc3c1C(c1c(Cl)cccc1Cl)c1ccc4ccccc4c1O3)CCCC2	CHEMBL2206899	0
Nc1c2c(nc3c1C(c1ccc(Cl)c(Cl)c1)c1ccc4ccccc4c1O3)CCCC2	CHEMBL2206900	0
C[n+]1ccc2c(c1)[nH]c1ccc(O)cc12	CHEMBL220905	0
CCN(CCCCCCNc1ccc(Cc2ccc(NCCCCCCN(CC)Cc3ccccc3OC)cc2)cc1)Cc1ccccc1OC	CHEMBL222037	0
CCN(CCCCCCNc1ccc(-c2ccc(NCCCCCCN(CC)Cc3ccccc3OC)cc2)cc1)Cc1ccccc1OC	CHEMBL222044	0
CC(C)=CCC/C(C)=C/Cc1c(O)cc2c(c1O)C(=O)C[C@@H](c1ccc(O)c(O)c1)O2	CHEMBL223256	0
CCOC(=O)C1=C(C)Oc2nc3c(c(N)c2[C@H]1c1cccc([N+](=O)[O-])c1)CCCC3	CHEMBL2234511	0
CCOC(=O)C1=C(C)Oc2nc3c(c(N)c2[C@H]1c1ccccc1)CCC3	CHEMBL2234512	0
CCOC(=O)C1=C(C)Oc2nc3c(c(N)c2[C@H]1c1cccnc1OC)CCCC3	CHEMBL2234513	0
CCOC(=O)C1=C(C)Oc2nc3c(c(N)c2[C@H]1c1cccnc1Br)CCCC3	CHEMBL2234514	0
CCOC(=O)C1=C(C)Oc2nc3c(c(N)c2[C@H]1c1cccnc1Cl)CCCC3	CHEMBL2234515	0
CC1(C)CC(=O)C2=C(C1)Oc1nc3c(c(N)c1[C@H]2c1ccccc1)CCCC3	CHEMBL2234516	0
CC1(C)CC(=O)C2=C(C1)Oc1nc3c(c(N)c1[C@H]2c1ccc(F)cc1)CCCC3	CHEMBL2234517	0
CC1(C)CC(=O)C2=C(C1)Oc1nc3c(c(N)c1[C@H]2c1ccccc1C(F)(F)F)CCCC3	CHEMBL2234518	0
CC1(C)CC(=O)C2=C(C1)Oc1nc3c(c(N)c1[C@H]2c1cccc([N+](=O)[O-])c1)CCCC3	CHEMBL2234519	0
CC1(C)CC(=O)C2=C(C1)Oc1nc3c(c(N)c1[C@H]2c1ccc([N+](=O)[O-])cc1)CCCC3	CHEMBL2234520	0
Cc1ccc([C@H]2C3=C(CC(C)(C)CC3=O)Oc3nc4c(c(N)c32)CCCC4)cc1	CHEMBL2234521	0
COc1ccccc1[C@H]1C2=C(CC(C)(C)CC2=O)Oc2nc3c(c(N)c21)CCCC3	CHEMBL2234522	0
COc1cccc([C@H]2C3=C(CC(C)(C)CC3=O)Oc3nc4c(c(N)c32)CCCC4)c1	CHEMBL2234523	0
COc1ccc([C@H]2C3=C(CC(C)(C)CC3=O)Oc3nc4c(c(N)c32)CCCC4)cc1	CHEMBL2234524	0
CCOC(=O)c1c(C)nc2nc3c(c(N)c2c1-c1ccc(C)cc1)CCCCC3	CHEMBL2234538	0
CCOC(=O)c1c(C)nc2nc3c(c(N)c2c1-c1ccccc1OC)CCCCC3	CHEMBL2234539	0
CCOC(=O)c1c(C)nc2nc3c(c(N)c2c1-c1ccc(Cl)cc1)CCCCC3	CHEMBL2234540	0
CCOC(=O)c1c(C)nc2nc3c(c(N)c2c1-c1cccc([N+](=O)[O-])c1)CCCCC3	CHEMBL2234541	0
CCOC(=O)c1c(C)nc2nc3c(c(N)c2c1-c1ccccc1)CCCCCC3	CHEMBL2234542	0
CCOC(=O)c1c(C)nc2nc3c(c(N)c2c1-c1ccc(OC)cc1)CCCCCC3	CHEMBL2234543	0
CCOC(=O)C1=C(C)Oc2nc3c(c(N)c2[C@H]1c1ccncc1)CCC3	CHEMBL2234544	0
CCOC(=O)C1=C(C)Oc2nc3c(c(N)c2[C@H]1c1cccs1)CCC3	CHEMBL2234545	0
CCOC(=O)C1=C(C)Oc2nc3c(c(N)c2[C@H]1c1ccncc1)CCCC3	CHEMBL2234547	0
CCOC(=O)C1=C(C)Oc2nc3c(c(N)c2[C@H]1c1cccnc1)CCCC3	CHEMBL2234829	0
CCOC(=O)C1=C(C)Oc2nc3c(c(N)c2[C@H]1c1cccs1)CCCC3	CHEMBL2234830	0
CCOC(=O)C1=C(C)Oc2nc3c(c(N)c2[C@H]1c1ccco1)CCCC3	CHEMBL2234831	0
CCOC(=O)C1=C(C)Oc2nc3c(c(N)c2[C@H]1c1ccncc1)CCCCC3	CHEMBL2234832	0
CCOC(=O)C1=C(C)Oc2nc3c(c(N)c2[C@H]1c1cccnc1)CCCCC3	CHEMBL2234833	0
CCOC(=O)C1=C(C)Oc2nc3c(c(N)c2[C@H]1c1cccs1)CCCCC3	CHEMBL2234834	0
CCOC(=O)C1=C(C)Oc2nc3c(c(N)c2[C@H]1c1cccc(OC)c1)CCC3	CHEMBL2234835	0
CCOC(=O)C1=C(C)Oc2nc3c(c(N)c2[C@H]1c1ccc(OC)c(OC)c1)CCC3	CHEMBL2234836	0
CCOC(=O)C1=C(C)Oc2nc3c(c(N)c2[C@H]1c1cccc(OC)c1)CCCC3	CHEMBL2234837	0
CCOC(=O)C1=C(C)Oc2nc3c(c(N)c2[C@H]1c1ccc(OC)c(OC)c1)CCCC3	CHEMBL2234838	0
CCOC(=O)C1=C(C)Oc2nc3c(c(N)c2[C@H]1c1cccc(OC)c1)CCCCC3	CHEMBL2234839	0
CCOC(=O)C1=C(C)Oc2nc3c(c(N)c2[C@H]1c1ccccc1OC)CCCCC3	CHEMBL2234840	0
CCOC(=O)C1=C(C)Oc2nc3c(c(N)c2[C@H]1c1ccc(OC)c(OC)c1)CCCCC3	CHEMBL2234841	0
CCOC(=O)C1=C(C)Oc2nc3c(c(N)c2[C@H]1c1ccccc1)CCCC3	CHEMBL2234842	0
CCOC(=O)C1=C(C)Oc2nc3c(c(N)c2[C@H]1c1ccc(C)cc1)CCCC3	CHEMBL2234843	0
CCOC(=O)C1=C(C)Oc2nc3c(c(N)c2[C@H]1c1ccc(Cl)cc1)CCCC3	CHEMBL2234844	0
CCOC(=O)C1=C(C)Oc2nc3c(c(N)c2[C@H]1c1ccc(C#N)cc1)CCCC3	CHEMBL2234845	0
CN(CCCCCCCOc1ccc2c(=O)c3ccccc3oc2c1)Cc1ccc(Cl)cc1	CHEMBL223652	0
Nc1cc(-c2ccccc2)nc2nc(-c3ccccc3)cc(C(F)(F)F)c12	CHEMBL2237991	0
Nc1cc(-c2cccc(F)c2)nc2nc(-c3ccccc3)cc(C(F)(F)F)c12	CHEMBL2237992	0
Nc1cc(-c2ccc(F)cc2)nc2nc(-c3ccccc3)cc(C(F)(F)F)c12	CHEMBL2237993	0
COc1ccc(-c2cc(N)c3c(C(F)(F)F)cc(-c4ccccc4)nc3n2)cc1	CHEMBL2237996	0
Nc1cc(-c2cccs2)nc2nc(-c3ccccc3)cc(C(F)(F)F)c12	CHEMBL2237997	0
CC(C)Cc1cc(N)c2c(C(F)(F)F)cc(-c3ccccc3)nc2n1	CHEMBL2237998	0
Nc1c2c(nc3nc(-c4ccccc4)cc(C(F)(F)F)c13)CCC2	CHEMBL2237999	0
Nc1c2c(nc3nc(-c4ccccc4)cc(C(F)(F)F)c13)CCCCC2	CHEMBL2238001	0
Nc1c2c(nc3nc(-c4ccccc4)cc(C(F)(F)F)c13)CCCCCC2	CHEMBL2238002	0
CC1Cc2nc3nc(-c4ccccc4)cc(C(F)(F)F)c3c(N)c2C1	CHEMBL2238003	0
CC1CCc2c(nc3nc(-c4ccccc4)cc(C(F)(F)F)c3c2N)C1	CHEMBL2238004	0
Nc1c2c(nc3nc(-c4ccccc4)cc(C(F)(F)F)c13)-c1ccccc1C2	CHEMBL2238006	0
Nc1c2c(nc3nc(-c4ccccc4)cc(C(F)(F)F)c13)-c1ccccc1CC2	CHEMBL2238007	0
CN(CCCCCCCCCCCOc1ccc2c(=O)c3ccccc3oc2c1)Cc1ccccc1	CHEMBL224347	0
CN(CCCCCCCOc1ccc2c(=O)c3ccccc3oc2c1)Cc1ccccc1	CHEMBL224433	0
CN(CCCCCCCCOc1ccc2c(=O)c3ccccc3oc2c1)Cc1ccccc1	CHEMBL224469	0
CCN(CCCCCCCOc1ccc2c(=O)c3ccccc3oc2c1)Cc1ccccc1OC	CHEMBL224553	0
CN(CCCCCCCCCCCCOc1ccc2c(=O)c3ccccc3oc2c1)Cc1ccccc1	CHEMBL224555	0
CN(CCCCCCCOc1ccc2c(=O)c3ccccc3oc2c1)Cc1ccccc1[N+](=O)[O-]	CHEMBL224811	0
COc1cc2oc3cc(OCCCCCCCN(C)Cc4ccccc4)ccc3c(=O)c2cc1OC	CHEMBL224981	0
COc1ccc2c(=O)c3ccc(OCCCCCCCN(C)Cc4ccccc4)cc3oc2c1	CHEMBL225366	0
COc1ccc(CN(C)CCCCCCCOc2ccc3c(=O)c4ccccc4oc3c2)cc1	CHEMBL225396	0
COc1cccc(CN(C)CCCCCCCOc2ccc3c(=O)c4ccccc4oc3c2)c1	CHEMBL225451	0
CN(CCCCCCCOc1ccc2c(=O)c3ccccc3oc2c1)Cc1ccccc1Cl	CHEMBL225453	0
CN(CCCOc1ccc2c(=O)c3ccccc3oc2c1)Cc1ccccc1	CHEMBL225610	0
CN(CCCCOc1ccc2c(=O)c3ccccc3oc2c1)Cc1ccccc1	CHEMBL225611	0
COc1ccc(OC)c(CN(C)CCCCCCCOc2ccc3c(=O)c4ccccc4oc3c2)c1	CHEMBL225615	0
Cc1ccccc1CN(C)CCCCCCCOc1ccc2c(=O)c3ccccc3oc2c1	CHEMBL225638	0
c1cc[n+](CCCCCCCC[n+]2ccccc2)cc1	CHEMBL225688	0
COc1ccc(/C=N/NC(=O)CN2CCN(Cc3ccccc3)CC2)cc1OC	CHEMBL2323351	0
COc1ccc(/C=N/NC(=O)CN2CCN(Cc3ccccc3)CC2)cc1	CHEMBL2323352	0
CCOc1ccc(/C=N/NC(=O)CN2CCN(Cc3ccccc3)CC2)cc1	CHEMBL2323353	0
COc1ccc(/C=N/NC(=O)CN2CCC(Cc3ccccc3)CC2)cc1OC	CHEMBL2323354	0
Cc1ccc(/C=C2\CN(C(=O)C[C@H]3C[C@H]4CCCN4[C@]34C(=O)Nc3ccccc34)C[C@@]3(C[C@H]4CCCN4[C@@]34C(=O)Nc3ccccc34)C2=O)cc1	CHEMBL2332530	0
O=C(C[C@H]1C[C@H]2CCCN2[C@]12C(=O)Nc1ccccc12)N1C/C(=C\c2ccc(Cl)cc2Cl)C(=O)[C@]2(C[C@H]3CCCN3[C@@]23C(=O)Nc2ccccc23)C1	CHEMBL2332531	0
O=C(C[C@H]1C[C@H]2CCCN2[C@]12C(=O)Nc1ccccc12)N1C/C(=C\c2cccc([N+](=O)[O-])c2)C(=O)[C@]2(C[C@H]3CCCN3[C@@]23C(=O)Nc2ccccc23)C1	CHEMBL2332532	0
O=C(C[C@H]1C[C@H]2CCCN2[C@]12C(=O)Nc1ccccc12)N1C/C(=C\c2ccccc2F)C(=O)[C@]2(C[C@H]3CCCN3[C@@]23C(=O)Nc2ccccc23)C1	CHEMBL2332533	0
O=C(C[C@H]1C[C@H]2CCCN2[C@]12C(=O)Nc1ccccc12)N1C/C(=C\c2ccccc2Cl)C(=O)[C@]2(C[C@H]3CCCN3[C@@]23C(=O)Nc2ccccc23)C1	CHEMBL2332534	0
C=CC(=O)N1C/C(=C\c2ccccc2Cl)C(=O)/C(=C/c2ccccc2Cl)C1	CHEMBL2332535	0
C=CC(=O)N1C/C(=C\c2ccccc2F)C(=O)/C(=C/c2ccccc2F)C1	CHEMBL2332536	0
C=CC(=O)N1C/C(=C\c2cccc([N+](=O)[O-])c2)C(=O)/C(=C/c2cccc([N+](=O)[O-])c2)C1	CHEMBL2332537	0
C=CC(=O)N1C/C(=C\c2ccccc2C)C(=O)/C(=C/c2ccccc2C)C1	CHEMBL2332538	0
C=CC(=O)N1C/C(=C\c2ccccc2OC)C(=O)/C(=C/c2ccccc2OC)C1	CHEMBL2332539	0
O=C(C[C@H]1C[C@H]2CCCN2[C@]12C(=O)Nc1ccccc12)N1C/C(=C\c2ccc(F)cc2)C(=O)[C@]2(C[C@H]3CCCN3[C@@]23C(=O)Nc2ccccc23)C1	CHEMBL2332540	0
O=C(C[C@H]1C[C@H]2CCCN2[C@]12C(=O)Nc1ccccc12)N1C/C(=C\c2ccc(Cl)cc2)C(=O)[C@]2(C[C@H]3CCCN3[C@@]23C(=O)Nc2ccccc23)C1	CHEMBL2332541	0
COc1ccccc1/C=C1\CN(C(=O)C[C@H]2C[C@H]3CCCN3[C@]23C(=O)Nc2ccccc23)C[C@@]2(C[C@H]3CCCN3[C@@]23C(=O)Nc2ccccc23)C1=O	CHEMBL2332542	0
Cc1ccccc1/C=C1\CN(C(=O)C[C@H]2C[C@H]3CCCN3[C@]23C(=O)Nc2ccccc23)C[C@@]2(C[C@H]3CCCN3[C@@]23C(=O)Nc2ccccc23)C1=O	CHEMBL2332543	0
O=C(C[C@H]1C[C@H]2CCCN2[C@]12C(=O)Nc1ccccc12)N1C/C(=C\c2ccccc2)C(=O)[C@]2(C[C@H]3CCCN3[C@@]23C(=O)Nc2ccccc23)C1	CHEMBL2332544	0
O=C1/C(=C/c2cccc3ccccc23)CN(C(=O)C[C@H]2C[C@H]3CCCN3[C@]23C(=O)Nc2ccccc23)C/C1=C\c1cccc2ccccc12	CHEMBL2332545	0
C=CC(=O)N1C/C(=C\c2ccc(Cl)cc2Cl)C(=O)/C(=C/c2ccc(Cl)cc2Cl)C1	CHEMBL2332546	0
C=CC(=O)N1C/C(=C\c2cccc3ccccc23)C(=O)/C(=C/c2cccc3ccccc23)C1	CHEMBL2332547	0
O=C1/C(=C/c2ccccc2)CN(C(=O)C[C@H]2C[C@H]3CCCN3[C@]23C(=O)Nc2ccccc23)C/C1=C\c1ccccc1	CHEMBL2332548	0
Cc1ccccc1/C=C1\CN(C(=O)C[C@H]2C[C@H]3CCCN3[C@]23C(=O)Nc2ccccc23)C/C(=C\c2ccccc2C)C1=O	CHEMBL2332549	0
COc1ccccc1/C=C1\CN(C(=O)C[C@H]2C[C@H]3CCCN3[C@]23C(=O)Nc2ccccc23)C/C(=C\c2ccccc2OC)C1=O	CHEMBL2332550	0
O=C1/C(=C/c2ccccc2Cl)CN(C(=O)C[C@H]2C[C@H]3CCCN3[C@]23C(=O)Nc2ccccc23)C/C1=C\c1ccccc1Cl	CHEMBL2332974	0
O=C1/C(=C/c2ccccc2F)CN(C(=O)C[C@H]2C[C@H]3CCCN3[C@]23C(=O)Nc2ccccc23)C/C1=C\c1ccccc1F	CHEMBL2332975	0
O=C1/C(=C/c2cccc([N+](=O)[O-])c2)CN(C(=O)C[C@H]2C[C@H]3CCCN3[C@]23C(=O)Nc2ccccc23)C/C1=C\c1cccc([N+](=O)[O-])c1	CHEMBL2332976	0
O=C1/C(=C/c2ccc(Cl)cc2Cl)CN(C(=O)C[C@H]2C[C@H]3CCCN3[C@]23C(=O)Nc2ccccc23)C/C1=C\c1ccc(Cl)cc1Cl	CHEMBL2332977	0
Cc1ccc(/C=C2\CN(C(=O)C[C@H]3C[C@H]4CCCN4[C@]34C(=O)Nc3ccccc34)C/C(=C\c3ccc(C)cc3)C2=O)cc1	CHEMBL2332978	0
O=C1/C(=C/c2ccc(Cl)cc2)CN(C(=O)C[C@H]2C[C@H]3CCCN3[C@]23C(=O)Nc2ccccc23)C/C1=C\c1ccc(Cl)cc1	CHEMBL2332979	0
O=C1/C(=C/c2ccc(F)cc2)CN(C(=O)C[C@H]2C[C@H]3CCCN3[C@]23C(=O)Nc2ccccc23)C/C1=C\c1ccc(F)cc1	CHEMBL2332980	0
O=C(C[C@H]1C[C@H]2CCCN2[C@]12C(=O)Nc1ccccc12)N1C/C(=C\c2cccc3ccccc23)C(=O)[C@]2(C[C@H]3CCCN3[C@@]23C(=O)Nc2ccccc23)C1	CHEMBL2332981	0
CC[C@H](C)C1=NC[C@]2(C)[C@H](CC=C3C[C@H]4C(=O)C[C@]5(C)[C@@H]([C@H](C)N(C)C)[C@H](O)C[C@@]5(C)[C@@H]4CC[C@H]32)N1	CHEMBL235548	0
Fc1cccc(Cc2nnc3sc(-c4ccoc4)nn23)c1	CHEMBL2375480	0
COc1ccc(-c2nnc3sc(-c4ccoc4)nn23)cc1	CHEMBL2375481	0
Brc1ccc(-c2nnc3sc(-c4ccoc4)nn23)cc1	CHEMBL2375482	0
Clc1ccccc1-c1nnc2sc(-c3ccoc3)nn12	CHEMBL2377873	0
Clc1ccc(-c2nnc3sc(-c4ccoc4)nn23)cc1	CHEMBL2377874	0
Fc1ccccc1Cc1nnc2sc(-c3ccoc3)nn12	CHEMBL2377875	0
Fc1ccc(Cc2nnc3sc(-c4ccoc4)nn23)cc1	CHEMBL2377876	0
COc1ccccc1-c1nnc2sc(-c3ccoc3)nn12	CHEMBL2377877	0
COc1cccc(-c2nnc3sc(-c4ccoc4)nn23)c1	CHEMBL2377878	0
CC(C)C1=NC[C@]2(C)[C@H](CC[C@]34C[C@]35C(=O)C[C@]3(C)[C@@H]([C@H](C)N(C)C)[C@H](O)C[C@@]3(C)[C@@H]5CC[C@@H]24)N1	CHEMBL238062	0
CC[C@H](C)C1=NC[C@]2(C)[C@H](CC[C@]34C[C@]35C(=O)C[C@]3(C)[C@@H]([C@H](C)N(C)C)[C@H](O)C[C@@]3(C)[C@@H]5CC[C@@H]24)N1	CHEMBL238063	0
O=C1/C(=C/c2cccc3ccccc23)CN(C(=O)[C@H]2C[C@H]3CCCN3[C@]23C(=O)Nc2cc(Cl)ccc23)C/C1=C\c1cccc2ccccc12	CHEMBL2380667	0
O=C1/C(=C/c2ccccc2)CN(C(=O)[C@H]2C[C@H]3CCCN3[C@]23C(=O)Nc2cc(Cl)ccc23)C/C1=C\c1ccccc1	CHEMBL2380668	0
Cc1ccccc1/C=C1\CN(C(=O)[C@H]2C[C@H]3CCCN3[C@]23C(=O)Nc2cc(Cl)ccc23)C/C(=C\c2ccccc2C)C1=O	CHEMBL2380669	0
COc1ccccc1/C=C1\CN(C(=O)[C@H]2C[C@H]3CCCN3[C@]23C(=O)Nc2cc(Cl)ccc23)C/C(=C\c2ccccc2OC)C1=O	CHEMBL2380670	0
O=C1/C(=C/c2ccccc2Cl)CN(C(=O)[C@H]2C[C@H]3CCCN3[C@]23C(=O)Nc2cc(Cl)ccc23)C/C1=C\c1ccccc1Cl	CHEMBL2380671	0
O=C1/C(=C/c2ccccc2F)CN(C(=O)[C@H]2C[C@H]3CCCN3[C@]23C(=O)Nc2cc(Cl)ccc23)C/C1=C\c1ccccc1F	CHEMBL2380672	0
O=C1/C(=C/c2cccc([N+](=O)[O-])c2)CN(C(=O)[C@H]2C[C@H]3CCCN3[C@]23C(=O)Nc2cc(Cl)ccc23)C/C1=C\c1cccc([N+](=O)[O-])c1	CHEMBL2380673	0
O=C1/C(=C/c2ccc(Cl)cc2Cl)CN(C(=O)[C@H]2C[C@H]3CCCN3[C@]23C(=O)Nc2cc(Cl)ccc23)C/C1=C\c1ccc(Cl)cc1Cl	CHEMBL2380674	0
Cc1ccc(/C=C2\CN(C(=O)[C@H]3C[C@H]4CCCN4[C@]34C(=O)Nc3cc(Cl)ccc34)C/C(=C\c3ccc(C)cc3)C2=O)cc1	CHEMBL2380675	0
O=C1/C(=C/c2ccc(Cl)cc2)CN(C(=O)[C@H]2C[C@H]3CCCN3[C@]23C(=O)Nc2cc(Cl)ccc23)C/C1=C\c1ccc(Cl)cc1	CHEMBL2380676	0
O=C1/C(=C/c2ccc(F)cc2)CN(C(=O)[C@H]2C[C@H]3CCCN3[C@]23C(=O)Nc2cc(Cl)ccc23)C/C1=C\c1ccc(F)cc1	CHEMBL2380677	0
COc1ccc2cc(C(=O)CN3CCN(Cc4ccccc4)CC3)c(=O)oc2c1	CHEMBL2381401	0
NC(=O)c1cc[n+](C/C=C/C[n+]2ccc(/C=N/O)cc2)cc1	CHEMBL238977	0
O=C(c1ccccc1)N1c2ccccc2Sc2ccccc21	CHEMBL239400	0
COc1ccc(C(=O)N2c3ccccc3Sc3ccccc32)cc1	CHEMBL239618	0
CN(C)CCCN(c1nc2ccccc2[nH]1)c1nc2ccccc2[nH]1	CHEMBL2396910	0
c1ccc2[nH]c(N3CCCCC3)nc2c1	CHEMBL2396912	0
CC1CCCCN1c1nc2ccccc2[nH]1	CHEMBL2396913	0
O=C(CCc1ccccc1)N1c2ccccc2Sc2ccccc21	CHEMBL240047	0
CC1=C[C@H]2Cc3[nH]c(=O)ccc3[C@@]3(C1)[C@@H]2[C@H](Cl)CCN3C	CHEMBL2409140	0
CC1=C[C@H]2Cc3[nH]c(=O)ccc3[C@@]3(C1)[C@@H]2[C@H](C)CN3C	CHEMBL2409141	0
CC(C)N(CCOc1ccc(-c2nc3ccccc3[nH]2)cc1)C(C)C	CHEMBL2413558	0
c1ccc2[nH]c(-c3ccc(OCCN4CCCC4)cc3)nc2c1	CHEMBL2413559	0
c1ccc2[nH]c(-c3ccc(OCCN4CCCCC4)cc3)nc2c1	CHEMBL2413560	0
Cc1ccc2nc(-c3ccc(OCCN(C)C)cc3)[nH]c2c1	CHEMBL2413733	0
CCN(CC)CCOc1ccc(-c2nc3ccc(C)cc3[nH]2)cc1	CHEMBL2413734	0
Cc1ccc2nc(-c3ccc(OCCN4CCOCC4)cc3)[nH]c2c1	CHEMBL2413737	0
CN(C)CCOc1ccc(-c2nc3ccc(Cl)cc3[nH]2)cc1	CHEMBL2413739	0
CCN(CC)CCOc1ccc(-c2nc3ccc(Cl)cc3[nH]2)cc1	CHEMBL2413740	0
CC(C)N(CCOc1ccc(-c2nc3ccc(Cl)cc3[nH]2)cc1)C(C)C	CHEMBL2413741	0
Clc1ccc2nc(-c3ccc(OCCN4CCCC4)cc3)[nH]c2c1	CHEMBL2413742	0
Clc1ccc2nc(-c3ccc(OCCN4CCOCC4)cc3)[nH]c2c1	CHEMBL2413744	0
CN(C)CCOc1ccc(-c2nc3ccccc3[nH]2)cc1	CHEMBL2413746	0
COc1cc2oc(-c3ccc(CN(C)Cc4ccccc4)cc3)cc(=O)c2cc1OC	CHEMBL241827	0
COc1ccc2oc(-c3ccc(CN(C)Cc4ccccc4)cc3)cc(=O)c2c1	CHEMBL241828	0
COc1ccc2c(=O)cc(-c3ccc(CN(C)Cc4ccccc4)cc3)oc2c1	CHEMBL241830	0
N#Cc1c(Cl)nc(NC2CCN(Cc3ccccc3)CC2)c(C#N)c1-c1ccccc1	CHEMBL2419681	0
N#Cc1c(Cl)nc(NCCC2CCN(Cc3ccccc3)CC2)c(C#N)c1-c1ccccc1	CHEMBL2419682	0
N#Cc1c(Cl)nc(NCCCC2CCN(Cc3ccccc3)CC2)c(C#N)c1-c1ccccc1	CHEMBL2419683	0
N#Cc1cc(C#N)c(NC2CCN(Cc3ccccc3)CC2)nc1Cl	CHEMBL2419685	0
N#Cc1c(NCCC2CCN(Cc3ccccc3)CC2)nc(NCCC2CCN(Cc3ccccc3)CC2)c(C#N)c1-c1ccccc1	CHEMBL2419689	0
N#Cc1cc(C#N)c(NC2CCN(Cc3ccccc3)CC2)nc1NC1CCN(Cc2ccccc2)CC1	CHEMBL2419690	0
CCN(Cc1ccccc1OC)C(=O)CCCCCNC1=CC(=O)C(NCCCCCC(=O)N(CC)Cc2ccccc2OC)=CC1=O	CHEMBL242190	0
COc1ccccc1CNCCCCCCN1CCC(CCC2CCN(CCCCCCNCc3ccccc3OC)CC2)CC1	CHEMBL242345	0
O=C(NN=CC1C(=O)NC(=S)NC1=O)Nc1ccccc1	CHEMBL2425407	0
O=C1NC(=S)NC(=O)C1C=NNC(=S)Nc1ccccc1	CHEMBL2425408	0
O=C1NC(=S)NC(=O)C1C=NNC(=S)Nc1ccc(F)cc1	CHEMBL2425409	0
O=C1NC(=S)NC(=O)C1C=NNC(=S)Nc1ccc(Cl)cc1	CHEMBL2425410	0
O=C1NC(=S)NC(=O)C1C=NNC(=S)Nc1ccc(Br)cc1	CHEMBL2425412	0
O=C1NC(=O)C(C=NNC(=S)Nc2cccc(C(F)(F)F)c2)C(=O)N1	CHEMBL2425413	0
O=C1NC(=S)NC(=O)C1C=NNC(=S)Nc1ccc(C(F)(F)F)cc1	CHEMBL2425414	0
COc1ccc(NC(=S)NN=CC2C(=O)NC(=S)NC2=O)cc1	CHEMBL2425415	0
CC(=O)NC=C1C(=O)NC(=O)NC1=O	CHEMBL2425417	0
NC(=S)NN=CC1C(=O)NC(=O)NC1=O	CHEMBL2425418	0
COc1cc2cc(-c3ccc(CN(C)Cc4ccc([N+](=O)[O-])cc4)cc3)c(=O)oc2cc1OC	CHEMBL242906	0
COc1ccc2cc(-c3cccc(CN(C)Cc4ccccc4)c3)c(=O)oc2c1	CHEMBL243311	0
COc1ccc(-c2cc3c(c(=O)o2)C(=O)C2[C@@]4(C)CC[C@H](O)[C@@](C)(CO)C4C[C@H](O)[C@@]2(C)O3)cc1	CHEMBL24416	0
COc1ccc(CN(C)Cc2ccc(-c3cc4cc(OC)c(OC)cc4oc3=O)cc2)cc1	CHEMBL244415	0
COc1cc2oc3cc(CN(C)Cc4ccccc4)ccc3c(=O)c2cc1OC	CHEMBL244837	0
COc1cc2occ(-c3ccc(CN(C)Cc4ccccc4)cc3)c(=O)c2cc1OC	CHEMBL244838	0
COc1cc2occ(-c3cccc(CN(C)Cc4ccccc4)c3)c(=O)c2cc1OC	CHEMBL245054	0
COc1cc2oc(-c3cccc(CN(C)Cc4ccccc4)c3)cc(=O)c2cc1OC	CHEMBL245055	0
C[C@]12CC[C@H](O)[C@@](C)(CO)C1C[C@H](O)[C@@]1(C)Oc3cc(-c4ccncc4)oc(=O)c3C(=O)C21	CHEMBL24519	0
COc1ccc(-c2cc3c(c(=O)o2)C(=O)C2[C@@]4(C)CC[C@H](O)[C@@](C)(CO)C4C[C@H](O)[C@@]2(C)O3)cc1OC	CHEMBL24844	0
C[C@]12CC[C@H](O)[C@@](C)(CO)C1C[C@H](O)[C@@]1(C)Oc3cc(-c4ccc(Cl)nc4)oc(=O)c3C(=O)C21	CHEMBL25149	0
CCOC(=O)c1c(C)nc2nc3c(c(N)c2c1-c1ccc(OC)cc1)CCCCC3	CHEMBL252378	0
CCOC(=O)c1c(C)nc2nc3c(c(N)c2c1-c1ccc(OC)c(OC)c1)CCCC3	CHEMBL252379	0
CCOC(=O)c1c(C)nc2nc3c(c(N)c2c1-c1ccc(F)cc1)CCCCC3	CHEMBL252578	0
CCOC(=O)c1c(C)nc2nc3c(c(N)c2c1-c1ccc(Cl)cc1)CCCC3	CHEMBL252579	0
CCOC(=O)c1c(C)nc2nc3c(c(N)c2c1-c1ccc(OC)c(OC)c1)CCCCC3	CHEMBL252580	0
Cc1nc2nc3c(c(N)c2c(-c2ccccc2)c1C(=O)OC(C)C)CCCC3	CHEMBL252781	0
COc1cc([C@@H]2CC(=O)c3c(cc(O)c(C/C=C(\C)CCC=C(C)C)c3O)O2)ccc1O	CHEMBL253152	0
CCOC(=O)c1c(C)nc2nc3c(c(N)c2c1-c1ccccc1)CCCCC3	CHEMBL253602	0
CCOC(=O)c1c(C)nc2nc3c(c(N)c2c1-c1ccc(OC)cc1)CCCC3	CHEMBL253603	0
CCOC(=O)c1c(C)nc2nc3c(c(N)c2c1-c1ccncc1)CCC3	CHEMBL253782	0
CCOC(=O)c1c(C)nc2nc3c(c(N)c2c1-c1ccncc1)CCCC3	CHEMBL253783	0
C#CCN[C@@H]1CCc2cc(Cl)c(OC(=O)N(C)CCC)cc21	CHEMBL255230	0
C#CCN[C@@H]1CCc2ccc(OC(=O)N(C)CC)cc21	CHEMBL255231	0
C[C@]12CC[C@H](O)[C@@](C)(CO)C1C[C@H](O)[C@@]1(C)Oc3cc(-c4ccccn4)oc(=O)c3C(=O)C21	CHEMBL25524	0
C[C@]12CC[C@H](O)[C@@](C)(CO)C1C[C@H](O)[C@@]1(C)Oc3cc(-c4cccnc4)oc(=O)c3C(=O)C21	CHEMBL25629	0
CC[C@@]1(c2cccc(O)c2)CCCCN(CCCCCCCCCCN2CCCC[C@@](CC)(c3cccc(O)c3)C2)C1	CHEMBL259523	0
C[C@]12CC[C@H](O)[C@@](C)(CO)C1C[C@H](O)[C@@]1(C)Oc3cc(-c4ccccc4)oc(=O)c3C(=O)C21	CHEMBL277665	0
CN(C)C(=O)Oc1cccc([N+](C)(C)C)c1	CHEMBL278020	0
COc1ccccc1CNCCCCCCNCCCCCCNCCCCCCNCc1ccccc1OC	CHEMBL302179	0
CN1CC[C@@]2(C)c3cc(OC(=O)NCCCCCN4CCOCC4)ccc3N(C)[C@@H]12	CHEMBL303574	0
CN1CC[C@@]2(C)c3cc(OC(=O)NC(C)(C)C)ccc3N(C)[C@@H]12	CHEMBL308503	0
CC1=C(CC(=O)NCCCNCCCNC2=CC(=O)C(NCCCNCCCNC(=O)CC3=C(C)/C(=C\c4ccc(S(C)=O)cc4)c4ccc(F)cc43)=CC2=O)c2cc(F)ccc2/C1=C/c1ccc(S(C)=O)cc1	CHEMBL3087675	0
COc1ccc2c(c1)c(CC(=O)NCCCNCCCNC1=CC(=O)C(NCCCNCCCNC(=O)Cc3c(C)n(C(=O)c4ccc(Cl)cc4)c4ccc(OC)cc34)=CC1=O)c(C)n2C(=O)c1ccc(Cl)cc1	CHEMBL3087677	0
C[C@@H](C(=O)NCCCNCCCNC1=CC(=O)C(NCCCNCCCNC(=O)[C@H](C)c2ccc(-c3ccccc3)c(F)c2)=CC1=O)c1ccc(-c2ccccc2)c(F)c1	CHEMBL3087679	0
C[C@H](C(=O)NCCCNCCCNC1=CC(=O)C(NCCCNCCCNC(=O)[C@@H](C)c2ccc(-c3ccccc3)c(F)c2)=CC1=O)c1ccc(-c2ccccc2)c(F)c1	CHEMBL3087680	0
CC(C(=O)NCCCNCCCNC1=CC(=O)c2ccccc2C1=O)c1ccc(-c2ccccc2)c(F)c1	CHEMBL3087683	0
COc1cc2[se]n(-c3ccc(OCCCN4CCCCC4)cc3)c(=O)c2cc1OC	CHEMBL3112614	0
COc1cc2[se]n(-c3ccc(CN4CCCC4)cc3)c(=O)c2cc1OC	CHEMBL3115020	0
COc1cc2[se]n(-c3ccc(CN4CCCCC4)cc3)c(=O)c2cc1OC	CHEMBL3115021	0
COc1cc2[se]n(-c3ccc(CCN4CCCC4)cc3)c(=O)c2cc1OC	CHEMBL3115023	0
COc1cc2[se]n(-c3ccc(CCN4CCCCC4)cc3)c(=O)c2cc1OC	CHEMBL3115024	0
COc1cc2[se]n(-c3ccc(OCCCCN4CCCCC4)cc3)c(=O)c2cc1OC	CHEMBL3115026	0
O=c1c2ccccc2[se]n1-c1ccc(CN2CCCCC2)cc1	CHEMBL3115027	0
O=c1c2ccccc2[se]n1-c1ccc(OCCN2CCCCC2)cc1	CHEMBL3115029	0
COc1ccccc1/C=C1\CN(C(=O)[C@@H]2CCN(C)[C@]23C(=O)Nc2ccccc23)C[C@]2(C1=O)[C@H](c1ccccc1OC)CN(C)[C@]21C(=O)Nc2ccccc21	CHEMBL3115030	0
CN1C[C@@H](c2ccccc2Cl)[C@@]2(CN(C(=O)[C@@H]3CCN(C)[C@]34C(=O)Nc3ccccc34)C/C(=C\c3ccccc3Cl)C2=O)[C@@]12C(=O)Nc1ccccc12	CHEMBL3115031	0
CN1C[C@@H](c2ccccc2F)[C@@]2(CN(C(=O)[C@@H]3CCN(C)[C@]34C(=O)Nc3ccccc34)C/C(=C\c3ccccc3F)C2=O)[C@@]12C(=O)Nc1ccccc12	CHEMBL3115032	0
CN1C[C@@H](c2cccc([N+](=O)[O-])c2)[C@@]2(CN(C(=O)[C@@H]3CCN(C)[C@]34C(=O)Nc3ccccc34)C/C(=C\c3cccc([N+](=O)[O-])c3)C2=O)[C@@]12C(=O)Nc1ccccc12	CHEMBL3115033	0
CN1C[C@@H](c2ccc(Cl)cc2Cl)[C@@]2(CN(C(=O)[C@@H]3CCN(C)[C@]34C(=O)Nc3ccccc34)C/C(=C\c3ccc(Cl)cc3Cl)C2=O)[C@@]12C(=O)Nc1ccccc12	CHEMBL3115034	0
Cc1ccc(/C=C2\CN(C(=O)[C@@H]3CCN(C)[C@]34C(=O)Nc3ccccc34)C[C@]3(C2=O)[C@H](c2ccc(C)cc2)CN(C)[C@]32C(=O)Nc3ccccc32)cc1	CHEMBL3115035	0
CN1C[C@@H](c2ccc(Cl)cc2)[C@@]2(CN(C(=O)[C@@H]3CCN(C)[C@]34C(=O)Nc3ccccc34)C/C(=C\c3ccc(Cl)cc3)C2=O)[C@@]12C(=O)Nc1ccccc12	CHEMBL3115036	0
CN1C[C@@H](c2cccc3ccccc23)[C@@]2(CN(C(=O)[C@@H]3CCN(C)[C@]34C(=O)Nc3ccccc34)CC(=Cc3cccc4ccccc34)C2=O)[C@@]12C(=O)Nc1ccccc12	CHEMBL3115038	0
C=CC(=O)N1C/C(=C\c2ccccc2)C(=O)[C@@]2(C1)[C@H](c1ccccc1)CN(C)[C@]21C(=O)Nc2ccccc21	CHEMBL3115039	0
C=CC(=O)N1C/C(=C\c2ccccc2C)C(=O)[C@@]2(C1)[C@H](c1ccccc1C)CN(C)[C@]21C(=O)Nc2ccccc21	CHEMBL3115040	0
C=CC(=O)N1C/C(=C\c2ccccc2OC)C(=O)[C@@]2(C1)[C@H](c1ccccc1OC)CN(C)[C@]21C(=O)Nc2ccccc21	CHEMBL3115041	0
C=CC(=O)N1C/C(=C\c2ccccc2Cl)C(=O)[C@@]2(C1)[C@H](c1ccccc1Cl)CN(C)[C@]21C(=O)Nc2ccccc21	CHEMBL3115042	0
C=CC(=O)N1C/C(=C\c2ccccc2F)C(=O)[C@@]2(C1)[C@H](c1ccccc1F)CN(C)[C@]21C(=O)Nc2ccccc21	CHEMBL3115043	0
C=CC(=O)N1C/C(=C\c2cccc([N+](=O)[O-])c2)C(=O)[C@@]2(C1)[C@H](c1cccc([N+](=O)[O-])c1)CN(C)[C@]21C(=O)Nc2ccccc21	CHEMBL3115044	0
C=CC(=O)N1C/C(=C\c2ccc(Cl)cc2Cl)C(=O)[C@@]2(C1)[C@H](c1ccc(Cl)cc1Cl)CN(C)[C@]21C(=O)Nc2ccccc21	CHEMBL3115045	0
C=CC(=O)N1C/C(=C\c2ccc(C)cc2)C(=O)[C@@]2(C1)[C@H](c1ccc(C)cc1)CN(C)[C@]21C(=O)Nc2ccccc21	CHEMBL3115046	0
C=CC(=O)N1C/C(=C\c2ccc(Cl)cc2)C(=O)[C@@]2(C1)[C@H](c1ccc(Cl)cc1)CN(C)[C@]21C(=O)Nc2ccccc21	CHEMBL3115047	0
C=CC(=O)N1C/C(=C\c2ccc(F)cc2)C(=O)[C@@]2(C1)[C@H](c1ccc(F)cc1)CN(C)[C@]21C(=O)Nc2ccccc21	CHEMBL3115048	0
C=CC(=O)N1C/C(=C\c2cccc3ccccc23)C(=O)[C@@]2(C1)[C@H](c1cccc3ccccc13)CN(C)[C@]21C(=O)Nc2ccccc21	CHEMBL3115196	0
CN1C[C@@H](c2ccccc2)[C@@]2(CN(C(=O)[C@@H]3CCN(C)[C@]34C(=O)Nc3ccccc34)C/C(=C\c3ccccc3)C2=O)[C@@]12C(=O)Nc1ccccc12	CHEMBL3115197	0
Cc1ccccc1/C=C1\CN(C(=O)[C@@H]2CCN(C)[C@]23C(=O)Nc2ccccc23)C[C@]2(C1=O)[C@H](c1ccccc1C)CN(C)[C@]21C(=O)Nc2ccccc21	CHEMBL3115198	0
c1ccc2c(c1)cc1ccc3cccc4ccc2c1c34	CHEMBL31184	0
CCOC(=O)c1ccc2nc(-c3cccnc3)c3c(c2c1)N(Cc1ccccc1)CCC3	CHEMBL3122145	0
CCOC(=O)c1ccc2nc(-c3cccnc3)c3c(c2c1)NCCC3	CHEMBL3122166	0
CCNCc1ccc2nc(-c3cccnc3)c3c(c2c1)NCCC3	CHEMBL3122169	0
CCOC(=O)c1ccc2nc(-c3ccc(Cl)cc3)c3c(c2c1)N(Cc1ccccc1)C(=O)CC3	CHEMBL3122170	0
CCOC(=O)c1ccc2nc(-c3cccnc3)c3c(c2c1)N(Cc1ccccc1)C(=O)CC3	CHEMBL3122171	0
CCN(CCCCOc1ccc(-c2coc3cc(O)cc(O)c3c2=O)cc1)Cc1ccccc1OC	CHEMBL3126996	0
CCN(CCCCCCOc1cc(O)c2c(=O)c(-c3ccc(O)cc3)coc2c1)Cc1ccccc1	CHEMBL3127006	0
Cn1ncc2c1-c1sccc1C2NC(=O)CN1CCN(Cc2ccccc2F)CC1	CHEMBL3133430	0
O=C(CN1CCN(Cc2ccccc2)CC1)NC1c2c[nH]nc2-c2c(Br)sc(Br)c21	CHEMBL3133432	0
COc1cc2c(cc1OC)C(NC(=O)CN1CCN(Cc3ccccc3)CC1)c1cnn(C)c1-2	CHEMBL3133439	0
COc1cc2c(cc1OC)C(NC(=O)CN1CCN(Cc3ccccc3)CC1)c1cnn(-c3ccccc3)c1-2	CHEMBL3133440	0
COc1cc2c(cc1OC)C(NC(=O)CN1CCN(Cc3ccccc3F)CC1)c1cnn(C)c1-2	CHEMBL3133442	0
COc1cc2c(cc1OC)C(NC(=O)CN1CCN(Cc3ccccc3F)CC1)c1cnn(-c3ccccc3)c1-2	CHEMBL3133443	0
O=C(CN1CCN(Cc2ccccc2)CC1)NC1c2c[nH]nc2-c2sccc21	CHEMBL3133444	0
CNC(=O)Oc1ccc2c(c1)[C@@]1(C)CCN(C)C1N2Cc1ccccc1	CHEMBL317162	0
C[N+](C)(C)CCOC(=O)Sc1ccccc1	CHEMBL318749	0
Cc1ccc(C(=O)Nc2cc3cc(C)ccc3oc2=O)cc1	CHEMBL3220507	0
COc1ccc(C(=O)Nc2cc3ccccc3oc2=O)cc1	CHEMBL3220508	0
O=C(Nc1cc2ccccc2oc1=O)c1ccc(Cl)cc1	CHEMBL3220509	0
O=C(Nc1cc2ccccc2oc1=O)c1ccc([N+](=O)[O-])cc1	CHEMBL3220510	0
O=C(Nc1cc2ccccc2oc1=O)c1ccc(Cl)c(Cl)c1	CHEMBL3220513	0
C[C@@]12CC[C@H]3[C@]4(C)CCC[C@@](C)(C(=O)OCC[N+](C)(C)C)[C@H]4CC[C@]3(CC1=O)C2	CHEMBL3220801	0
C[C@@]12CC[C@H]3[C@]4(C)CCC[C@@](C)(C(=O)OCC[N+](C)(C)Cc5ccccc5)[C@H]4CC[C@]3(CC1=O)C2	CHEMBL3220802	0
C[C@@]12CC[C@H]3[C@]4(C)CCC[C@@](C)(C(=O)OCC[N+](C)(C)CCCCCCCCCC[N+](C)(C)CCOC(=O)[C@]5(C)CCC[C@]6(C)[C@@H]5CC[C@@]57CC(=O)[C@@](C)(CC[C@@H]65)C7)[C@H]4CC[C@]3(CC1=O)C2	CHEMBL3220803	0
C[C@@]12CC[C@H]3[C@]4(C)CCC[C@@](C)(C(=O)OCC[N+](C)(C)CCCCCCCCCCCC[N+](C)(C)CCOC(=O)[C@]5(C)CCC[C@]6(C)[C@@H]5CC[C@@]57CC(=O)[C@@](C)(CC[C@@H]65)C7)[C@H]4CC[C@]3(CC1=O)C2	CHEMBL3220804	0
C[C@@]12CC[C@H]3[C@]4(C)CCC[C@@]5(C)C(=O)OCC[N+](C)(C)CCCCCCCCC[N+](C)(C)CCOC(=O)[C@]6(C)CCC[C@]7(C)[C@@H]6CC[C@@]68C[C@@H](OC(=O)CCCCCCCCC(=O)O[C@@H]1C[C@@]3(CC[C@@H]45)C2)[C@@](C)(CC[C@@H]76)C8	CHEMBL3220805	0
CC[N+](CC)(CC)CCOCCOCCOC(=O)[C@]1(C)CCC[C@]2(C)[C@@H]1CC[C@@]13CC(=O)[C@@](C)(CC[C@@H]21)C3	CHEMBL3220806	0
C[C@H]1C[C@@]23CC[C@H]4[C@@](C)(CCC[C@@]4(C)C(=O)OCC[N+](C)(C)C)[C@@H]2CC[C@]1(Cl)C3	CHEMBL3220807	0
C[C@H]1C[C@@]23CC[C@H]4[C@@](C)(CCC[C@@]4(C)C(=O)OCC[N+](C)(C)Cc4ccccc4)[C@@H]2CC[C@]1(Cl)C3	CHEMBL3220808	0
CC(C)CCSC(=O)OCC[N+](C)(C)C	CHEMBL322628	0
COc1ccc(C(C#N)N2CCN(C)CC2)cc1OC	CHEMBL3233022	0
COc1ccc(C(C#N)N2CCCC2)cc1OC	CHEMBL3233990	0
COc1ccc(C(C#N)N2CCOCC2)cc1OC	CHEMBL3233991	0
N#CC(c1ccc2c(c1)OCO2)N1CCCCC1	CHEMBL3233992	0
N#CC(c1ccc2c(c1)OCO2)N1CCCC1	CHEMBL3233993	0
COc1cc(C(C#N)N2CCCCC2)cc(OC)c1OC	CHEMBL3233994	0
COc1cc(C(C#N)N2CCCC2)cc(OC)c1OC	CHEMBL3233995	0
COc1ccc(C(C#N)N2CCCCC2)cc1O	CHEMBL3233996	0
COc1ccc(C(C#N)N2CCCC2)cc1O	CHEMBL3233997	0
COc1ccc(C(C#N)N2CCOCC2)cc1O	CHEMBL3233998	0
COc1ccc(C(C#N)N2CCN(C)CC2)cc1O	CHEMBL3233999	0
COc1cc(C(C#N)N2CCCC2)ccc1O	CHEMBL3234000	0
COc1cc(C(C#N)N2CCN(C)CC2)ccc1O	CHEMBL3234001	0
O/N=C/c1nc(CCCCNc2c3c(nc4ccccc24)CCCC3)ccc1O	CHEMBL3234588	0
O/N=C/c1nc(CCCCCSc2c3c(nc4ccccc24)CCCC3)ccc1O	CHEMBL3234590	0
c1ccc(CCCCCSc2c3c(nc4ccccc24)CCCC3)nc1	CHEMBL3234594	0
CN(Cc1ccccc1)Cc1ccc(C(=O)c2ccc(O)c(F)c2)cc1	CHEMBL3237520	0
O=C(c1ccc(CN2CCC(CCO)CC2)cc1)c1ccc(O)c(F)c1	CHEMBL3237527	0
CC[C@H]1[C@H](C[C@H](C)C(=O)OC)O[C@]23CC[C@@H]([C@@H]4C[C@H](C)C(=O)O4)N2CCCC[C@H]13	CHEMBL3237628	0
CC[C@@H]1[C@@H]2CCCCN3[C@H]([C@@H]4C[C@@H](C)C(=O)O4)CC[C@]23[C@H]2[C@@H]1OC(=O)[C@]2(C)O	CHEMBL3237630	0
CC[C@@H]1[C@H]2OC(=O)[C@@](C)(O)[C@H]2[C@]23CC[C@@H]([C@@H]4C[C@H](C)C(=O)O4)N2CCCC[C@H]13	CHEMBL3237632	0
CC[C@H]1[C@@H]2OC(=O)[C@@](C)(O)[C@@H]2[C@@]23CC[C@@H]([C@@H]4C[C@H](C)C(=O)O4)N2CCCC[C@H]13	CHEMBL3237633	0
O=C(/C=N/O)Nc1ccc[n+](CC[n+]2cccc(NC(=O)/C=N/O)c2)c1	CHEMBL3261984	0
O=C(/C=N\O)Nc1ccc[n+](CCC[n+]2cccc(NC(=O)/C=N\O)c2)c1	CHEMBL3261985	0
O=C(/C=N\O)Nc1ccc[n+](CCCC[n+]2cccc(NC(=O)/C=N\O)c2)c1	CHEMBL3261986	0
O=C(/C=N\O)Nc1ccc[n+](CCCCC[n+]2cccc(NC(=O)/C=N\O)c2)c1	CHEMBL3261987	0
O=C(/C=N\O)Nc1ccc[n+](CCCCCC[n+]2cccc(NC(=O)/C=N\O)c2)c1	CHEMBL3261988	0
O=C(/C=N\O)Nc1ccc[n+](CCCCCCC[n+]2cccc(NC(=O)/C=N\O)c2)c1	CHEMBL3261989	0
O=C(/C=N/O)Nc1ccc[n+](Cc2ccccc2C[n+]2cccc(NC(=O)/C=N/O)c2)c1	CHEMBL3261990	0
O=C(/C=N/O)Nc1ccc[n+](Cc2cccc(C[n+]3cccc(NC(=O)/C=N/O)c3)c2)c1	CHEMBL3261991	0
O=C(/C=N/O)Nc1ccc[n+](Cc2ccc(C[n+]3cccc(NC(=O)/C=N/O)c3)cc2)c1	CHEMBL3261992	0
CCN(CC)CCCCCCOc1ccc(CC2NCCc3cc(OC)c(OC)cc32)cc1	CHEMBL3262658	0
COc1cc2c(cc1OC)C(Cc1ccc(OCCCCCCN(C)C)cc1)NCC2	CHEMBL3262661	0
CCCN(CCC)CCCCCCOc1ccc(CC2NCCc3cc(OC)c(OC)cc32)cc1	CHEMBL3262662	0
CCCCN(CCCC)CCCCCCOc1ccc(CC2NCCc3cc(OC)c(OC)cc32)cc1	CHEMBL3262663	0
COc1cc2c(cc1OC)C(Cc1ccc(OCCCCCCN3CCCC3C)cc1)NCC2	CHEMBL3262664	0
COc1cc2c(cc1OC)C(Cc1ccc(OCCCCCCN3CCCCC3C)cc1)NCC2	CHEMBL3262665	0
COc1cc2c(cc1OC)C(Cc1ccc(OCCCCCCN3CCCCC3)cc1)NCC2	CHEMBL3262666	0
COc1cc2c(cc1OC)C(Cc1ccc(OCCCCCCN3CCCC3)cc1)NCC2	CHEMBL3262667	0
COc1cc2c(cc1OC)C(Cc1ccc(OCCCCCCN3CCC(O)CC3)cc1)NCC2	CHEMBL3262668	0
COc1cc2c(cc1OC)C(Cc1ccc(OCCCCCCN3CCOCC3)cc1)NCC2	CHEMBL3262669	0
COc1cc2c(cc1OC)C(Cc1ccc(OCCCCCCN3CCC(O)(Cc4ccccc4)CC3)cc1)NCC2	CHEMBL3262670	0
COc1cc2c(cc1OC)C(Cc1ccc(OCCCCCCN3CCN(c4ccccc4)CC3)cc1)NCC2	CHEMBL3262671	0
COc1cc2c(cc1OC)C(Cc1ccc(OCCCCCCN3CCN(Cc4ccccc4)CC3)cc1)NCC2	CHEMBL3262672	0
COc1cc2c(cc1OC)C(Cc1ccc(OCCCCCCN3CCC(c4ccccc4)CC3)cc1)NCC2	CHEMBL3262673	0
CN(Cc1ccccc1)Cc1ccc(C(=O)NCCc2c[nH]c3ccccc23)cc1	CHEMBL3263724	0
CN(Cc1ccccc1)Cc1ccc(C(=O)NCCc2c[nH]c3ccc(O)cc23)cc1	CHEMBL3263725	0
COc1ccc2[nH]cc(CCNC(=O)c3ccc(CN(C)Cc4ccccc4)cc3)c2c1	CHEMBL3263726	0
COc1ccc2c(CCNC(=O)c3ccc(CN(C)Cc4ccccc4)cc3)c[nH]c2c1	CHEMBL3263727	0
CN(Cc1ccccc1)Cc1ccc(C(=O)NCCc2c[nH]c3cc(F)ccc23)cc1	CHEMBL3263728	0
CN(Cc1ccc(C(=O)NCCc2c[nH]c3ccccc23)cc1)Cc1ccccc1Cl	CHEMBL3263729	0
COc1ccc2[nH]cc(CCNC(=O)c3ccc(CN(C)Cc4ccccc4Cl)cc3)c2c1	CHEMBL3263730	0
CN(Cc1ccc(C(=O)NCCc2c[nH]c3ccccc23)cc1)Cc1cccc(Cl)c1	CHEMBL3263731	0
COc1ccc2[nH]cc(CCNC(=O)c3ccc(CN(C)Cc4cccc(Cl)c4)cc3)c2c1	CHEMBL3263732	0
COc1ccc2c(CCNC(=O)c3ccc(CN(C)Cc4cccc(Cl)c4)cc3)c[nH]c2c1	CHEMBL3263733	0
COc1ccccc1CN(C)Cc1ccc(C(=O)NCCc2c[nH]c3ccccc23)cc1	CHEMBL3263734	0
COc1ccc2[nH]cc(CCNC(=O)c3ccc(CN(C)Cc4ccccc4OC)cc3)c2c1	CHEMBL3263735	0
COc1cccc(CN(C)Cc2ccc(C(=O)NCCc3c[nH]c4ccccc34)cc2)c1	CHEMBL3263736	0
COc1cccc(CN(C)Cc2ccc(C(=O)NCCc3c[nH]c4ccc(OC)cc34)cc2)c1	CHEMBL3263737	0
O/N=C/c1cc[n+](CCC[n+]2ccc(/C=N/O)cc2)cc1	CHEMBL32778	0
CCOC(OCC)c1ccc(/C=C2\CCC/C(=C\c3ccc(C(OCC)OCC)cc3)C2=O)cc1	CHEMBL3289924	0
CCOC(OCC)c1ccc(/C=C2\COC/C(=C\c3ccc(C(OCC)OCC)cc3)C2=O)cc1	CHEMBL3289925	0
CCOC(OCC)c1ccc(/C=C2\CN(Cc3ccccc3)C/C(=C\c3ccc(C(OCC)OCC)cc3)C2=O)cc1	CHEMBL3289928	0
CCOC(OCC)c1ccc(/C=C/C(=O)/C=C/c2ccc(C(OCC)OCC)cc2)cc1	CHEMBL3289929	0
CCOC(OCC)c1ccc(/C=C2\CC/C(=C\c3ccc(C(OCC)OCC)cc3)C2=O)cc1	CHEMBL3289930	0
CCOC(OCC)c1ccc(/C=C/C(=O)C2=C(O)c3ccccc3CC2)cc1	CHEMBL3289933	0
CN(C)c1ccc(/C=C2/CCC/C(=C\c3ccc(N(C)C)cc3[N+](=O)[O-])C2=O)c([N+](=O)[O-])c1	CHEMBL3289934	0
CN(C)c1ccc(/C=C2/COC/C(=C\c3ccc(N(C)C)cc3[N+](=O)[O-])C2=O)c([N+](=O)[O-])c1	CHEMBL3289935	0
CN(C)c1ccc(/C=C2\CCc3ccccc3C2=O)c([N+](=O)[O-])c1	CHEMBL3289942	0
CN(C)c1ccc(/C=C/C(=O)C2=C(O)c3ccccc3CC2)cc1	CHEMBL3289943	0
O=C1/C(=C\c2ccc(N3CCCC3)cc2)CNC/C1=C\c1ccc(N2CCCC2)cc1	CHEMBL3290189	0
CN1C/C(=C/c2ccc(N3CCCC3)cc2)C(=O)/C(=C/c2ccc(N3CCCC3)cc2)C1	CHEMBL3290190	0
O=C1/C(=C/c2ccc(N3CCCC3)cc2)CC/C1=C\c1ccc(N2CCCC2)cc1	CHEMBL3290193	0
CC1(C)C[C@@H](c2ccccc2)C(CN2C(=O)c3ccccc3C2=O)=NO1	CHEMBL3310697	0
COC(=O)C(CC1=NO[C@@H]2CCC[C@@H]2[C@H]1c1ccccc1)C(=O)OC	CHEMBL3310699	0
CC(=O)N1OC(C)(C)CC(c2ccccc2)=C1CN1C(=O)c2ccccc2C1=O	CHEMBL3310703	0
COC(=O)C(CC1=C(c2ccc(OC)cc2)CC(C)(C)ON1C(C)=O)C(=O)OC	CHEMBL3310704	0
COC(=O)C(CC1=C(c2ccccc2)CC(C)(C)ON1C(C)=O)C(=O)OC	CHEMBL3310705	0
COC(=O)C(CC1=C(c2ccc(Cl)cc2)CC(C)(C)ON1C(C)=O)C(=O)OC	CHEMBL3310706	0
O=C(Cc1cc(=O)oc2cc(O)ccc12)NCCNc1c2c(nc3ccccc13)CCCC2	CHEMBL3322158	0
CCN(CC)CCCOc1ccc2nc3n(c(=O)c2c1)CCCc1ccccc1-3	CHEMBL3323049	0
O=c1c2cc(OCCCn3ccnc3)ccc2nc2n1CCCc1ccccc1-2	CHEMBL3323051	0
O=c1c2cc(OCCCN3CCCCC3)ccc2nc2n1CCC2	CHEMBL3323053	0
CCN(CC)CCCOc1ccc2nc3n(c(=O)c2c1)CCC3	CHEMBL3323056	0
CCN(CC)CCCOc1ccc2nc3n(c(=O)c2c1)CCCC3	CHEMBL3323062	0
CCN(CC)CCCOc1ccc2nc3n(c(=O)c2c1)CCCCC3	CHEMBL3323068	0
O=c1oc2cc(OCCCCN3CCC(Cc4ccccc4)CC3)ccc2c2ccccc12	CHEMBL3334506	0
CC(c1ccc2c(c1)oc(=O)c1ccccc12)N(C)C	CHEMBL3335017	0
C[C@@H](c1ccc2c(c1)oc(=O)c1ccccc12)N(C)C	CHEMBL3335018	0
COc1cc(C(C)N(C)C)cc2oc(=O)c3ccccc3c12	CHEMBL3335019	0
COc1cc(C(C)N(C)C)c2c(c1)oc(=O)c1ccccc12	CHEMBL3335020	0
CC(c1cc(O)c2c(c1)oc(=O)c1ccccc12)N(C)C	CHEMBL3335021	0
CC(c1cc(O)cc2oc(=O)c3ccccc3c12)N(C)C	CHEMBL3335022	0
CCN(C)C(=O)Oc1cc(C(C)N(C)C)cc2oc(=O)c3ccccc3c12	CHEMBL3335023	0
CN(CCOc1ccc2c3c(c(=O)oc2c1)CCCC3)Cc1ccccc1	CHEMBL3335025	0
COc1cccc(CN(C)CCOc2ccc3c4c(c(=O)oc3c2)CCCC4)c1	CHEMBL3335026	0
O=c1oc2cc(OCCN3CCC(Cc4ccccc4)CC3)ccc2c2c1CCCC2	CHEMBL3335027	0
COc1cccc(CC2CCN(CCOc3ccc4c5c(c(=O)oc4c3)CCCC5)CC2)c1	CHEMBL3335028	0
O=c1oc2cc(OCCN3CCN(Cc4ccccc4)CC3)ccc2c2c1CCCC2	CHEMBL3335029	0
COc1cccc(CN2CCN(CCOc3ccc4c5c(c(=O)oc4c3)CCCC5)CC2)c1	CHEMBL3335030	0
CN(CCCOc1ccc2c3c(c(=O)oc2c1)CCCC3)Cc1ccccc1	CHEMBL3335031	0
COc1cccc(CN(C)CCCOc2ccc3c4c(c(=O)oc3c2)CCCC4)c1	CHEMBL3335032	0
O=c1oc2cc(OCCCN3CCC(Cc4ccccc4)CC3)ccc2c2c1CCCC2	CHEMBL3335046	0
COc1cccc(CC2CCN(CCCOc3ccc4c5c(c(=O)oc4c3)CCCC5)CC2)c1	CHEMBL3335047	0
COc1cccc(CN2CCN(CCCOc3ccc4c5c(c(=O)oc4c3)CCCC5)CC2)c1	CHEMBL3335049	0
CN(CCCCOc1ccc2c3c(c(=O)oc2c1)CCCC3)Cc1ccccc1	CHEMBL3335050	0
COc1cccc(CN(C)CCCCOc2ccc3c4c(c(=O)oc3c2)CCCC4)c1	CHEMBL3335051	0
O=c1oc2cc(OCCCCN3CCC(Cc4ccccc4)CC3)ccc2c2c1CCCC2	CHEMBL3335052	0
COc1cccc(CC2CCN(CCCCOc3ccc4c5c(c(=O)oc4c3)CCCC5)CC2)c1	CHEMBL3335053	0
O=c1oc2cc(OCCCCN3CCN(Cc4ccccc4)CC3)ccc2c2c1CCCC2	CHEMBL3335054	0
COc1cccc(CN2CCN(CCCCOc3ccc4c5c(c(=O)oc4c3)CCCC5)CC2)c1	CHEMBL3335055	0
CN(CCOc1ccc2c(c1)oc(=O)c1ccccc12)Cc1ccccc1	CHEMBL3335056	0
COc1cccc(CN(C)CCOc2ccc3c(c2)oc(=O)c2ccccc23)c1	CHEMBL3335057	0
O=c1oc2cc(OCCN3CCC(Cc4ccccc4)CC3)ccc2c2ccccc12	CHEMBL3335058	0
COc1cccc(CC2CCN(CCOc3ccc4c(c3)oc(=O)c3ccccc34)CC2)c1	CHEMBL3335059	0
COc1cccc(CN2CCN(CCOc3ccc4c(c3)oc(=O)c3ccccc34)CC2)c1	CHEMBL3335061	0
CN(CCCOc1ccc2c(c1)oc(=O)c1ccccc12)Cc1ccccc1	CHEMBL3335062	0
COc1cccc(CN(C)CCCOc2ccc3c(c2)oc(=O)c2ccccc23)c1	CHEMBL3335063	0
O=c1oc2cc(OCCCN3CCC(Cc4ccccc4)CC3)ccc2c2ccccc12	CHEMBL3335064	0
COc1cccc(CC2CCN(CCCOc3ccc4c(c3)oc(=O)c3ccccc34)CC2)c1	CHEMBL3335065	0
COc1cccc(CN2CCN(CCCOc3ccc4c(c3)oc(=O)c3ccccc34)CC2)c1	CHEMBL3335067	0
CN(CCCCOc1ccc2c(c1)oc(=O)c1ccccc12)Cc1ccccc1	CHEMBL3335068	0
COc1cccc(CN(C)CCCCOc2ccc3c(c2)oc(=O)c2ccccc23)c1	CHEMBL3335069	0
COc1cccc(CC2CCN(CCCCOc3ccc4c(c3)oc(=O)c3ccccc34)CC2)c1	CHEMBL3335070	0
O=c1oc2cc(OCCCCN3CCN(Cc4ccccc4)CC3)ccc2c2ccccc12	CHEMBL3335071	0
COc1cccc(CN2CCN(CCCCOc3ccc4c(c3)oc(=O)c3ccccc34)CC2)c1	CHEMBL3335072	0
CCN(CC)CCOc1ccc(C(=O)/C=C/c2ccccc2)cc1	CHEMBL3337471	0
C/C=C1/[C@H]2C=C(C)C[C@]1(N[C@H]1OC(=O)C3=C4CC(C)(C)C[C@H]4[C@@H](C)[C@@H](O)C[C@]31O)c1ccc(=O)[nH]c1C2	CHEMBL3338387	0
CN(C)CCCOc1ccc(C(=O)/C=C/c2ccccc2)cc1	CHEMBL3338991	0
CN(C)CCCCOc1ccc(C(=O)/C=C/c2ccccc2)cc1	CHEMBL3338992	0
CN(C)CCCCCOc1ccc(C(=O)/C=C/c2ccccc2)cc1	CHEMBL3338993	0
CN(C)CCCCCCOc1ccc(C(=O)/C=C/c2ccccc2)cc1	CHEMBL3338994	0
CCN(CC)CCCOc1ccc(C(=O)/C=C/c2ccccc2)cc1	CHEMBL3338995	0
CCN(CC)CCCCOc1ccc(C(=O)/C=C/c2ccccc2)cc1	CHEMBL3338996	0
CCN(CC)CCCCCOc1ccc(C(=O)/C=C/c2ccccc2)cc1	CHEMBL3338997	0
CCN(CC)CCCCCCOc1ccc(C(=O)/C=C/c2ccccc2)cc1	CHEMBL3338998	0
CCCN(CCC)CCOc1ccc(C(=O)/C=C/c2ccccc2)cc1	CHEMBL3338999	0
CCCN(CCC)CCCOc1ccc(C(=O)/C=C/c2ccccc2)cc1	CHEMBL3339000	0
CCCN(CCC)CCCCOc1ccc(C(=O)/C=C/c2ccccc2)cc1	CHEMBL3339001	0
CCCN(CCC)CCCCCOc1ccc(C(=O)/C=C/c2ccccc2)cc1	CHEMBL3339002	0
CCCN(CCC)CCCCCCOc1ccc(C(=O)/C=C/c2ccccc2)cc1	CHEMBL3339003	0
CCCCN(CCCC)CCOc1ccc(C(=O)/C=C/c2ccccc2)cc1	CHEMBL3339004	0
CCCCN(CCCC)CCCOc1ccc(C(=O)/C=C/c2ccccc2)cc1	CHEMBL3339005	0
CCCCN(CCCC)CCCCOc1ccc(C(=O)/C=C/c2ccccc2)cc1	CHEMBL3339006	0
CCCCN(CCCC)CCCCCOc1ccc(C(=O)/C=C/c2ccccc2)cc1	CHEMBL3339007	0
CCCCN(CCCC)CCCCCCOc1ccc(C(=O)/C=C/c2ccccc2)cc1	CHEMBL3339008	0
CNc1ccccc1-c1nc(C(=O)OC)cs1	CHEMBL3353566	0
CNc1ccccc1-c1nc(C(N)=O)cs1	CHEMBL3353567	0
CNc1ccccc1-c1nc(C(=O)O)cs1	CHEMBL3353568	0
C/C=C1/[C@@H]2Cc3[nH]c(=O)ccc3[C@@]1(N)C[C@]1(C)O[C@H]21	CHEMBL3355594	0
COc1ccc2nc3c(c(NCCNC4=CC(=O)c5ccccc5C4=O)c2c1)CCCC3	CHEMBL3356528	0
COc1ccc2nc3c(c(NCCCNC4=CC(=O)c5ccccc5C4=O)c2c1)CCCC3	CHEMBL3356529	0
COc1ccc2nc3c(c(NCCNC4=C(Cl)C(=O)c5ccccc5C4=O)c2c1)CCCC3	CHEMBL3356540	0
COc1cc2c(cc1OC)C(c1ccccc1)N(CCCCCn1ccnc1/C=N/O)CC2	CHEMBL3360486	0
COc1cc2c(cc1OC)C(c1ccccc1)N(CCCCCCn1ccnc1/C=N/O)CC2	CHEMBL3360487	0
COC(=O)CC1=NO[C@@H]2CCCC[C@@H]2[C@H]1c1ccccc1	CHEMBL3360757	0
COC(=O)CC1=NO[C@@H]2[C@H]3CC[C@H](C3)[C@@H]2[C@H]1c1ccccc1	CHEMBL3360758	0
c1ccc(COC[C@H]2NC[C@H](OCc3ccccc3)[C@@H](OCc3ccccc3)[C@@H]2OCc2ccccc2)cc1	CHEMBL3393673	0
C=CC[C@@H]1[C@H](O)[C@@H](OCc2ccccc2)[C@H](O)CN1CCCCCCCC	CHEMBL3393674	0
O=C1N[C@H](COCc2ccccc2)[C@@H](OCc2ccccc2)[C@H](OCc2ccccc2)[C@H]1OCc1ccccc1	CHEMBL3393675	0
CN(CCCCCCN1C(=O)c2ccccc2C1=O)Cc1ccccc1	CHEMBL3402708	0
CN(CCCCCCN1C(=O)c2ccccc2C1=O)Cc1ccccc1F	CHEMBL3402713	0
CN(CCCCCCN1C(=O)c2ccccc2C1=O)Cc1cccc(Cl)c1	CHEMBL3402718	0
CN(CCCCCCCN1C(=O)c2ccccc2C1=O)Cc1cccc(Cl)c1	CHEMBL3402719	0
CN(CCCCCCCCN1C(=O)c2ccccc2C1=O)Cc1cccc(Cl)c1	CHEMBL3402720	0
C#CCN(C)Cc1cc2cc(OCCCC3CCN(Cc4ccccc4C)CC3)ccc2n1C	CHEMBL3407581	0
C#CCN(C)Cc1cc2cc(OCCCC3CCN(Cc4ccc(OC(=O)N(C)C)c5ncccc45)CC3)ccc2n1C	CHEMBL3407582	0
C#CCN(C)Cc1cc2cc(OCCCC3CCN(Cc4ccccc4)CC3)ccc2[nH]1	CHEMBL3407583	0
C#CCNCc1cc2cc(OCCCC3CCN(Cc4ccccc4)CC3)ccc2[nH]1	CHEMBL3407584	0
C=CCNCc1cc2cc(OCCCC3CCN(Cc4ccccc4)CC3)ccc2[nH]1	CHEMBL3407585	0
CCOC(=O)c1cc2cc(OCCCC3CCN(Cc4ccccc4)CC3)ccc2[nH]1	CHEMBL3407586	0
OCc1cc2cc(OCCCC3CCN(Cc4ccccc4)CC3)ccc2[nH]1	CHEMBL3407587	0
COc1ccc2c3c([nH]c2c1)C(C)=NCC3	CHEMBL340807	0
O=C1c2ccccc2C(=O)N1CCCCCCNCc1ccccc1	CHEMBL3415559	0
O=C1c2ccccc2C(=O)N1CCCCCCNCc1ccc(F)cc1	CHEMBL3415569	0
O=C1c2ccccc2C(=O)N1CCCCCCNCc1ccc(F)cc1F	CHEMBL3415574	0
O=C1c2ccccc2C(=O)N1CCCCCCNCc1cccc(Cl)c1	CHEMBL3415579	0
COc1cc(N)c(Cl)cc1C(O)CCC1CCN(CC2CCCCC2)CC1	CHEMBL3417006	0
COc1cc(N)c(Cl)cc1C(=O)OCC1CCN(CC2CCCCC2)CC1	CHEMBL3417008	0
C=CC(=O)N1C/C(=C\c2ccc(F)cc2)C(=O)/C(=C/c2ccc(F)cc2)C1	CHEMBL350032	0
C#CCN(C)C(C)Cc1cccc(OC(=O)N(C)CCCCCC)c1	CHEMBL356385	0
CCN(CCCCOc1ccc(-c2cc(=O)c3c(OC)c(OC)c(OC)cc3o2)cc1)Cc1ccccc1	CHEMBL3577509	0
CCN(CCCCCCOc1ccc(-c2cc(=O)c3c(O)c(OC)c(OC)cc3o2)cc1)Cc1ccccc1OC	CHEMBL3577524	0
CCC(C)C(=O)[C@]12C(=O)[C@]3(CC=C(C)C)C[C@H](CC=C(C)C)[C@@]1(C)CC[C@@H](C(C)(C)O)OC2=C(CC=C(C)C)C3=O	CHEMBL3581572	0
C=C(C)[C@H]1CC[C@@](C)(O)[C@@H](C2C(=O)C(=C(O)C(C)C)C(=O)C(CC=C(C)C)(CC=C(C)C)C2=O)C1	CHEMBL3581573	0
CC(C)=CC[C@]12C[C@@H]3[C@@H]4[C@@H](O)C(C)(C)[C@@H](C(C)C)CC4(C1=O)C(=O)[C@](C(=O)c1ccccc1)(C2=O)C3(C)C	CHEMBL3581576	0
C/C(=C/C[C@]12C[C@H]3C[C@@H]4C(C)(C)CC[C@@]4(C1=O)C(=O)[C@](C(=O)c1ccccc1)(C2=O)C3(C)C)CC/C=C/C(C)C	CHEMBL3581580	0
CN1CCN(c2cccc(-c3cnc4[nH]c5cnc(C#N)cc5c4c3)c2)CC1	CHEMBL3582200	0
C[C@H]1C[C@@H](C)CN(Cc2ccc(-c3cnc4[nH]c5cnc(C#N)cc5c4c3)cc2)C1	CHEMBL3582203	0
CC1(C)CCCN(Cc2ccc(-c3cnc4[nH]c5cnc(C#N)cc5c4c3)cc2)C1	CHEMBL3582204	0
N#Cc1cc2c(cn1)[nH]c1ncc(-c3ccc(CN4CCC(C#N)CC4)cc3)cc12	CHEMBL3582210	0
N#Cc1cc2c(cn1)[nH]c1ncc(-c3ccc(CN4CCOCC4)cc3)cc12	CHEMBL3582211	0
N#Cc1cc2c(cn1)[nH]c1ncc(-c3ccc(CN4CCC5(CC4)COC5)cc3)cc12	CHEMBL3582212	0
c1cnc(-c2cc3c(cn2)[nH]c2ncc(-c4ccc(CN5CCCCC5)cc4)cc23)cn1	CHEMBL3582230	0
c1cc(-c2cc3c(cn2)[nH]c2ncc(-c4ccc(CN5CCCCC5)cc4)cc23)cnn1	CHEMBL3582231	0
Cc1c(C)c2ccc(OCCCN(C)Cc3ccccc3)cc2oc1=O	CHEMBL3586574	0
Cc1cc(=O)oc2cc(OCc3ccc(CN(C)Cc4cccc(Cl)c4)cc3)ccc12	CHEMBL3586600	0
CN(Cc1ccc(C#N)cc1)Cc1ccc(COc2ccc3ccc(=O)oc3c2)cc1	CHEMBL3586602	0
Cc1cc(=O)oc2cc(OCc3ccc(CN(C)Cc4ccc(C#N)cc4)cc3)ccc12	CHEMBL3586604	0
Cc1c(C)c2ccc(OCc3ccc(CN(C)Cc4ccc(C#N)cc4)cc3)cc2oc1=O	CHEMBL3586605	0
CN(Cc1ccccc1)Cc1ccc(COc2ccc3ccc(=O)[nH]c3c2)cc1	CHEMBL3586614	0
COC(=O)C1=C(Nc2ccccc2)C[C@@H](c2cccc([N+](=O)[O-])c2)N(c2ccccc2)[C@@H]1c1cccc([N+](=O)[O-])c1	CHEMBL3597067	0
CN(Cc1ccccc1)Cc1ccc(/C=C2\CCc3cc(OCCCCCN4CCN(Cc5ccc(F)cc5)CC4)ccc3C2=O)cc1	CHEMBL3597556	0
O=C(C[n+]1ccc(/C=N/O)cc1)Nc1nccs1	CHEMBL3597939	0
O=C(C[n+]1ccc(/C=N/O)cc1)Nc1nc(-c2ccccc2)cs1	CHEMBL3597941	0
Cc1ccc(-c2csc(NC(=O)C[n+]3ccc(/C=N/O)cc3)n2)cc1	CHEMBL3597942	0
COc1ccc(-c2csc(NC(=O)C[n+]3ccc(/C=N/O)cc3)n2)cc1	CHEMBL3597944	0
CCOC(=O)Cc1csc(NC(=O)C[n+]2ccc(/C=N/O)cc2)n1	CHEMBL3597946	0
CCOC(=O)c1csc(NC(=O)C[n+]2ccc(/C=N/O)cc2)n1	CHEMBL3597948	0
CN(C)CCC[C@@]1(c2ccc(F)cc2)OCc2cc(-c3nnc(-c4ccccc4N)[nH]3)ccc21	CHEMBL3605309	0
CN(C)CCC[C@@]1(c2ccc(F)cc2)OCc2cc(-c3nnc(-c4ccc(O)cc4)[nH]3)ccc21	CHEMBL3605314	0
CN(C)CCC[C@@]1(c2ccc(F)cc2)OCc2cc(-c3nnc(-c4cccc([N+](=O)[O-])c4)[nH]3)ccc21	CHEMBL3605316	0
Cc1ccccc1-c1nnc(-c2ccc3c(c2)CO[C@@]3(CCCN(C)C)c2ccc(F)cc2)[nH]1	CHEMBL3605418	0
Cc1cccc(-c2nnc(-c3ccc4c(c3)CO[C@@]4(CCCN(C)C)c3ccc(F)cc3)[nH]2)c1	CHEMBL3605419	0
CN(C)CCC[C@@]1(c2ccc(F)cc2)OCc2cc(-c3nnc(-c4cccc(Cl)c4)[nH]3)ccc21	CHEMBL3605422	0
CN(C)CCC[C@@]1(c2ccc(F)cc2)OCc2cc(-c3nnc(-c4ccc(Cl)cc4)[nH]3)ccc21	CHEMBL3605423	0
CN(C)CCC[C@@]1(c2ccc(F)cc2)OCc2cc(-c3nnc(-c4ccccc4F)[nH]3)ccc21	CHEMBL3605424	0
CN(C)CCC[C@@]1(c2ccc(F)cc2)OCc2cc(-c3nnc(-c4ccc(F)cc4)[nH]3)ccc21	CHEMBL3605426	0
CN(C)CCC[C@@]1(c2ccc(F)cc2)OCc2cc(-c3nnc(-c4ccccc4I)[nH]3)ccc21	CHEMBL3605430	0
COc1ccccc1-c1nnc(-c2ccc3c(c2)CO[C@@]3(CCCN(C)C)c2ccc(F)cc2)[nH]1	CHEMBL3605433	0
COc1cccc(-c2nnc(-c3ccc4c(c3)CO[C@@]4(CCCN(C)C)c3ccc(F)cc3)[nH]2)c1	CHEMBL3605434	0
CN(C)CCC[C@@]1(c2ccc(F)cc2)OCc2cc(-c3nnc(-c4ccc(-c5nn[nH]n5)cc4)[nH]3)ccc21	CHEMBL3605437	0
CC[N+]1(Cc2ccccc2[N+](=O)[O-])CCCCCn2c(C)c3c(=O)n(c2=O)CCCCC[N+](CC)(Cc2ccccc2[N+](=O)[O-])CCCCCn2c(C)c(c(=O)n(c2=O)CCCCC1)C3	CHEMBL3621335	0
CC(C)Cn1cc(C(=O)C(F)F)cn1	CHEMBL3623560	0
CCC(C)n1cc(C(=O)CF)cn1	CHEMBL3623563	0
CCCC(C)n1cc(C(=O)CF)cn1	CHEMBL3623564	0
CCC(CC)n1cc(C(=O)CF)cn1	CHEMBL3623565	0
O=C(CF)c1cnn(C2CCCC2)c1	CHEMBL3623566	0
O=C(NCCc1c[nH]c2ccccc12)c1ccc[n+](Cc2ccccc2)c1	CHEMBL3628053	0
O=C(NCCc1c[nH]c2ccccc12)c1ccc[n+](Cc2ccccc2F)c1	CHEMBL3628054	0
O=C(NCCc1c[nH]c2ccccc12)c1cc[n+](Cc2ccccc2)cc1	CHEMBL3628055	0
O=C(NCCc1c[nH]c2ccccc12)c1cc[n+](Cc2ccccc2F)cc1	CHEMBL3628056	0
O=C(NCCc1c[nH]c2ccccc12)c1cc[n+](Cc2cccc(F)c2)cc1	CHEMBL3628057	0
O=C(NCCc1c[nH]c2ccccc12)c1cc[n+](Cc2ccc(F)cc2)cc1	CHEMBL3628058	0
Cc1cccc(C[n+]2ccc(C(=O)NCCc3c[nH]c4ccccc34)cc2)c1	CHEMBL3628059	0
Cc1ccc(C[n+]2ccc(C(=O)NCCc3c[nH]c4ccccc34)cc2)cc1	CHEMBL3628060	0
N#Cc1ccc(C[n+]2ccc(C(=O)NCCc3c[nH]c4ccccc34)cc2)cc1	CHEMBL3628061	0
COc1ccc2[nH]cc(CCNC(=O)c3cc[n+](Cc4ccccc4F)cc3)c2c1	CHEMBL3628062	0
COc1ccc2[nH]cc(CCNC(=O)c3cc[n+](Cc4cccc(F)c4)cc3)c2c1	CHEMBL3628063	0
COc1ccc2[nH]cc(CCNC(=O)c3cc[n+](Cc4ccc(F)cc4)cc3)c2c1	CHEMBL3628064	0
COc1ccc2[nH]cc(CCNC(=O)c3cc[n+](Cc4ccc(OC(=O)N(C)C)cc4)cc3)c2c1	CHEMBL3628065	0
COc1ccc2nc3c(c(NCCCCNC(=O)C4(C)CCc5c(C)c(O)c(C)c(C)c5O4)c2c1)CCCC3	CHEMBL3632626	0
COc1ccc2nc3c(c(NCCNC(=O)C4(C)CCc5c(C)c(O)c(C)c(C)c5O4)c2c1)CCCC3	CHEMBL3632846	0
COc1ccc2nc3c(c(NCCCNC(=O)C4(C)CCc5c(C)c(O)c(C)c(C)c5O4)c2c1)CCCC3	CHEMBL3632847	0
COc1ccc2nc3c(c(NCCCCCNC(=O)C4(C)CCc5c(C)c(O)c(C)c(C)c5O4)c2c1)CCCC3	CHEMBL3632848	0
COc1ccc2nc3c(c(NCCCCCCNC(=O)C4(C)CCc5c(C)c(O)c(C)c(C)c5O4)c2c1)CCCC3	CHEMBL3632849	0
COc1ccc2nc3c(c(NCCCCCCCNC(=O)C4(C)CCc5c(C)c(O)c(C)c(C)c5O4)c2c1)CCCC3	CHEMBL3632850	0
COc1ccc2nc3c(c(NCCCCCCCCNC(=O)C4(C)CCc5c(C)c(O)c(C)c(C)c5O4)c2c1)CCCC3	CHEMBL3632851	0
COc1ccc(-c2cc3c(c(=O)o2)C[C@H]2[C@@](C)(CC[C@@]4(O)C(C)(C)C(=O)CC[C@]24C)O3)cc1	CHEMBL3632852	0
COc1ccc(-c2cc3c(c(=O)o2)C[C@]2(O)[C@@]4(C)CC[C@@H](OC(C)=O)C(C)(C)[C@]4(O)CC[C@@]2(C)O3)cc1	CHEMBL3632853	0
Nc1c2c(nc3cc(Cl)ccc13)CC(CNC(=O)CCCCC1CCSS1)CC2	CHEMBL363391	0
CNC(=O)Oc1cccc(CN(C)CCCCCCCOc2ccc3c(c2)OC/C(=C\c2cc(OC)c(OC)c(OC)c2)C3=O)c1	CHEMBL363588	0
CC(=O)NCCc1c[nH]c2ccc(OC(=O)NCCNc3c4c(nc5ccccc35)CCCC4)cc12	CHEMBL3642041	0
CC(=O)NCCc1c[nH]c2ccc(OC(=O)NCCNc3c4c(nc5ccc(Cl)cc35)CCCC4)cc12	CHEMBL3642051	0
CNC(=O)Oc1cccc(CN(C)CCCCCCCOc2ccc3c(c2)O/C(=C\c2cccc4ccccc24)C3=O)c1	CHEMBL364545	0
CNC(=O)Oc1cccc(CN(C)CCCCCCCOc2ccc3c(c2)O/C(=C\c2cc(Cl)cc(Cl)c2)C3=O)c1	CHEMBL364678	0
CNC(=O)Oc1cccc(CN(C)CCCCCCCOc2ccc3c(c2)CC/C(=C\c2cc(OC)c(OC)c(OC)c2)C3=O)c1	CHEMBL365136	0
CCC(=O)Oc1cccc(CN(C)CCCCCCCOc2ccc3c(c2)O/C(=C\c2ccc4ccccc4c2)C3=O)c1	CHEMBL365678	0
CNC(=O)Oc1cccc(CN(C)CCCCCCCOc2ccc3c(c2)O/C(=C\c2ccccc2)C3=O)c1	CHEMBL370961	0
CC(NC(=O)Oc1cccc2c1OCC1CCN(C)C21)c1ccccc1	CHEMBL371787	0
CN(CCCCCCCOc1ccc2c(c1)O/C(=C\c1cccc3ccccc13)C2=O)Cc1cccc(O)c1	CHEMBL371798	0
CCOP1(=O)CCCC(C(=O)OC)=C(C)O1	CHEMBL3735042	0
COP1(=O)OCCC(C(=O)OC(C)(C)C)=C(C)O1	CHEMBL3735606	0
COC(=O)C1=C(C)OP(=O)(OC)OCC1	CHEMBL3736339	0
Cn1c2ccc(O)cc2c2cc[n+](C)cc21	CHEMBL373651	0
CC(C)=CCC/C(C)=C/Cc1c(O)cc2c(c1O)C(=O)C[C@@H](c1ccc(O)cc1)O2	CHEMBL374130	0
COc1ccc2c(c1)c1ccnc(C)c1n2C	CHEMBL375077	0
CCN(CCCCCCCCc1cccc(OC)c1)Cc1ccccc1OC	CHEMBL3752227	0
CCNCc1cccc2[nH]c3cc(Cl)ccc3c12	CHEMBL3752232	0
ICC1CN=C(Nc2ccccn2)S1	CHEMBL3752908	0
CC(C)NCc1cccc2[nH]c3ccccc3c12	CHEMBL3752974	0
COc1cccc2cc(C(=O)NCCCCCCNc3c4c(nc5ccccc35)CCC4)oc12	CHEMBL3753508	0
c1ccc2oc(CN(CCCCCCNc3c4c(nc5ccccc35)CCC4)Cc3cc4ccccc4o3)cc2c1	CHEMBL3754341	0
CCN(Cc1cccc2[nH]c3cc(Cl)ccc3c12)C(=O)/C=C/c1ccc(O)c(OC)c1	CHEMBL3754448	0
BrCC1CN=C(Nc2ccccn2)S1	CHEMBL3754585	0
COc1cc(/C=C/C(=O)N(Cc2cccc3[nH]c4ccccc4c23)C(C)C)ccc1O	CHEMBL3754631	0
COc1cccc2cc(CN(CCCCCCNc3c4c(nc5ccccc35)CCC4)Cc3cc4cccc(OC)c4o3)oc12	CHEMBL3754694	0
COc1cccc2cc(CN(CCCCCCNc3c4c(nc5ccccc35)CCCCC4)Cc3cc4cccc(OC)c4o3)oc12	CHEMBL3754778	0
CCC(C)C(=O)C1=C(O)[C@]2(CC=C(C)C)OC(=O)[C@](CC=C(C)C)(C[C@H](CC=C(C)C)[C@@]1(C)C/C=C/C(C)(C)O)C2=O	CHEMBL3758282	0
CC[C@H]1O[C@@H]2O[C@H](/C=C/C=C/C=C/c3oc(=O)cc(OC/C=C(\C)C(=O)OC)c3C)[C@H](O)[C@]2(C)[C@@]1(C)O	CHEMBL3759013	0
CC(C)=CC[C@H]1C[C@@]2(CC=C(C)C)C(=O)O[C@](CC=C(C)C)(C2=O)C(O)=C(C(=O)C(C)C)[C@]1(C)C/C=C/C(C)(C)O	CHEMBL3759090	0
CN(CCCCCCCOc1ccc2c(=O)c3ccccc3oc2c1)Cc1cccc(Cl)c1	CHEMBL375976	0
COc1ccccc1CN(C)CCCCCCCOc1ccc2c(=O)c3ccccc3oc2c1	CHEMBL376186	0
N#CC1C(=N)N2CCCN=C2C([N+](=O)[O-])C12C(=O)Nc1ccccc12	CHEMBL3763203	0
CC1(C)CN=C2C([N+](=O)[O-])C3(C(=O)Nc4ccc(F)cc43)C(C#N)C(=N)N2C1	CHEMBL3763232	0
N#CC1C(=N)N(Cc2ccccc2)C(=NCc2ccccc2)C([N+](=O)[O-])C12C(=O)c1cccc3cccc2c13	CHEMBL3763417	0
Cc1ccc2c(c1)C1(C(=O)N2)C(C#N)C(=N)N(Cc2ccccc2)C(=NCc2ccccc2)C1[N+](=O)[O-]	CHEMBL3763482	0
O=c1oc2cc(OCCNC3CCN(Cc4ccccc4)CC3)ccc2c2c1CCCC2	CHEMBL3763535	0
N#CC1C(=N)N2CCN=C2C([N+](=O)[O-])C12C(=O)Nc1ccc(F)cc12	CHEMBL3763609	0
CC1(C)CN=C2C([N+](=O)[O-])C3(C(=O)Nc4ccccc43)C(C#N)C(=N)N2C1	CHEMBL3763778	0
CC1(C)CN=C2C([N+](=O)[O-])C3(C(=O)Nc4ccc([N+](=O)[O-])cc43)C(C#N)C(=N)N2C1	CHEMBL3763820	0
CC1(C)CN=C2C([N+](=O)[O-])C3(C(=O)c4ccc(Br)c5c(Br)ccc3c45)C(C#N)C(=N)N2C1	CHEMBL3763832	0
N#CC1C(=N)N(Cc2ccccc2)C(=NCc2ccccc2)C([N+](=O)[O-])C12C(=O)Nc1ccc(F)cc12	CHEMBL3763973	0
N#CC1C(=N)N2CCN=C2C([N+](=O)[O-])C12C(=O)c1ccc(Br)c3c(Br)ccc2c13	CHEMBL3764065	0
COc1ccc2[nH]c3c[n+](C)ccc3c2c1	CHEMBL376434	0
N#CC1C(=N)N2CCN=C2C([N+](=O)[O-])C12C(=O)c1cccc3cccc2c13	CHEMBL3764433	0
N#CC1C(=N)N2CCCN=C2C([N+](=O)[O-])C12C(=O)c1ccc(Br)c3c(Br)ccc2c13	CHEMBL3764488	0
Cc1c(C)c2ccc(OCCNC3CCN(Cc4ccccc4)CC3)cc2oc1=O	CHEMBL3764609	0
Cc1ccc2c(c1)C1(C(=O)N2)C(C#N)C(=N)N2CCN=C2C1[N+](=O)[O-]	CHEMBL3764679	0
CC1(C)CN=C2C([N+](=O)[O-])C3(C(=O)c4cccc5cccc3c45)C(C#N)C(=N)N2C1	CHEMBL3764714	0
Cc1c(Cl)c(=O)oc2cc(OCCNC3CCN(Cc4ccccc4)CC3)ccc12	CHEMBL3764762	0
N#CC1C(=N)N2CCCN=C2C([N+](=O)[O-])C12C(=O)c1cccc3cccc2c13	CHEMBL3764900	0
Cc1ccc2c(c1)C1(C(=O)N2)C(C#N)C(=N)N2CC(C)(C)CN=C2C1[N+](=O)[O-]	CHEMBL3765093	0
N#CC1C(=N)N(Cc2ccccc2)C(=NCc2ccccc2)C([N+](=O)[O-])C12C(=O)c1ccc(Br)c3c(Br)ccc2c13	CHEMBL3765098	0
N#CC1C(=N)N2CCN=C2C([N+](=O)[O-])C12C(=O)Nc1ccccc12	CHEMBL3765162	0
O=c1cc(Cl)c2ccc(OCCNC3CCN(Cc4ccccc4)CC3)cc2o1	CHEMBL3765293	0
N#CC1C(=N)N(Cc2ccccc2)C(=NCc2ccccc2)C([N+](=O)[O-])C12C(=O)Nc1ccc([N+](=O)[O-])cc12	CHEMBL3765476	0
N#CC1C(=N)N(Cc2ccccc2)C(=NCc2ccccc2)C([N+](=O)[O-])C12C(=O)Nc1ccccc12	CHEMBL3765496	0
N#CC1C(=N)N2CCN=C2C([N+](=O)[O-])C12C(=O)Nc1ccc([N+](=O)[O-])cc12	CHEMBL3765569	0
N#CC1C(=N)N2CCCN=C2C([N+](=O)[O-])C12C(=O)Nc1ccc([N+](=O)[O-])cc12	CHEMBL3765697	0
COc1cccc(C(=O)N2c3ccccc3[Se]c3ccc(Cl)cc32)c1	CHEMBL3769537	0
COc1ccc(C(=O)N2c3ccccc3[Se]c3ccc(Cl)cc32)cc1OC	CHEMBL3769555	0
COc1ccc(C(=O)N2c3ccccc3[Se]c3ccccc32)cc1	CHEMBL3769576	0
O=C(Cc1ccccc1)N1c2ccccc2[Se]c2ccccc21	CHEMBL3769811	0
COc1cccc(C(=O)N2c3ccccc3[Se]c3ccccc32)c1	CHEMBL3769833	0
c1ccc2c(c1)Nc1ccccc1[Se]2	CHEMBL3769834	0
Clc1ccc2c(c1)Nc1ccccc1[Se]2	CHEMBL3769862	0
COc1ccc(C(=O)N2c3ccccc3Sc3ccc(Cl)cc32)cc1OC	CHEMBL3770071	0
COc1ccc(C(=O)N2c3ccccc3[Se]c3ccc(Cl)cc32)cc1	CHEMBL3770203	0
COc1cccc(C(=O)N2c3ccccc3Sc3ccc(Cl)cc32)c1	CHEMBL3770206	0
COc1ccc(C(=O)N2c3ccccc3Sc3ccccc32)cc1OC	CHEMBL3770356	0
O=C(c1ccccc1)N1c2ccccc2[Se]c2ccc(Cl)cc21	CHEMBL3770479	0
O=C(Cc1ccccc1)N1c2ccccc2Sc2ccc(Cl)cc21	CHEMBL3770516	0
O=C(c1ccccc1)N1c2ccccc2[Se]c2ccccc21	CHEMBL3770569	0
O=C(CCc1ccccc1)N1c2ccccc2[Se]c2ccc(Cl)cc21	CHEMBL3770577	0
O=C(Cc1ccccc1)N1c2ccccc2[Se]c2ccc(Cl)cc21	CHEMBL3770803	0
O=C(CCc1ccccc1)N1c2ccccc2Sc2ccc(Cl)cc21	CHEMBL3770866	0
COc1ccc(C(=O)N2c3ccccc3[Se]c3ccccc32)cc1OC	CHEMBL3770978	0
O=C(CCc1ccccc1)N1c2ccccc2[Se]c2ccccc21	CHEMBL3771233	0
COc1nc(Oc2ccc(C(=O)OCC(C)N(C)C)cc2)nc(Oc2ccc(C(=O)OCC(C)N(C)C)cc2)n1	CHEMBL3780131	0
CC(COC(=O)c1ccc(Oc2nc(Oc3ccc(C(=O)OCC(C)N(C)C)cc3)nc(Oc3ccc(C(=O)OCC(C)N(C)C)cc3)n2)cc1)N(C)C	CHEMBL3780448	0
COc1ccc(C2N(C)Cc3cc(O)ccc3N2C)cc1	CHEMBL3785187	0
COc1ccccc1C1N(C)Cc2cc(O)ccc2N1C	CHEMBL3785229	0
CN1Cc2cc(O)ccc2N(C)C1c1cccc2ccccc12	CHEMBL3785481	0
CN1Cc2cc(O)ccc2N(C)C1c1ccoc1	CHEMBL3785526	0
CN1Cc2cc(O)ccc2N(C)C1c1ccc(Cl)cc1	CHEMBL3785644	0
Cc1ccccc1C1N(C)Cc2cc(O)ccc2N1C	CHEMBL3785803	0
CN1Cc2cc(O)ccc2N(C)C1c1ccccc1	CHEMBL3785808	0
Cc1cccc(C2N(C)Cc3cc(O)ccc3N2C)c1	CHEMBL3786323	0
CN1Cc2cc(O)ccc2N(C)C1c1ccncc1	CHEMBL3786447	0
CN1Cc2cc(O)ccc2N(C)C1c1cccc(Cl)c1	CHEMBL3786505	0
CCCN1Cc2cc(O)ccc2N(C)C1c1ccccc1	CHEMBL3786544	0
Cc1ccc(C2N(C)Cc3cc(O)ccc3N2C)cc1	CHEMBL3786589	0
CN1Cc2cc(O)ccc2N(C)C1c1cc[nH]c1	CHEMBL3786655	0
CN1Cc2cc(O)ccc2N(C)C1c1c(Cl)cccc1Cl	CHEMBL3786666	0
CN1Cc2cc(O)ccc2N(C)C1c1cccs1	CHEMBL3786843	0
CCCCCCCNC(=O)Oc1ccc2c(c1)CN(C)C(c1ccc(F)cc1)N2C	CHEMBL3787116	0
CC(C)N1Cc2cc(O)ccc2N(C)C1c1ccccc1	CHEMBL3787307	0
CN1Cc2cc(O)ccc2N(C)C1c1ccc(F)cc1	CHEMBL3787666	0
COc1cc2occ(-c3ccc(O)cc3O)c(=O)c2c(O)c1CC=C(C)C	CHEMBL3809337	0
Cc1ccccc1NC(=O)Oc1ccc2c(c1)[C@@]1(C)CCN(C)[C@H]1N2C	CHEMBL381782	0
O=C(/C=C/c1ccccc1O)NCCC1CCN(Cc2ccccc2)CC1	CHEMBL3817981	0
COc1ccc(/C=C/C(=O)NCCC2CCN(Cc3ccccc3)CC2)cc1O	CHEMBL3818086	0
COc1cccc2c1=C(O)/C(=C/C1CCN(Cc3ccccc3)CC1)C=2	CHEMBL3818167	0
COc1cc(CCC(=O)NCCC2CCN(Cc3ccccc3)CC2)ccc1O	CHEMBL3818250	0
O=C(/C=C/c1ccc(F)cc1)NCCC1CCN(Cc2ccccc2)CC1	CHEMBL3818332	0
O=C(CCCCCCCCc1ccc(O)c(O)c1)c1c(O)ccc(C(CCCCCCCCc2ccc(O)c(O)c2)c2c(O)cccc2O)c1O	CHEMBL3818374	0
COc1cc2c(cc1O)=C(O)/C(=C/C1CCN(Cc3ccccc3)CC1)C=2	CHEMBL3818415	0
COc1cccc2c1=C(O)/C(=C/C1CCN(Cc3ccc4c(c3)OCO4)CC1)C=2	CHEMBL3818918	0
O=C(/C=C/c1ccc(O)c(O)c1)NCCC1CCN(Cc2ccccc2)CC1	CHEMBL3818992	0
O=C(CCCCCCCCc1ccc(O)c(O)c1)c1c(O)ccc(C(CCCCCCCCc2ccc(O)cc2)c2c(O)cccc2O)c1O	CHEMBL3819024	0
O=C(CCCCCCCCc1ccc(O)cc1)c1c(O)cc(O)cc1O	CHEMBL3819036	0
COc1cc2c(cc1O)=C/C(=C\C1CCN(Cc3ccccc3)CC1)C=2O	CHEMBL3819155	0
COc1ccc2c(c1)=C(O)/C(=C/C1CCN(Cc3ccc4c(c3)OCO4)CC1)C=2	CHEMBL3819247	0
O=C(/C=C/c1ccc(O)cc1)NCCC1CCN(Cc2ccccc2)CC1	CHEMBL3819320	0
COc1cccc(CN2CCC(/C=C3\C=c4cccc(OC)c4=C3O)CC2)c1	CHEMBL3819574	0
CC(C)c1ccc(NC(=O)Oc2ccc3c(c2)[C@]2(C)CCO[C@@H]2N3C)cc1	CHEMBL382207	0
O=C(CC1CCN(Cc2ccccc2)CC1)NCCc1c[nH]c2ccccc12	CHEMBL3822559	0
Cc1ccc(CN2CCC(CC(=O)NCCc3c[nH]c4ccccc34)CC2)cc1	CHEMBL3822670	0
COc1ccc2[nH]cc(CCNC(=O)CC3CCN(Cc4ccc(C)cc4)CC3)c2c1	CHEMBL3822790	0
Cc1ccccc1CN1CCC(C(=O)NCCc2c[nH]c3ccccc23)CC1	CHEMBL3822890	0
O=C(CCc1c[nH]c2ccccc12)NC1CCN(Cc2ccccc2)CC1	CHEMBL3823197	0
COc1ccc2[nH]cc(CCNC(=O)CC3CCN(Cc4ccccc4C)CC3)c2c1	CHEMBL3823317	0
Cc1cccc(CN2CCC(CC(=O)NCCc3c[nH]c4ccccc34)CC2)c1	CHEMBL3823464	0
CNC(=O)Oc1ccc2c(c1)[C@@]1(C)CCN(C)[C@H]1N2C	CHEMBL382351	0
COc1ccc2[nH]cc(CCNC(=O)CC3CCN(Cc4cccc(C)c4)CC3)c2c1	CHEMBL3823538	0
COc1ccc2[nH]cc(CCNC(=O)C3CCN(Cc4ccccc4C)CC3)c2c1	CHEMBL3823578	0
O=C(NCCc1c[nH]c2ccccc12)C1CCN(Cc2ccccc2)CC1	CHEMBL3824057	0
Cc1ccccc1CN1CCC(CC(=O)NCCc2c[nH]c3ccccc23)CC1	CHEMBL3824239	0
COc1ccc2[nH]cc(CCNC(=O)C3CCN(Cc4ccccc4)CC3)c2c1	CHEMBL3824362	0
CCCCCCCNC(=O)Oc1ccc(-n2cc(COc3ccc4ccc(=O)oc4c3)nn2)cc1	CHEMBL3826998	0
CCCCCCCCC1OCc2c[n+](C)c(C)c(OC(=O)N(C)C)c2CO1	CHEMBL3827011	0
CCCCCCCNC(=O)Oc1cccc(Cn2cc(COc3ccc4ccc(=O)oc4c3)nn2)c1	CHEMBL3827284	0
Cc1c(OC(=O)N(C)C)c2c(c[n+]1C)COC(C(C)C)OC2	CHEMBL3827347	0
CCCC1OCc2c[n+](C)c(C)c(OC(=O)N(C)C)c2CO1	CHEMBL3827449	0
NC(=O)c1cc[n+](CC[n+]2cccc(NC(=O)/C=N\O)c2)cc1	CHEMBL3827575	0
Cc1c(OC(=O)N(C)C)c2c(c[n+]1C)COC(C(C)(C)C)OC2	CHEMBL3827624	0
CCCCCCc1ccc(NC(=O)Oc2cccc(CN(C)CCCOc3ccc4ccc(=O)oc4c3)c2)cc1	CHEMBL3827765	0
Cc1c(OC(=O)N(C)C)c2c(c[n+]1C)COCOC2	CHEMBL3827856	0
O=C(NCCCCCc1ccccc1)Oc1ccc(-n2cc(COc3ccc4ccc(=O)oc4c3)nn2)cc1	CHEMBL3827950	0
CCCCCCCC1OCc2c[n+](C)c(C)c(OC(=O)N(C)C)c2CO1	CHEMBL3828028	0
CCC1OCc2c[n+](C)c(C)c(OC(=O)N(C)C)c2CO1	CHEMBL3828273	0
O=C(NCCCCCc1ccccc1)Oc1cccc(-n2cc(COc3ccc4ccc(=O)oc4c3)nn2)c1	CHEMBL3828281	0
NC(=O)c1cc[n+](CCC[n+]2cccc(NC(=O)/C=N\O)c2)cc1	CHEMBL3828381	0
NC(=O)c1cc[n+](CCCC[n+]2cccc(NC(=O)/C=N\O)c2)cc1	CHEMBL3828385	0
NC(=O)c1cc[n+](CCCCC[n+]2cccc(NC(=O)/C=N\O)c2)cc1	CHEMBL3828586	0
Cc1c(OC(=O)N(C)C)c2c(c[n+]1C)COC(C)OC2	CHEMBL3828644	0
Cc1c(OC(=O)N(C)C)c2c(c[n+]1C)COC(C)(C)OC2	CHEMBL3828739	0
COc1ccc(CC2=[N+](C)CCc3cc(OC)c(OC)cc32)cc1OC	CHEMBL383242	0
NC(=O)c1cc[n+](COC[n+]2ccccc2/C=N/O)cc1	CHEMBL385181	0
COc1ccc2c(c1)c1cc[n+](C)cc1n2C	CHEMBL385778	0
COc1ccc(CN(C)CCCCCCCOc2ccc3c(=O)c4ccccc4oc3c2)c(OC)c1OC	CHEMBL387849	0
CCOP(=S)(OCC)Oc1cc(C)nc(C(C)C)n1	CHEMBL388560	0
CCN(Cc1ccccc1)Cc1cccc(-c2coc3cc(OC)c(OC)cc3c2=O)c1	CHEMBL388714	0
c1cc[n+](CCCCCC[n+]2ccccc2)cc1	CHEMBL389283	0
COc1cccc(CN(C)CCCCCCCOc2ccc3c(=O)c4ccccc4oc3c2)c1OC	CHEMBL389668	0
COc1ccccc1CN(C)CCCOc1ccc2c(=O)c3ccccc3oc2c1	CHEMBL390083	0
CN(CCCCCCCCCCOc1ccc2c(=O)c3ccccc3oc2c1)Cc1ccccc1	CHEMBL390598	0
CN(CCCCCCOc1ccc2c(=O)c3ccccc3oc2c1)Cc1ccccc1	CHEMBL390737	0
CC1=N[C@H]2CC=C3C[C@H]4C(=O)C[C@]5(C)[C@@H]([C@H](C)N(C)C)[C@H](O)C[C@@]5(C)[C@@H]4CC[C@H]3[C@]2(C)CO1	CHEMBL391918	0
O=C(Cc1ccccc1)N1c2ccccc2Sc2ccccc21	CHEMBL394753	0
CCN(CCCCCCNC1=CC(=O)C(NCCCCCCN(CC)Cc2ccccc2[N+](=O)[O-])=CC1=O)Cc1ccccc1[N+](=O)[O-]	CHEMBL395815	0
NC(=O)c1cc[n+](CCC[n+]2ccc(/C=N/O)cc2)cc1	CHEMBL397871	0
CCOC(=O)c1c(C)nc2nc3c(c(N)c2c1-c1ccccc1)CCC3	CHEMBL398249	0
CCOC(=O)c1c(C)nc2nc3c(c(N)c2c1-c1ccc(OC)cc1)CCC3	CHEMBL398250	0
CCOC(=O)c1c(C)nc2nc3c(c(N)c2c1-c1cccc(OC)c1)CCCC3	CHEMBL399040	0
CCOC(=O)c1c(C)nc2nc3c(c(N)c2c1-c1ccncc1)CCCCC3	CHEMBL404407	0
CC[C@@]1(c2cccc(O)c2)CCCCN(CCCCCCCCCN2CCCC[C@@](CC)(c3cccc(O)c3)C2)C1	CHEMBL406645	0
COc1ccccc1CNCCCCCCNCCCCCCCNCCCCCCNCc1ccccc1OC	CHEMBL422977	0
CN(CCCCCCCCCOc1ccc2c(=O)c3ccccc3oc2c1)Cc1ccccc1	CHEMBL427090	0
CN(CCCCCOc1ccc2c(=O)c3ccccc3oc2c1)Cc1ccccc1	CHEMBL427249	0
Cc1c2c(cc[n+]1C)c1cc(O)ccc1n2C	CHEMBL441868	0
COc1ccc(C(=O)c2c(-c3ccc(OCCCCCCCN(C)Cc4ccccc4)cc3)oc3ccccc23)cc1	CHEMBL444427	0
COc1cccc(C(=O)c2c(-c3ccc(OCCCCCCCN(C)Cc4ccccc4)cc3)oc3ccccc23)c1	CHEMBL447857	0
C=C[C@@H]1[C@H]2C=C(C)C[C@]1(NC)c1ccc(=O)[nH]c1C2	CHEMBL448799	0
CCN(CCCCCC(=O)N[C@H]1CCCC[C@@H]1NC(=O)CCCCCN(CC)Cc1ccccc1OC)Cc1ccccc1OC	CHEMBL450506	0
O/N=C/c1cc[n+](C[n+]2ccc(/C=N/O)cc2)cc1	CHEMBL451825	0
C=CC(=O)N1C/C(=C\c2ccc(C)cc2)C(=O)/C(=C/c2ccc(C)cc2)C1	CHEMBL454594	0
Cc1ccc(C(=O)c2c(-c3ccc(OCCCCCCCN(C)Cc4ccccc4)cc3)oc3ccccc23)cc1	CHEMBL455790	0
COc1cc([C@H]2Oc3cc(O)c(C/C=C(\C)CCC=C(C)C)c(O)c3C(=O)[C@@H]2O)ccc1O	CHEMBL459258	0
CC1(C)CC(=O)C2C(=Nc3nc4c(c(N)c3C2c2ccc(F)cc2)CCCC4)C1	CHEMBL468000	0
CC1(C)CC(=O)C2C(=Nc3nc4c(c(N)c3C2c2ccncc2)CCCC4)C1	CHEMBL468002	0
COc1ccc(C(=O)c2ccc(CN(C)Cc3cccc(C)c3)cc2)cc1OC	CHEMBL471581	0
COc1ccc(C(=O)c2ccc(/C=C/CN(C)Cc3ccccc3)cc2)cc1OC	CHEMBL474836	0
COc1ccc(C(=O)c2ccc(CN(C)Cc3ccccc3)cc2)cc1F	CHEMBL474837	0
COc1ccc(C(=O)c2ccc(CN(C)Cc3cccc([N+](=O)[O-])c3)cc2)cc1OC	CHEMBL490360	0
COc1ccc(C(=O)c2ccc(CN3CCOCC3)cc2)cc1OC	CHEMBL491346	0
COc1ccc(C(=O)c2ccc(CN(C)CCN(C)C)cc2)cc1OC	CHEMBL491526	0
C#CCN(C)Cc1ccc(C(=O)c2ccc(OC)c(OC)c2)cc1	CHEMBL491527	0
COc1ccc(C(=O)c2ccc(CN3CCc4ccccc4C3)cc2)cc1OC	CHEMBL491528	0
CN(Cc1ccccc1)Cc1ccc(C(=O)c2ccc3ccccc3c2)cc1	CHEMBL491562	0
COc1ccc(C(=O)c2ccc(CN(CCN(C)C)Cc3ccccc3)cc2)cc1OC	CHEMBL492098	0
CC(C)NP(=O)(NC(C)C)OP(=O)(NC(C)C)NC(C)C	CHEMBL494887	0
CCN(CCCCCC(=O)N[C@H]1CC[C@H](NC(=O)CCCCCN(CC)Cc2ccccc2OC)CC1)Cc1ccccc1OC	CHEMBL499722	0
CCN(CCCCCC(=O)N[C@H]1CCCC[C@H]1NC(=O)CCCCCN(CC)Cc1ccccc1OC)Cc1ccccc1OC	CHEMBL499825	0
COc1ccccc1CNCCCCCCNCCCCCCCCNCCCCCCNCc1ccccc1OC	CHEMBL500996	0
COc1ccc(C(=O)c2c(-c3ccc(OCCCCCCCN(C)Cc4ccccc4)cc3)oc3ccccc23)cc1OC	CHEMBL504674	0
Cc1cccc(C(=O)c2c(-c3ccc(OCCCCCCCN(C)Cc4ccccc4)cc3)oc3ccccc23)c1	CHEMBL506588	0
O=c1c2ccccc2[se]n1-c1ccccc1	CHEMBL51085	0
COc1ccc(C(=O)c2ccc(CN(CCO)Cc3ccccc3)cc2)cc1OC	CHEMBL511468	0
CC(=O)c1c(-c2ccc(OCCCCCCCN(C)Cc3ccccc3)cc2)oc2ccccc12	CHEMBL511948	0
COc1ccccc1CN(C)Cc1ccc(C(=O)c2ccc(OC)c(OC)c2)cc1	CHEMBL513236	0
COc1ccc(C(=O)c2ccc(CN(C)Cc3ccccc3)cc2)cc1	CHEMBL514966	0
CCN(CC)Cc1ccc(C(=O)c2ccc(OC)c(OC)c2)cc1	CHEMBL523311	0
O=C(NCc1ccccc1)O[C@H]1CO[C@@H]2[C@H](OC(=O)c3ccccc3)CO[C@H]12	CHEMBL523830	0
c1ccc(-c2ccc(NCCCCCN3CCc4ccccc4C3)nn2)cc1	CHEMBL543711	0
CSc1[nH]nc2nc3c(c(N)c12)C1CC(C)=CC(C3)C1	CHEMBL572858	0
CC1=CC2Cc3nc4cc(Cl)ccc4c(Cl)c3C(C1)C2	CHEMBL572865	0
CCC1=CC2Cc3nc4cc(Cl)ccc4c(Cl)c3C(C1)C2	CHEMBL572866	0
CCC1=CC2Cc3nc4cc(OC)c(OC)cc4c(N)c3C(C1)C2	CHEMBL573094	0
CCCSc1nc2nc3c(c(N)c2s1)C1CC(C)=CC(C3)C1	CHEMBL574261	0
COc1cc2nc3c(c(N)c2cc1OC)C1CC(C)=CC(C3)C1	CHEMBL574267	0
C[C@H]1CCC[C@@H](C)N1S(=O)(=O)c1ccc([N+](=O)[O-])cc1	CHEMBL574487	0
CC1=CC2Cc3nc4oc(C)c(C)c4c(N)c3C(C1)C2	CHEMBL574746	0
CC1=CC2Cc3nc4oc(C5CC5)nc4c(N)c3C(C1)C2	CHEMBL574747	0
CC1=CC2Cc3nc4n[nH]cc4c(N)c3C(C1)C2	CHEMBL574948	0
CC1=CC2Cc3[nH]c4cc(Cl)ccc4c(=O)c3C(C1)C2	CHEMBL575166	0
C#CCCCCCCN1CCc2cc(OC)c(OC)cc2C1c1ccc([N+](=O)[O-])cc1	CHEMBL575167	0
C#CCCCCCCN1CCc2cc(OC)c(OC)cc2C1c1cccc([N+](=O)[O-])c1	CHEMBL575810	0
CC1=CC2Cc3nc4cc(Cl)ccc4c(NC(=O)CCl)c3C(C1)C2	CHEMBL576004	0
CC1=CC2Cc3nc4oc(C5CCC5)nc4c(N)c3C(C1)C2	CHEMBL576189	0
CCCSc1nc2nc3c(c(N)c2s1)C1CC(CC)=CC(C3)C1	CHEMBL576384	0
CCC1=CC2Cc3nc4oc(C)c(C)c4c(N)c3C(C1)C2	CHEMBL583776	0
CCC1=CC2Cc3nc4oc(C5CC5)nc4c(N)c3C(C1)C2	CHEMBL584003	0
Clc1cccc(Cl)c1CO/N=C/c1cc[n+](CCC[n+]2ccc(/C=N/OCc3c(Cl)cccc3Cl)cc2)cc1	CHEMBL590603	0
COP(=O)(OC)O/C(C)=C1\CCOC1=O	CHEMBL591470	0
COP1(=O)CCCC(CO)=C(C)O1	CHEMBL592856	0
COc1cc2occ(-c3ccc(N4CCCC4)cc3)c(=O)c2cc1OC	CHEMBL594229	0
CCN(CC)CCCOc1ccc2c(c1)=C/C(=C\c1ccc(CN(C)Cc3ccccc3)cc1)C=2O	CHEMBL597001	0
CCN(Cc1ccccc1)Cc1ccc(/C=C2\C=c3ccc(OC)cc3=C2O)cc1	CHEMBL597405	0
CN(Cc1ccccc1)Cc1ccc(/C=C2\C=c3ccccc3=C2O)cc1	CHEMBL597406	0
COc1ccc2c(c1)C(=O)/C(=C/c1ccc(CN(C)Cc3ccccc3)cc1)CC2	CHEMBL597795	0
COc1cc2c(cc1OC)=C(O)/C(=C/c1ccc(CN(C)Cc3ccccc3)cc1)C=2	CHEMBL598632	0
CCN(CC)CCCCOc1ccc2c(c1)=C/C(=C\c1ccc(CN(C)Cc3ccccc3)cc1)C=2O	CHEMBL599252	0
CCN(CC)CCOc1ccc2c(c1)=C(O)/C(=C/c1ccc(CN(C)Cc3ccccc3)cc1)C=2	CHEMBL599253	0
CCN(CC)CCCOc1ccc2c(c1)=C(O)/C(=C/c1ccc(CN(C)Cc3ccccc3)cc1)C=2	CHEMBL599254	0
Nc1c2c(nc3ccc([N+](=O)[O-])cc13)CCCC2	CHEMBL59977	0
c1ccc2c(c1)ccc[n+]2CCCCCC[n+]1cccc2ccccc21	CHEMBL601410	0
COC(=O)C1=C(C)O[P@](=O)(OC)CC[C@H]1COCc1ccccc1	CHEMBL604255	0
CCN(CC)CCOc1ccc2c(c1)=C/C(=C\c1ccc(CN(C)Cc3ccccc3)cc1)C=2O	CHEMBL604715	0
COC(=O)C1=C(C)O[P@@](=O)(OC)CC[C@H]1COCc1ccccc1	CHEMBL606034	0
COc1ccc2c(c1)=C/C(=C\c1ccc(CN(C)Cc3ccccc3)cc1)C=2O	CHEMBL610219	0
CCN(CCCCCCNc1ccc(CCc2ccc(NCCCCCCN(CC)Cc3ccccc3OC)cc2)cc1)Cc1ccccc1OC	CHEMBL611732	0
Nc1ccc2nc3c(c(N)c2c1)CCCC3	CHEMBL61486	0
COc1cc2nc3c(c(N)c2cc1OC)CCCC3	CHEMBL61929	0
Cc1ccc2nc3c(c(N)c2c1)CCCC3	CHEMBL62085	0
CC(=O)CCCCn1c(=O)c2c(ncn2C)n(C)c1=O	CHEMBL628	0
CN1CC[C@@]2(C)c3cc(OC(=O)NCCCCN4CCOCC4)ccc3N(C)[C@@H]12	CHEMBL63173	0
CN/C(=C\[N+](=O)[O-])NCCSCc1csc(CN(C)C)n1	CHEMBL653	0
CN1CC[C@@]2(C)c3cc(OC(=O)NCCCN4CCOCC4)ccc3N(C)[C@@H]12	CHEMBL65667	0
CCN(CC)CC/N=C(\NO)c1nc(-c2ccccc2)no1	CHEMBL69059	0
CCN(CC)CCS/C(=N\O)c1nc(Cc2ccccc2)no1	CHEMBL71994	0
C[n+]1ccccc1/C=N/O	CHEMBL748	0
CN1CC[C@]2(C)c3cc(OC(=O)Nc4ccccc4)ccc3N(C)C12	CHEMBL75919	0
CNC(=O)Oc1ccc2c(c1)[C@@]1(C)CCN(C)C1N2C	CHEMBL76640	0
CN1CC[C@]2(C)c3cc(OC(=O)Nc4ccccc4)ccc3NC12	CHEMBL99284	0
CNC(=O)Oc1ccc2c(c1)[C@@]1(C)CCN(C)C1N2	CHEMBL99414	0
CN1CC[C@]2(C)c3cc(OC(=O)Nc4ccccc4)ccc3N(Cc3ccccc3)C12	CHEMBL99655	0
