# Supplementary material for: Ligand-Based Pharmacophore Modeling Using Novel 3D Pharmacophore Signatures
Source: Molecules. 2018 Nov 27;23(12):3094. doi: 10.3390/molecules23123094 (PMC6321403; doi:10.3390/molecules23123094)
Supplement: Supplementary file 1 [file molecules-23-03094-s001.zip › cyp3a4.smi]

CC(C)CN(C[C@H](Cc1ccccc1)NC(=O)OCc1cncs1)C[C@@H](Cc1ccccc1)NC(=O)OCc1nccs1	CHEMBL1077930	1
CC(C)CN(C[C@@H](Cc1ccccc1)NC(=O)OCc1cncs1)C[C@@H](Cc1ccccc1)NC(=O)OCc1nccs1	CHEMBL1077931	1
O=C(N[C@@H](Cc1ccccc1)CN(CC1CC1)C[C@H](Cc1ccccc1)NC(=O)OCc1nccs1)OCc1cncs1	CHEMBL1077932	1
CC(C)CCN(C[C@@H](Cc1ccccc1)NC(=O)OCc1cncs1)C[C@@H](Cc1ccccc1)NC(=O)OCc1nccs1	CHEMBL1077933	1
O=C(N[C@@H](Cc1ccccc1)CN(Cc1ccccc1)C[C@@H](Cc1ccccc1)NC(=O)OCc1nccs1)OCc1cncs1	CHEMBL1077935	1
O=C(N[C@H](Cc1ccccc1)CN(Cc1ccccc1)C[C@@H](Cc1ccccc1)NC(=O)OCc1nccs1)OCc1cncs1	CHEMBL1077936	1
COc1cccc(CN(C[C@H](Cc2ccccc2)NC(=O)OCc2cncs2)C[C@@H](Cc2ccccc2)NC(=O)OCc2nccs2)c1	CHEMBL1077937	1
O=C(N[C@@H](Cc1ccccc1)CN(Cc1cccnc1)C[C@H](Cc1ccccc1)NC(=O)OCc1nccs1)OCc1cncs1	CHEMBL1077938	1
O=C(N[C@@H](Cc1ccccc1)CN(Cc1ccncc1)C[C@H](Cc1ccccc1)NC(=O)OCc1nccs1)OCc1cncs1	CHEMBL1077939	1
O=C(N[C@@H](Cc1ccccc1)CN(Cc1cnc[nH]1)C[C@H](Cc1ccccc1)NC(=O)OCc1nccs1)OCc1cncs1	CHEMBL1077940	1
O=C(N[C@@H](Cc1ccccc1)CN(Cc1cnc2ccccc2c1)C[C@@H](Cc1ccccc1)NC(=O)OCc1nccs1)OCc1cncs1	CHEMBL1077941	1
CCN(CC(Cc1ccc(O)cc1)NC(=O)OCc1cncs1)CC(Cc1ccc(O)cc1)NC(=O)OCc1nccs1	CHEMBL1078122	1
O=C(NC(Cc1ccccc1)CN(CC(Cc1ccccc1)NC(=O)OCc1cncs1)CC(Cc1ccccc1)NC(=O)OCc1nccs1)OCc1cncs1	CHEMBL1079228	1
CC(C)(C)CN(C[C@H](Cc1ccccc1)NC(=O)OCc1cncs1)C[C@@H](Cc1ccccc1)NC(=O)OCc1nccs1	CHEMBL1079230	1
O=C(N[C@H](CNC[C@@H](Cc1ccccc1)NC(=O)OCc1nccs1)Cc1ccccc1)OCc1cncs1	CHEMBL1079896	1
O=C(N[C@@H](CNC[C@@H](Cc1ccccc1)NC(=O)OCc1nccs1)Cc1ccccc1)OCc1cncs1	CHEMBL1079897	1
CCN(CC(CC(=O)OC)NC(=O)OCc1cncs1)CC(CC(=O)OC)NC(=O)OCc1nccs1	CHEMBL1081514	1
CCN(CC(CC1CCCCC1)NC(=O)OCc1cncs1)CC(CC1CCCCC1)NC(=O)OCc1nccs1	CHEMBL1081515	1
CC(C)CC1n2cncc2CN(Cc2ccc(Cl)cc2)S1(=O)=O	CHEMBL1209553	1
COc1cnc(-c2ccc(Cn3c(CC(C)(C)C(=O)O)c(SC(C)(C)C)c4cc(OCc5ccc(C)cn5)ccc43)cc2)nc1	CHEMBL1229205	1
Cc1ccc(F)cc1C(C)(C)CC(O)(Cc1cc2ccncc2[nH]1)C(F)(F)F	CHEMBL1254079	1
O=C(NCC(F)(F)F)[C@@H]1CN(Cc2ccn(-c3ccc(Cl)cc3)c2)CCN1C[C@@H](O)C[C@@H](Cc1cccnc1)C(=O)N[C@H]1c2ccccc2OC[C@H]1O	CHEMBL127589	1
C[C@@H](O[C@H]1OCCN(Cc2n[nH]c(=O)[nH]2)[C@H]1c1ccc(F)cc1)c1cc(C(F)(F)F)cc(C(F)(F)F)c1	CHEMBL1471	1
Oc1cccc(-c2ccc3c(-c4cccc(O)c4)c(O)ccc3c2)c1	CHEMBL1650652	1
CCOc1ccc(-c2ccc(-c3cc(CC(=O)O)ccc3OC)c(CN(CC)C(=O)C3CC3)c2)cn1	CHEMBL1668898	1
Cc1cc(C)cc(-c2[nH]c3ccc(C(C)(C)C(=O)N4CC5CCC4CC5)cc3c2[C@H](C)CNCCc2ccc3nc[nH]c3c2)c1	CHEMBL168538	1
CC[C@H](C)n1ncn(-c2ccc(N3CCN(c4ccc(OC[C@@H]5CO[C@@](Cn6cncn6)(c6ccc(Cl)cc6Cl)O5)cc4)CC3)cc2)c1=O	CHEMBL1835949	1
CC[C@H](C)n1ncn(-c2ccc(N3CCN(c4ccc(OC[C@H]5CO[C@](Cn6cncn6)(c6ccc(Cl)cc6Cl)O5)cc4)CC3)cc2)c1=O	CHEMBL1835950	1
CC[C@@H](C)n1ncn(-c2ccc(N3CCN(c4ccc(OC[C@H]5CO[C@](Cn6cncn6)(c6ccc(Cl)cc6Cl)O5)cc4)CC3)cc2)c1=O	CHEMBL1835951	1
CC[C@H](C)n1ncn(-c2ccc(N3CCN(c4ccc(OC[C@H]5CO[C@@](Cn6cncn6)(c6ccc(Cl)cc6Cl)O5)cc4)CC3)cc2)c1=O	CHEMBL1835952	1
CC[C@@H](C)n1ncn(-c2ccc(N3CCN(c4ccc(OC[C@H]5CO[C@@](Cn6cncn6)(c6ccc(Cl)cc6Cl)O5)cc4)CC3)cc2)c1=O	CHEMBL1835953	1
CC[C@H](C)n1ncn(-c2ccc(N3CCN(c4ccc(OC[C@@H]5CO[C@](Cn6cncn6)(c6ccc(Cl)cc6Cl)O5)cc4)CC3)cc2)c1=O	CHEMBL1835954	1
CC[C@@H](C)n1ncn(-c2ccc(N3CCN(c4ccc(OC[C@@H]5CO[C@](Cn6cncn6)(c6ccc(Cl)cc6Cl)O5)cc4)CC3)cc2)c1=O	CHEMBL1835955	1
Cc1ccc(COc2ccc3c(c2)c(SC(C)(C)C)c(CC(C)(C)C(=O)O)n3Cc2ccc(-c3ccc(C)cn3)cc2)nc1	CHEMBL1922662	1
Cc1ccc(COc2ccc3c(c2)c(SC(C)(C)C)c(CC(C)(C)C(=O)O)n3Cc2ccc(-c3ccc(F)cn3)cc2)nc1	CHEMBL1922663	1
COCCCN1C(=O)CCc2ccc(OC[C@H]3CNCC(=O)N3c3ccc(OCCCOCc4ccccc4OC)cc3)cc21	CHEMBL193816	1
O=C(Nc1ccc(-c2ccnc3nc[nH]c23)cc1)Nc1cccc(Br)c1	CHEMBL1951325	1
O=C(Nc1ccc(-c2ccnc3nc[nH]c23)cc1)Nc1cccc([N+](=O)[O-])c1	CHEMBL1951328	1
COC(=O)c1cccc(NC(=O)Nc2ccc(-c3ccnc4nc[nH]c34)cc2)c1	CHEMBL1951329	1
O=C(Nc1ccc(-c2ccccc2)cc1)Nc1ccc(-c2ccnc3nc[nH]c23)cc1	CHEMBL1951331	1
CCOC(=O)c1cccc(NC(=O)Nc2ccc(-c3ccnc4nc[nH]c34)cc2)c1	CHEMBL1951332	1
CNC(=O)c1cccc(NC(=O)Nc2ccc(-c3ccnc4nc[nH]c34)cc2)c1	CHEMBL1951334	1
CCNC(=O)c1cccc(NC(=O)Nc2ccc(-c3ccnc4nc[nH]c34)cc2)c1	CHEMBL1951335	1
CC(C)NC(=O)c1cccc(NC(=O)Nc2ccc(-c3ccnc4nc[nH]c34)cc2)c1	CHEMBL1951336	1
CCN(CC)C(=O)c1cccc(NC(=O)Nc2ccc(-c3ccnc4nc[nH]c34)cc2)c1	CHEMBL1951338	1
CC(C)N(C(=O)c1cccc(NC(=O)Nc2ccc(-c3ccnc4nc[nH]c34)cc2)c1)C(C)C	CHEMBL1951339	1
O=C(Nc1ccc(-c2ccnc3nc[nH]c23)cc1)Nc1cccc(C(=O)Nc2ccccc2)c1	CHEMBL1951340	1
O=C(Nc1ccc(-c2ccnc3nc[nH]c23)cc1)Nc1cccc(C(=O)NC2CCCC2)c1	CHEMBL1951341	1
O=C(Nc1ccc(-c2ccnc3nc[nH]c23)cc1)Nc1cccc(C(=O)N2CCCCC2)c1	CHEMBL1951342	1
N#Cc1ccc(-c2ccc(NC(=O)Nc3ccc(-c4ccnc5nc[nH]c45)cc3)cc2)cc1	CHEMBL1951444	1
O=C(Nc1ccc(-c2ccc(O)cc2)cc1)Nc1ccc(-c2ccnc3nc[nH]c23)cc1	CHEMBL1951445	1
COc1cccc(-c2ccc(NC(=O)Nc3ccc(-c4ccnc5nc[nH]c45)cc3)cc2)c1	CHEMBL1951447	1
COCCCN1C(=O)COc2ccc(SC[C@H]3CNCC(=O)N3c3ccc(OCCCOCc4ccccc4OC)cc3)cc21	CHEMBL205345	1
CN(C[C@@H](O)[C@H](Cc1ccccc1)NC(=O)OCc1cncs1)C(=O)c1ccc2nc(N3CCCC3)oc2c1	CHEMBL2057514	1
CNc1nc2ccc(C(=O)N(CC(C)C)C[C@@H](O)[C@H](Cc3ccccc3)NC(=O)OCc3cncs3)cc2o1	CHEMBL2057517	1
CCNc1nc2ccc(C(=O)N(CC(C)C)C[C@@H](O)[C@H](Cc3ccccc3)NC(=O)OCc3cncs3)cc2o1	CHEMBL2057518	1
CCN(C[C@@H](O)[C@H](Cc1ccccc1)NC(=O)OCc1cncs1)C(=O)c1ccc2nc(N(C)CC)oc2c1	CHEMBL2057520	1
CCN(C[C@@H](O)[C@H](Cc1ccccc1)NC(=O)OCc1cncs1)C(=O)c1ccc2nc(N3CCCC3)oc2c1	CHEMBL2057521	1
O=C(N[C@@H](Cc1ccccc1)[C@H](O)CN(CC1CCCCC1)C(=O)c1ccc2nc(N3CCCC3)oc2c1)OCc1cncs1	CHEMBL2057522	1
CCN(C)c1nc2ccc(C(=O)N(CC3CCCCC3)C[C@@H](O)[C@H](Cc3ccccc3)NC(=O)OCc3cncs3)cc2o1	CHEMBL2057523	1
C#CCN(C[C@@H](O)[C@H](Cc1ccccc1)NC(=O)OCc1cncs1)C(=O)c1ccc2nc(N3CCCC3)oc2c1	CHEMBL2057524	1
CC(C)(C)CN(C[C@@H](O)[C@H](Cc1ccccc1)NC(=O)OCc1cncs1)C(=O)c1ccc2nc(N3CCCC3)oc2c1	CHEMBL2057527	1
CC(C)CN(C[C@@H](O)[C@H](Cc1ccccc1)NC(=O)OCc1cncs1)C(=O)c1ccc2ncoc2c1	CHEMBL2057528	1
CCc1nc2ccc(C(=O)N(CC(C)C)C[C@@H](O)[C@H](Cc3ccccc3)NC(=O)OCc3cncs3)cc2o1	CHEMBL2057786	1
C#CCNc1nc2ccc(C(=O)N(CC#C)C[C@@H](O)[C@H](Cc3ccccc3)NC(=O)OCc3cncs3)cc2o1	CHEMBL2057787	1
CCN(C)c1nc2ccc(C(=O)N(C[C@@H](O)[C@H](Cc3ccccc3)NC(=O)OCc3cncs3)CC(C)(C)C)cc2o1	CHEMBL2057788	1
CCNc1nc2ccc(C(=O)N(C[C@@H](O)[C@H](Cc3ccccc3)NC(=O)OCc3cncs3)CC(C)(C)O)cc2o1	CHEMBL2057789	1
CC(C)CN(C[C@@H](O)[C@H](Cc1ccccc1)NC(=O)OCc1cncs1)C(=O)c1ccc2nc(NCCCn3ccnc3)oc2c1	CHEMBL2057790	1
O=C(N[C@@H](Cc1ccccc1)[C@H](O)CN(CC1CCC(F)(F)CC1)C(=O)c1ccc2nc(N3CCCC3)oc2c1)OCc1cncs1	CHEMBL2057791	1
C#CCN(C)c1nc2ccc(C(=O)N(CC(C)C)C[C@@H](O)[C@H](Cc3ccccc3)NC(=O)OCc3cncs3)cc2o1	CHEMBL2057792	1
CCN(C)c1nc2ccc(C(=O)N(CC(C)C)C[C@H](O)[C@H](Cc3cccnc3)NC(=O)OCc3cncs3)cc2o1	CHEMBL2057794	1
CC(C)CN(C[C@@H](O)[C@H](Cc1ccccc1)NC(=O)OCc1cncs1)C(=O)c1ccc2nc(C(C)C)oc2c1	CHEMBL2058663	1
CC(C)CN(C[C@@H](O)[C@H](Cc1ccccc1)NC(=O)OCc1cncs1)C(=O)c1ccc2nc(-c3ccncc3)oc2c1	CHEMBL2058664	1
CCN(C)c1nc2ccc(C(=O)N(CC(C)C)C[C@H](O)[C@H](Cc3ccccc3)NC(=O)OCc3cncs3)cc2o1	CHEMBL2058665	1
CCN(C)c1nc2ccc(C(=O)N(CC(C)C)C[C@@H](O)[C@H](Cc3ccc(F)cc3)NC(=O)OCc3cncs3)cc2o1	CHEMBL2058900	1
CC(C)CN(C[C@@H](O)[C@H](Cc1ccccc1)NC(=O)OCc1cncs1)C(=O)c1ccc2nc(N)oc2c1	CHEMBL2058901	1
CCN(C)c1nc2ccc(C(=O)N(CC(C)C)C[C@@H](O)[C@H](Cc3ccccc3)NC(=O)OCc3ccc4c(c3)OCO4)cc2o1	CHEMBL2058903	1
Cc1nc2ccc(C(=O)N(CC(C)C)C[C@@H](O)[C@H](Cc3ccccc3)NC(=O)OCc3cncs3)cc2o1	CHEMBL2058904	1
CC(C)CN(C[C@@H](O)[C@H](Cc1ccccc1)NC(=O)OCc1cncs1)C(=O)c1ccc2nc(-c3ccccc3)oc2c1	CHEMBL2058905	1
CCN(C)c1nc2ccc(C(=O)N(CC(C)C)C[C@@H](O)[C@H](Cc3ccccc3)NC(=O)OCc3cccnc3)cc2o1	CHEMBL2058906	1
CCN(C)c1nc2ccc(C(=O)N(CC(C)C)C[C@@H](O)[C@H](Cc3ccccc3)NC(=O)OCc3cncs3)cc2o1	CHEMBL2058910	1
CC(C)CN(C[C@@H](O)[C@H](Cc1ccccc1)NC(=O)OCc1cncs1)C(=O)c1ccc2nc(N)sc2c1	CHEMBL2059114	1
CC(C)CN(C[C@@H](O)[C@H](Cc1ccccc1)NC(=O)OCc1cncs1)C(=O)c1ccc2ncsc2c1	CHEMBL2059115	1
CC(C)CN(C[C@@H](O)[C@H](Cc1cccnc1)NC(=O)OCc1cncs1)C(=O)c1ccc2ncsc2c1	CHEMBL2059116	1
CC(C)CN(C[C@@H](O)[C@H](Cc1ccccc1)NC(=O)OCc1cncs1)C(=O)c1ccc2nc(N3CCCC3)oc2c1	CHEMBL2059117	1
CC(C)CN(C[C@@H](O)[C@H](Cc1ccccc1)NC(=O)OCc1cncs1)C(=O)c1ccc2nc(N(C)C)oc2c1	CHEMBL2059119	1
CC(C)CN(C[C@@H](O)[C@H](Cc1ccccc1)NC(=O)OCc1cncs1)C(=O)c1ccc2nc(N3CCOCC3)oc2c1	CHEMBL2059120	1
CC(C)CN(C[C@@H](O)[C@H](Cc1ccccc1)NC(=O)OCc1cncs1)C(=O)c1ccc2nc(N3CCN(C)CC3)oc2c1	CHEMBL2059123	1
O=C(N[C@H](Cc1cccc2ccccc12)C(=O)N1CCC(N2CCCCC2)CC1)N1CCC(n2c(=O)[nH]c3ccccc32)CC1	CHEMBL2059798	1
O=C(N[C@H](Cc1ccc2ccccc2c1)C(=O)N1CCC(N2CCCCC2)CC1)N1CCC(n2c(=O)[nH]c3ccccc32)CC1	CHEMBL2059799	1
Cn1cc(C[C@@H](NC(=O)N2CCC(n3c(=O)[nH]c4ccccc43)CC2)C(=O)N2CCC(N3CCCCC3)CC2)c2ccccc21	CHEMBL2059802	1
O=C1Nc2ccccc2C2(CCN(C(=O)N[C@H](Cc3csc4ccccc34)C(=O)N3CCC(N4CCCCC4)CC3)CC2)N1	CHEMBL2059906	1
COc1ccccc1COCCCOc1ccc(N2C(=O)CNC[C@@H]2COc2ccc3c(c2)N(CCOC(=O)C(C)C)CCC3)cc1	CHEMBL208112	1
N#Cc1cncc(Oc2c(Cl)cc(NS(=O)(=O)c3ccc(Cl)cc3Cl)cc2Cl)c1	CHEMBL2338479	1
Cc1cncc(Oc2c(Cl)cc(NS(=O)(=O)c3ccc(Cl)cc3Cl)cc2Cl)c1	CHEMBL2338480	1
NC(=O)c1cncc(Oc2c(Cl)cc(NS(=O)(=O)c3ccc(Cl)cc3Cl)cc2Cl)c1	CHEMBL2338481	1
CCN(CC)C(c1cccc(Nc2ccnc3cc(Cl)ccc23)c1)c1nnnn1C(C)(C)C	CHEMBL2413881	1
CC(C)(C)n1nnnc1C(NCCNc1ccnc2cc(Cl)ccc12)c1ccc(Cl)cc1	CHEMBL2414256	1
COc1cc(-c2nc3n(n2)CCC[C@H]3c2ccccc2C(F)(F)F)ccc1-n1cnc(C)c1	CHEMBL2415097	1
CC(=O)Nc1nc2ccc(-c3ccc(N)nc3)cc2s1	CHEMBL2418946	1
COc1c(C2CC2c2ccc(NS(C)(=O)=O)cc2)cc(-c2ccc[nH]c2=O)cc1C(C)(C)C	CHEMBL2431463	1
COc1ccc(CCCOC(Cn2ccnc2)c2ccc(OC)cc2)cc1	CHEMBL258502	1
Clc1ccc(OC(Cn2ccnc2)c2ccc(Cl)cc2Cl)c(Cl)c1	CHEMBL270902	1
Cc1cnc(CNc2cc(-c3ccccc3)nc(-c3ccncc3)n2)nc1	CHEMBL271121	1
O=C(NCC(F)(F)F)[C@@H]1CN(Cc2ccn(-c3cccc(Cl)c3)c2)CCN1C[C@@H](O)C[C@@H](Cc1cccnc1)C(=O)N[C@H]1c2ccccc2OC[C@H]1O	CHEMBL276081	1
O=S(=O)(Nc1ccc(-n2ccnc2)cc1)c1cc(Cl)cc(Cl)c1	CHEMBL3087352	1
Cc1nc(CN(C)C(=O)N[C@H](C(=O)N[C@H](CC[C@H](Cc2ccccc2)NC(=O)OCc2cncs2)Cc2ccccc2)C(C)C)cs1	CHEMBL3115162	1
CC(C)[C@H](NC(=O)N(C)Cc1cncs1)C(=O)N[C@H](CC[C@H](Cc1ccccc1)NC(=O)OCc1cncs1)Cc1ccccc1	CHEMBL3115165	1
CC(C)c1nc(CN(C)C(=O)N[C@@H](Cn2cccn2)C(=O)N[C@H](CC[C@H](Cc2ccccc2)NC(=O)OCc2cncs2)Cc2ccccc2)cs1	CHEMBL3115186	1
O=C(N[C@@H](CC[C@@H](Cc1ccccc1)NC(=O)[C@H](CO)NC(=O)N(Cc1cncs1)C1CC1)Cc1ccccc1)OCc1cncs1	CHEMBL3115190	1
CC(C)c1nc(CN(C)C(=O)N[C@@H](Cc2cnc[nH]2)C(=O)N[C@@H](CC[C@@H](Cc2ccccc2)NC(=O)OCc2cncs2)Cc2ccccc2)cs1	CHEMBL3115191	1
CC1Cc2cc(F)ccc2N1C(=O)Cc1nc(N2CCOCC2)sc1C(N)=O	CHEMBL3125375	1
CC(C)(C)S(=O)(=O)C[C@H](C1CC1)N1C(=O)[C@@](C)(CC(=O)O)C[C@H](c2cccc(Cl)c2)[C@H]1c1ccc(Cl)cc1	CHEMBL3125537	1
Nc1noc2ccc(-c3cc(Cl)ccc3Oc3cc(F)c(S(=O)(=O)Nc4ncns4)cc3F)cc12	CHEMBL3341983	1
O=C(NCC(F)(F)F)[C@@H]1CN(Cc2ccn(-c3ccc(F)c(F)c3F)c2)CCN1C[C@@H](O)C[C@@H](Cc1cccnc1)C(=O)N[C@H]1c2ccccc2OC[C@H]1O	CHEMBL334379	1
Cc1ccc(F)cc1C(C)(C)CC(O)(Cc1cc2cc(N3CCOCC3)ncc2[nH]1)C(F)(F)F	CHEMBL3358929	1
CC(C)(CC(O)(Cc1cc2cc(N3CCOCC3)ncc2[nH]1)C(F)(F)F)c1ccccc1	CHEMBL3358932	1
CC(C)(CC(O)(Cc1cc2cc(N3CCOCC3)ncc2[nH]1)C(F)(F)F)c1cccc(F)c1	CHEMBL3358933	1
CC(C)(CC(O)(Cc1cc2cc(N3CCOCC3)ncc2[nH]1)C(F)(F)F)c1ccc(F)cc1	CHEMBL3358934	1
CCOC(=O)c1[nH]cc2c1N=C1CCCC(=O)C1C2c1ccc(Sc2nc3cccc(Cl)c3[nH]2)o1	CHEMBL3393479	1
CCOC(=O)c1[nH]cc2c1N=C1CCCC(=O)C1C2c1ccc(Sc2nc3c(N)cccc3[nH]2)o1	CHEMBL3393483	1
CC(C)(C)S(=O)(=O)C[C@H](C1CC1)N1C(=O)[C@@](C)(CC(=O)O)C[C@H](c2cccc(Cl)c2)[C@H]1c1ccc(Cl)c(F)c1	CHEMBL3407554	1
COc1cc(NC(=O)C[C@@]2(C)C[C@H](c3cccc(Cl)c3)[C@@H](c3ccc(Cl)cc3)N([C@H](CS(=O)(=O)C(C)(C)C)C3CC3)C2=O)ccc1C(=O)O	CHEMBL3407558	1
COc1cc(NC(=O)C[C@@]2(C)C[C@H](c3cccc(Cl)c3)[C@@H](c3ccc(Cl)c(F)c3)N([C@H](CS(=O)(=O)C(C)(C)C)C3CC3)C2=O)ccc1C(=O)O	CHEMBL3407575	1
CC(C)[C@H](NC(=O)c1ccc2n[nH]c(-c3ccc(N4C5CCC4COC5)cc3)c2c1)c1ccccc1Cl	CHEMBL3422083	1
CC(C)S(=O)(=O)n1c(N)nc2ccc(-c3[nH]c(-c4c(F)cccc4F)nc3-c3ccccc3)cc21	CHEMBL364572	1
COc1cncc(-c2cnc(C(C)(C)N3CCN(C[C@@H](O)C[C@@H](Cc4ccccc4)C(=O)N[C@H]4c5ccccc5OC[C@H]4O)[C@H](C(=O)NCC(F)(F)F)C3)o2)c1	CHEMBL3706615	1
CC(C)(c1ccc(-c2ccncc2)o1)N1CCN(C[C@@H](O)C[C@@H](Cc2ccccc2)C(=O)N[C@H]2c3ccccc3OC[C@H]2O)[C@H](C(=O)NCC(F)(F)F)C1	CHEMBL3706620	1
CC(C)(c1ncc(-c2cnccc2Cl)o1)N1CCN(C[C@@H](O)C[C@@H](Cc2ccccc2)C(=O)N[C@H]2c3ccccc3OC[C@H]2O)[C@H](C(=O)NCC(F)(F)F)C1	CHEMBL3706622	1
Cc1cn(-c2cc3c(cc2F)Nc2nc(Cc4ccccc4)ccc2C(=O)N3)cn1	CHEMBL3771295	1
COc1ccccc1COCCCOc1ccc(N2C(=O)CNC[C@@H]2COc2ccc3c(c2)N(CCN(C)C(C)=O)CCC3)cc1	CHEMBL377512	1
COCCCN1CCCc2ccc(OC[C@H]3CNCC(=O)N3c3ccc(OCCCOCc4ccccc4OC)cc3)cc21	CHEMBL377531	1
COc1ccccc1COCCCOc1ccc(N2C(=O)CNC[C@@H]2COc2ccc3c(c2)N(CCN2CCCC2=O)CCC3)cc1	CHEMBL380866	1
N#Cc1ccccc1Cn1c(N2CCC[C@@H](N)C2)nc2c(Cl)cc(Cl)cc2c1=O	CHEMBL390529	1
Cc1cc(C)cc(-c2[nH]c3sc(C(C)(C)C(=O)N4C5CCC4CC5)cc3c2CCN2CCN(CC(=O)N3CCOCC3)CC2)c1	CHEMBL399772	1
COc1ccccc1COCCCOc1ccc(N2C(=O)CNC[C@@H]2COc2ccc3c(c2)N(CCNC(C)=O)CCC3)cc1	CHEMBL411885	1
CC[C@@H](C)n1ncn(-c2ccc(N3CCN(c4ccc(OC[C@@H]5CO[C@@](Cn6cncn6)(c6ccc(Cl)cc6Cl)O5)cc4)CC3)cc2)c1=O	CHEMBL454471	1
O=C(NC1CCN(Cc2ccn(-c3ccc(C(F)(F)F)cc3)c2)CC1)NC(Cn1ccnc1)c1ccccc1	CHEMBL557263	1
CCC(C)n1ncn(-c2ccc(N3CCN(c4ccc(OCC5COC(Cn6cncn6)(c6ccc(Cl)cc6Cl)O5)cc4)CC3)cc2)c1=O	CHEMBL64391	1
C[C@H](NC(=O)/C=C/c1ccc(F)cc1)c1ccc(F)c(N2CCOCC2)c1	CHEMBL100379	0
CCCCc1ccccc1/N=C/NO	CHEMBL100917	0
CCCCc1ccc(N=CNO)cc1	CHEMBL103313	0
c1ccc(COc2ccc3cccnc3c2)cc1	CHEMBL1081779	0
CCn1cc(-c2ccnc3[nH]c(-c4cccc(CN(C)C)c4)cc23)c(-c2ccc(NC(=O)N(C)C)cc2)n1	CHEMBL1090479	0
CN(C)CCCOc1ccc(-n2ccnc2)cc1	CHEMBL114297	0
OCc1ncc2n1-c1ccc(Cl)cc1C(c1ccccc1F)=NC2	CHEMBL1188	0
OC1N=C(c2ccccc2F)c2cc(Cl)ccc2-n2cncc21	CHEMBL121550	0
COCCn1c(=O)n(C2CCN(C(=O)C3CCN(Cc4ccncc4)CC3)CC2)c2ccccc21	CHEMBL1222717	0
CCOCCn1c(=O)n(C2CCN(C(=O)C3CCN(Cc4ccncc4)CC3)CC2)c2ccccc21	CHEMBL1222718	0
CCOCCCn1c(=O)n(C2CCN(C(=O)C3CCN(Cc4ccncc4)CC3)CC2)c2ccccc21	CHEMBL1222799	0
O=C(C1CCN(Cc2ccncc2)CC1)N1CCC(n2c(=O)n(CCN3CCCCC3)c3ccccc32)CC1	CHEMBL1222863	0
O=C(C1CCN(Cc2ccncc2)CC1)N1CCC(n2c(=O)n(CCN3CCOCC3)c3ccccc32)CC1	CHEMBL1222864	0
C[C@@H]1CCO[C@H]2Cn3cc(C(=O)NCc4ccc(F)cc4F)c(=O)c(O)c3C(=O)N21	CHEMBL1229211	0
O=S(=O)(Nc1cc(Cl)c(Oc2cnc3ccccc3c2)c(Cl)c1)c1ccc(Cl)cc1Cl	CHEMBL1236924	0
NCCc1cccnc1	CHEMBL1256004	0
C/C=C/C[C@@H](C)[C@@H](O)[C@H]1C(=O)N[C@@H](CC)C(=O)N(C)[C@H](SCCN(C)C)C(=O)N(C)[C@@H](CC(C)(C)O)C(=O)N[C@@H](C(C)C)C(=O)N(C)[C@@H](CC(C)C)C(=O)N[C@@H](C)C(=O)N[C@H](C)C(=O)N(C)[C@@H](CC(C)C)C(=O)N(C)[C@@H](CC(C)C)C(=O)N(C)[C@@H](C(C)C)C(=O)N1C	CHEMBL1269597	0
Cc1c2c(=O)n(-c3ccccc3Cl)[nH]c2cc(=O)n1Cc1ccccn1	CHEMBL1276946	0
Cc1ccc(F)cc1Cn1c(N2CCC[C@@](C)(N)C2)cc2ncn(C)c(=O)c21	CHEMBL1287901	0
Cn1c(=O)c2c(cc(N3CCC[C@@](C)(N)C3)n2Cc2cc(F)ccc2Cl)n(C)c1=O	CHEMBL1288260	0
Cc1ccc(F)cc1Cn1c(N2CCC[C@@](C)(N)C2)cc2c1c(=O)n(C)c(=O)n2C	CHEMBL1288261	0
CN(C)C(=O)Cn1c(=O)n(C)c(=O)c2c1cc(N1CCC[C@@](C)(N)C1)n2Cc1cc(F)ccc1Cl	CHEMBL1288289	0
C[C@]12C[C@H](O)[C@@]3(F)[C@@H](CCC4=CC(=O)C=C[C@@]43C)[C@@H]1C[C@@H](O)[C@]2(O)C(=O)CO	CHEMBL1451	0
COc1cc(OC)c([C@@H]2[C@H](C)[C@@H](C)[C@H]2c2cc(OC)c(OC)cc2OC)cc1OC	CHEMBL156339	0
COc1c(-c2ccc(O)cc2)oc2cc(O)cc(O)c2c1=O	CHEMBL165064	0
Fc1ccc([C@@H]2CCNC[C@H]2COc2ccc3c(c2)OCO3)cc1	CHEMBL1708	0
O/N=C/c1ccc(-c2cccnc2)s1	CHEMBL178534	0
c1ccc(Cn2cnc(-c3cccnc3)c2)cc1	CHEMBL178780	0
Cc1cn(-c2cccnc2)cn1	CHEMBL178781	0
Fc1ccc(-c2ccsc2)cn1	CHEMBL179005	0
O=Cc1ccc(-c2cccnc2)s1	CHEMBL179398	0
Cn1cncc1-c1cccnc1	CHEMBL179399	0
c1cncc(-n2ccnc2)c1	CHEMBL179477	0
Cc1ccc(-c2cccnc2)nc1	CHEMBL179589	0
c1cncc(-c2cccs2)c1	CHEMBL179618	0
Cc1cscc1-c1cccnc1	CHEMBL179704	0
c1cncc(-c2cccnc2)c1	CHEMBL179763	0
c1ccc2cc([C@@]34CCC[C@@H]3CNC4)ccc2c1	CHEMBL1813477	0
C[C@@H](c1ccc(-c2ccc(F)cc2F)cc1)N1CC[C@](CCNS(N)(=O)=O)(c2ccc(F)cc2)OC1=O	CHEMBL1829776	0
CCN1c2ncc(CCOc3ccc(C(=O)O)cc3C)cc2C(=O)N(C)c2ccc(F)nc21	CHEMBL189942	0
O=C(NCCN1CCC2(CC1)C(=O)NCN2c1cccc(F)c1)c1ccc(F)c(F)c1	CHEMBL1907089	0
CN1CCN(C(=O)[C@@H](COCc2ccccc2)NC(=O)c2cccnc2Oc2ccc(C(F)(F)F)cc2Cl)CC1	CHEMBL1911817	0
CN1CCN(C(=O)[C@@H](COCc2ccnc(Cl)c2)NC(=O)c2cccnc2Oc2ccc(C(F)(F)F)cc2Cl)CC1	CHEMBL1911822	0
CN1CCN(C(=O)[C@@H](COCC(C)(C)C)NC(=O)c2cccnc2Oc2ccc(C(F)(F)F)cc2Cl)CC1	CHEMBL1911823	0
CN[C@@H]1CCN(C(=O)[C@@H](COCc2ccccc2)NC(=O)c2cccnc2Oc2ccc(C(F)(F)F)cc2Cl)C1	CHEMBL1911827	0
CCN(Cc1cc(C(F)(F)F)ccc1-c1cc(CC(=O)O)ccc1OC)C(=O)OCc1ccccc1	CHEMBL1916700	0
CCN(Cc1cc(C(F)(F)F)ccc1-c1cc(CC(=O)O)ccc1OC)C(=O)OCc1ccc(Cl)cc1	CHEMBL1916708	0
CCN1c2ncc(CCOc3ccc(C(=O)O)cc3C)cc2C(=O)N(C)c2cccnc21	CHEMBL192530	0
COc1ccc(-c2sc(/N=C/c3ccc(N(C)CCC#N)cc3)c(C#N)c2C)cc1OC	CHEMBL1928092	0
CC(C)S(=O)(=O)n1c(N)nc2ccc(-c3nc(C(C)(C)C)[nH]c3-c3ccc(F)cc3)cc21	CHEMBL193055	0
Nc1nc2ccc(-c3[nH]c(-c4c(F)cccc4F)nc3-c3ccccc3)cc2n1S(=O)(=O)C1CCCC1	CHEMBL193247	0
COc1ccc2cc(-c3cc(-c4cc(Cl)cc(Cl)c4)nn3[C@@H](C)c3ccc(C(=O)NCCC(=O)O)cc3)ccc2c1	CHEMBL1933349	0
O=c1[nH]c2cc(Br)ccc2c2nc(-c3ccccc3Cl)[nH]c12	CHEMBL1934810	0
O=C(O)C1(c2ccc(-c3ccc(C4CCCCC4)cc3)c(F)c2)CC1	CHEMBL194838	0
Cc1c[nH]c2ncnc(-c3ccc(NC(=O)Nc4cccc(C(=O)NC(C)C)c4)cc3)c12	CHEMBL1951346	0
CC(C)NC(=O)c1cccc(NC(=O)Nc2ccc(-c3ncnc4[nH]cc(Cl)c34)cc2)c1	CHEMBL1951348	0
CCn1c(=O)[nH]c2ncnc(-c3ccc(NC(=O)Nc4cccc(C(=O)NC(C)C)c4)cc3)c21	CHEMBL1951350	0
N#CCn1c(=O)c(CCO)c(-c2cc(Cl)ccc2O)c2cc(C(F)(F)F)ccc21	CHEMBL195561	0
NC(=O)CS(=O)Cc1ccccc1-c1ccc(Cl)cc1	CHEMBL1956397	0
O=C(O)C1(c2ccc(-c3ccc(Cl)c(Cl)c3)c(F)c2)CC1	CHEMBL196945	0
CC1(C)CC(Oc2ccc(-c3ccc(C4(C(=O)O)CC4)cc3F)cc2)CC(C)(C)C1	CHEMBL197140	0
CC(C(=O)O)c1ccc(-c2ccc(-c3ccc(O)cc3)cc2)c(F)c1	CHEMBL197202	0
O=C(Nc1ccc(Oc2ccc(F)cc2)cc1)[C@@H]1C[C@@H](Cc2ccc(F)cc2)CN1C(=O)Cn1cncn1	CHEMBL2018485	0
CCCCSc1nc2ccc(OC)cc2[nH]1	CHEMBL2018903	0
CCCCCSc1nc2ccc(OC)cc2[nH]1	CHEMBL2018904	0
CCCSc1nc2ccc(OC)cc2[nH]1	CHEMBL2018905	0
CCSc1nc2ccc(OC)cc2[nH]1	CHEMBL2018906	0
CCCCCCCSc1nc2ccc(OC)cc2[nH]1	CHEMBL2018908	0
COc1ccc2nc(SCC(C)C)[nH]c2c1	CHEMBL2018909	0
COc1ccc2nc(SCC(C)(C)C)[nH]c2c1	CHEMBL2018910	0
COc1ccc2nc(SCC3CC3)[nH]c2c1	CHEMBL2018911	0
COc1ccc2nc(SCc3ccc(C(C)(C)C)cc3)[nH]c2c1	CHEMBL2018918	0
COc1ccc2nc(SCc3ccc(C(=O)O)cc3)[nH]c2c1	CHEMBL2018922	0
FC(F)Oc1ccc2nc(SCc3ccccn3)[nH]c2c1	CHEMBL2019025	0
CNC[C@H](C[C@H]1CCCOC1)NC(=O)N1CCC[C@@H]([C@@H](OCCNC(=O)OC)c2cccc(Cl)c2)C1	CHEMBL2024248	0
Nc1c(C(=O)c2cccc(OC[C@@H](O)CO)c2)cnn1-c1ccc(F)cc1	CHEMBL203567	0
CC(C)Cn1c(=O)n(C)c(=O)c2c(C(=O)N3CC[C@@H](O)C3)c(Cc3cccc4ncccc34)sc21	CHEMBL204476	0
CC(C)Cn1c(=O)n(C)c(=O)c2c(C(=O)N3CC[C@@H](O)C3)c(Cc3ccnc4ccccc34)sc21	CHEMBL205742	0
CC(C)C[C@@H](NC(=O)N1CCC(n2c(=O)[nH]c3ccccc32)CC1)C(=O)N1CCC(N2CCCCC2)CC1	CHEMBL2059786	0
O=C(NC(Cc1ccc2n[nH]cc2c1)C(=O)N1CCC(N2CCCCC2)CC1)N1CCC(n2c(=O)[nH]c3ccccc32)CC1	CHEMBL2059804	0
O=C(N[C@H](Cc1ccc2[nH]c(=O)oc2c1)C(=O)N1CCC(N2CCCCC2)CC1)N1CCC(N2Cc3ccccc3NC2=O)CC1	CHEMBL2059853	0
O=C1Cc2cc(C[C@@H](NC(=O)N3CCC(N4Cc5ccccc5NC4=O)CC3)C(=O)N3CCC(N4CCCCC4)CC3)ccc2N1	CHEMBL2059877	0
O=C(N[C@H](Cc1ccc2n[nH]nc2c1)C(=O)N1CCC(N2CCCCC2)CC1)N1CCC(N2Cc3ccccc3NC2=O)CC1	CHEMBL2059878	0
O=c1cc(N2CCOCC2)[nH]c(Cc2nc3c(-c4cccs4)cccc3o2)n1	CHEMBL2064413	0
O=C(Cc1nc(=O)cc(N2CCOCC2)[nH]1)Nc1ccccc1	CHEMBL2064419	0
Clc1cc(-c2nc(CSc3nnc(-c4ccncc4)n3C3CC3)no2)ccn1	CHEMBL2069799	0
O=C(NCc1ccncc1)c1nc(CS(=O)(=O)c2ccccc2)no1	CHEMBL2069801	0
c1cc(-c2noc(C3CCCCC3)n2)ccn1	CHEMBL2069803	0
CCCS(=O)(=O)c1ccc2nc(-c3ccccc3-c3ccccc3)[nH]c2c1	CHEMBL2070139	0
CCCS(=O)(=O)c1ccc2nc(-c3cccc(C(F)(F)F)c3)[nH]c2c1	CHEMBL2070142	0
CCCS(=O)(=O)c1ccc2nc(-c3cccc(OC(F)(F)F)c3)[nH]c2c1	CHEMBL2070143	0
CCS(=O)(=O)c1ccc2nc(-c3cc(-c4ccccc4)ccc3F)[nH]c2c1	CHEMBL2070147	0
CCOC1(c2ccc(Br)cc2)SC=C(C)n2c1noc2=O	CHEMBL211204	0
O=C(Cc1nc(=O)cc(N2CCOCC2)[nH]1)Nc1ccc(F)c(Br)c1	CHEMBL2151048	0
O=C(Cc1nc(=O)cc(N2CCOCC2)[nH]1)Nc1ccc(F)cc1	CHEMBL2151821	0
O=C(Cc1nc(=O)cc(N2CCOCC2)[nH]1)Nc1cccc(Cl)c1	CHEMBL2151921	0
COc1cccc(NC(=O)Cc2nc(=O)cc(N3CCOCC3)[nH]2)c1	CHEMBL2151922	0
O=C(Cc1nc(=O)cc(N2CCOCC2)[nH]1)Nc1cccc(Br)c1	CHEMBL2151923	0
Cc1cc(NC(=O)Cc2nc(=O)cc(N3CCOCC3)[nH]2)ccc1F	CHEMBL2151925	0
O=C(Cc1nc(=O)cc(N2CCOCC2)[nH]1)Nc1ccc(F)c(Cl)c1	CHEMBL2151926	0
COc1cc(NC(=O)Cc2nc(=O)cc(N3CCOCC3)[nH]2)ccc1F	CHEMBL2151927	0
Cn1c(CC(=O)Nc2ccc(F)c(Cl)c2)nc(N2CCOCC2)cc1=O	CHEMBL2151935	0
c1ccc([C@H]([C@@H](c2ccccc2)N2CCCCC2)N2CCCCC2)cc1	CHEMBL2152523	0
CN(Cc1cccs1)C(=O)C12CC3CC(CC(C3)C1)C2	CHEMBL2159075	0
CN(Cc1cccn1C)C(=O)C12CC3CC(CC(C3)C1)C2	CHEMBL2159084	0
CN1CCN(C(=O)[C@H](Cc2c[nH]c3ccccc23)NC(=O)C2(c3ccc(Cl)cc3Cl)CC2)CC1	CHEMBL2163829	0
O=C(NO)c1ccc(-c2ccc(CNCc3ccccc3)cn2)s1	CHEMBL216884	0
N=C(N)NC(=O)c1ccc(C2CCN(C(=O)C3CC3)CC2)c(C(F)(F)F)c1	CHEMBL2170607	0
CCC(=O)N1CCC(c2ccc(C(=O)NC(=N)N)cc2C(F)(F)F)CC1	CHEMBL2170609	0
N=C(N)NC(=O)c1ccc(C2CCN(C(=O)c3ccc(S(N)(=O)=O)cc3)CC2)c(C(F)(F)F)c1	CHEMBL2170615	0
Cn1ccnc1C(=O)N1CCC(c2ccc(C(=O)NC(=N)N)cc2C(F)(F)F)CC1	CHEMBL2170617	0
N#Cc1cccc(C(=O)N2CCC(c3ccc(C(=O)NC(=N)N)cc3C(F)(F)F)CC2)c1	CHEMBL2170630	0
CS(=O)(=O)c1ccc(C(=O)N2CCC(c3ccc(C(=O)NC(=N)N)cc3C(F)(F)F)CC2)cc1	CHEMBL2170632	0
N=C(N)NC(=O)c1ccc(C2CCN(C(=O)c3ccc(C(N)=O)cc3)CC2)c(C(F)(F)F)c1	CHEMBL2170638	0
O=C(Nc1nc2ccc(O)cc2s1)c1c(F)ccc(O)c1F	CHEMBL2170747	0
O=C(c1ccc(F)c(O)c1)c1nc2ccc(O)cc2s1	CHEMBL2170750	0
Cc1ccc(C(=O)c2nc3ccc(O)cc3s2)cc1O	CHEMBL2170754	0
Cn1cc(-c2ccc3c(c2)CCN3C(=O)Cc2cccc(C(F)(F)F)c2)c2c(N)ncnc21	CHEMBL2171124	0
O=C(NO)c1ccc(-c2ccn(CCNCc3ccc4c(c3)OCO4)n2)s1	CHEMBL217716	0
CC(=O)N1c2ccc(-c3ccc(C(=O)O)cc3)cc2[C@H](Nc2ccc(Cl)cc2)C[C@@H]1C	CHEMBL2177300	0
N[C@@H]1c2cccnc2[C@H](OC(=O)N2CCC(n3c(=O)[nH]c4ncccc43)CC2)CC[C@H]1c1cccc(F)c1F	CHEMBL2178422	0
COc1ccc(S(=O)(=O)n2cc(C)c3cc(Cl)cnc32)cc1NC1CCN(C)CC1	CHEMBL2179222	0
O=C(O)c1c(O)c(-c2ccc(Cl)cc2)nc2c(-c3ccccc3)cccc12	CHEMBL218583	0
COC(=O)N(NC(=O)c1c(OC)c(-c2ccccc2)nc2ccccc12)c1ccccc1	CHEMBL219162	0
O=C(OCc1ccccc1)N1CCC(CNc2cnccn2)CC1	CHEMBL220660	0
O=C1NC(c2ccc(F)cc2)(c2ccc(F)cc2)CN1C1CCN(Cc2ccccc2)CC1	CHEMBL222424	0
O=C(NCC1CCOCC1)c1cnc(Nc2cc(Cl)cc(Cl)c2)nc1C(F)(F)F	CHEMBL225412	0
O=C(NCC1CCOCC1)c1cnc(Nc2cc(Cl)ccc2F)nc1C(F)(F)F	CHEMBL225464	0
O=C(NCC1CCCCC1)c1cnc(Nc2cccc(Cl)c2)nc1C(F)(F)F	CHEMBL226067	0
O=C(NCC1CCOCC1)c1cnc(Nc2cccc(Cl)c2)nc1C(F)(F)F	CHEMBL226385	0
O=C(NCC1CCCC1)c1cnc(Nc2cccc(Cl)c2)nc1C(F)(F)F	CHEMBL226386	0
O=C(NCC1CCC1)c1cnc(Nc2cccc(Cl)c2)nc1C(F)(F)F	CHEMBL227899	0
Cc1cnc(C)n1CC(=O)c1ccc(-c2ccc(N3C[C@H](Cn4ccnn4)OC3=O)cc2F)cn1	CHEMBL231383	0
Cn1cc(-c2cnc3ccc4ccc(CS(=O)(=O)NCc5ccccn5)cc4c(=O)c3c2)cn1	CHEMBL2323775	0
COc1cccc(CN(CCO)C(=O)Nc2ccc(-c3cn[nH]c3)cc2)c1	CHEMBL2332065	0
COc1cccc(CN(CCN(C)C)C(=O)Nc2ccc(-c3cn[nH]c3)cc2)c1	CHEMBL2332068	0
O=C(N[C@H](Cc1cc(Cl)c2[nH]c(=O)oc2c1)C(=O)N1CCC(N2CCCCC2)CC1)N1CCC(N2Cc3ccccc3NC2=O)CC1	CHEMBL2336417	0
O=S(=O)(Nc1ccc(Oc2cnc3ccccc3c2)c(F)c1)c1ccc(Cl)cc1Cl	CHEMBL2338473	0
Cc1cnc(C(=O)N2C[C@H](c3ccc(F)cc3C)[C@@H](C(=O)N(C)Cc3cc(C(F)(F)F)cc(C(F)(F)F)c3)C2)cn1	CHEMBL235882	0
O=C(O)c1cc(Oc2ccccc2)ccc1NS(=O)(=O)c1ccc(Br)cc1F	CHEMBL2375371	0
Cc1ccc(-c2ccccc2)c(C(=O)N2CC3(CC3)C[C@H]2CNc2ccc(C(F)(F)F)cn2)n1	CHEMBL2381076	0
O=c1[nH]c2cc(-c3cccnc3)ccc2c2nc(-c3ccccc3Cl)[nH]c12	CHEMBL2387605	0
Cc1ccc(C(=O)N(CC(=O)Nc2ncc(-c3ccc(N)cc3)s2)Cc2ccccc2)cn1	CHEMBL2397308	0
Cc1nc(NC(=O)C2(C)CCCCC2)sc1-c1ccc(N)nc1	CHEMBL2397311	0
Cc1nc(NC(=O)C(C)(C)CC(F)(F)F)sc1-c1ccc(N)nc1	CHEMBL2397316	0
Cc1cc(C[C@@H](NC(=O)N2CCC(c3cc4ccccc4[nH]c3=O)CC2)C(=O)N2CCN(C3CCN(C)CC3)CC2)cc2c[nH]nc12	CHEMBL2397415	0
Cc1ccccc1[C@@H]1[C@@H](O[C@H](CO)c2cc(C(F)(F)F)cc(C(F)(F)F)c2)CC[C@@H]2CN(C3=NC(=O)CO3)C[C@H]21	CHEMBL2402572	0
COc1ccnc(Oc2ccc3c(c2)c(=O)ncn3Cc2c(F)cc(F)cc2F)c1C(F)(F)F	CHEMBL2403317	0
CC(C)(C)c1cc(NC(=O)Nc2ccc(Nc3ncnc4ccccc34)cc2)n(-c2cccc(N)c2)n1	CHEMBL2403816	0
Nc1ccccc1NC(=O)c1ccc(CNC2=N[C@@H](c3ccccc3)CS2)cc1	CHEMBL2407717	0
CC(=O)O[C@H]1[C@H](C)O[C@@H](Oc2c(-c3ccc(O)cc3)oc3cc(O)cc(O)c3c2=O)[C@H](O)[C@@H]1OC(C)=O	CHEMBL240954	0
C/C(=C\COc1ccc2ccc(=O)oc2c1)C/C=C/C(C)C	CHEMBL241896	0
CCOC(=O)c1cc(C#N)c(N2CC(C(=O)NS(=O)(=O)Cc3ccc(C)cc3)C2)nc1C	CHEMBL2419487	0
CCOC(=O)c1cc(C#N)c(N2CCC(C(=O)NS(=O)(=O)Cc3ccccc3)CC2)nc1C	CHEMBL2419490	0
CC#CCn1c(N2CCC[C@@H](N)C2)cc(=O)n(Cc2ccc3ccccc3n2)c1=O	CHEMBL2425886	0
CC#CCn1c(N2CCC[C@@H](N)C2)cc(=O)n(Cc2ccc3cc(Br)ccc3n2)c1=O	CHEMBL2425888	0
CC#CCn1c(N2CCC[C@@H](N)C2)cc(=O)n(Cc2ccc3cc(Cl)ccc3n2)c1=O	CHEMBL2425889	0
CC#CCn1c(N2CCC[C@@H](N)C2)cc(=O)n(Cc2ccc3cc(F)ccc3n2)c1=O	CHEMBL2425890	0
CC#CCn1c(N2CCC[C@@H](N)C2)cc(=O)n(Cc2ccc3cc(C)ccc3n2)c1=O	CHEMBL2425891	0
CC#CCn1c(N2CCC[C@@H](N)C2)cc(=O)n(Cc2ccc3cc(OC)ccc3n2)c1=O	CHEMBL2425892	0
CC#CCn1c(N2CCC[C@@H](N)C2)cc(=O)n(Cc2ccc3ccc(F)cc3n2)c1=O	CHEMBL2425894	0
CC#CCn1c(N2CCC[C@@H](N)C2)cc(=O)n(Cc2cc(Cl)c3ccccc3n2)c1=O	CHEMBL2425895	0
O=c1ccc2c(O)c3ccoc3cc2o1	CHEMBL242711	0
CN[C@@H](C)C(=O)N[C@H]1CN(C(=O)c2ccc(N)cc2)c2ccccc2N(Cc2c(OC)ccc3ccccc23)C1=O	CHEMBL2436208	0
CN[C@@H](C)C(=O)N[C@H]1CN(C(=O)CS(C)(=O)=O)c2ccccc2N(Cc2c(OC)ccc3cc(Br)ccc23)C1=O	CHEMBL2436215	0
CN[C@@H](C)C(=O)N[C@H]1CN(C(=O)CC(C)C)c2ccccc2N(Cc2ccccc2)C1=O	CHEMBL2436324	0
CN1CCN(Cc2ccc(-c3cnc4[nH]cc(-c5ccc6[nH]ccc6c5)c4c3)cc2)CC1	CHEMBL2436978	0
Nc1ncc(-c2cnc3[nH]cc(-c4ccc5[nH]ccc5c4)c3c2)cn1	CHEMBL2436983	0
Nc1cc(CN2CCC(C(=O)N3CCC(n4c(=O)n(CCN5CCOCC5)c5ccccc54)CC3)CC2)ccn1	CHEMBL2437421	0
Nc1cc(CN2CCC(C(=O)N3CCC(n4c(=O)n(CCCC(F)(F)F)c5cc(F)ccc54)CC3)CC2)ccn1	CHEMBL2437423	0
Nc1cc(CN2CCC(C(=O)N3CCC(n4c(=O)n(CC5CC5)c5cc(F)ccc54)CC3)CC2)ccn1	CHEMBL2437426	0
Nc1cc(CN2CCC(C(=O)N3CCC(n4c(=O)n(C5CCCC5)c5cc(F)ccc54)CC3)CC2)ccn1	CHEMBL2437427	0
O=c1n(Cc2nc3ccccc3n2CCCCO)c2cnccc2n1C1CC1	CHEMBL243876	0
Cc1csc(NC(=O)c2cc(F)cc(Oc3cncnc3)c2)n1	CHEMBL2440659	0
Cc1cccc(CC(=O)N2CCc3c2ccc(-c2cn(C)c4ncnc(N)c24)c3F)n1	CHEMBL2441340	0
Cc1cc(C)n(CC(=O)N2CCc3c2ccc(-c2cn(C)c4ncnc(N)c24)c3F)n1	CHEMBL2441346	0
Cc1[nH]c2cn(-c3ccn(C)n3)c(=O)c-2c(-c2ccc(Cl)cc2Cl)c1CN	CHEMBL2441831	0
COC[C@H](C)n1cc2[nH]c(C)c(CN)c(-c3ccc(Cl)cc3Cl)c-2c1=O	CHEMBL2441837	0
Cc1[nH]c2cn(C[C@H]3CCCO3)c(=O)c-2c(-c2ccc(Cl)cc2Cl)c1CN	CHEMBL2441838	0
Cc1[nH]c2cn(C[C@@H]3CCCO3)c(=O)c-2c(-c2ccc(Cl)cc2Cl)c1CN	CHEMBL2441839	0
Cc1[nH]c2cn(C[C@@H]3CCCN3)c(=O)c-2c(-c2ccc(Cl)cc2Cl)c1CN	CHEMBL2441840	0
Cc1[nH]c2cn(CC(=O)N3CCCC3)c(=O)c-2c(-c2ccc(Cl)cc2Cl)c1CN	CHEMBL2441954	0
CCN(c1ccccc1)S(=O)(=O)c1ccc(NC(=O)CN(C)C2CCN(C)CC2)c(Cl)c1	CHEMBL2448695	0
CCN(CC)S(=O)(=O)c1ccc(-n2ccnc2)c(NC(=O)c2cnc(-c3ccccc3)nc2)c1	CHEMBL2448698	0
CO/N=C(\C)c1ccc(-n2ccnc2)c(NC(=O)c2cnc(-c3ccccc3)nc2)c1	CHEMBL2448704	0
O=C(NCCc1cnc[nH]1)c1cnc(-c2ccccc2)cn1	CHEMBL2448705	0
CN1CCC(NCC(O)COc2ccc3cc(Br)ccc3c2)CC1	CHEMBL2448709	0
CN(C)S(=O)(=O)c1ccc(-n2ccnc2)c(NC(=O)c2cnc(-c3ccccc3)s2)c1	CHEMBL2448713	0
NCC(=O)N(Cc1cccnc1)c1ccc(-c2nc3ccccc3s2)cc1	CHEMBL2448744	0
CC1=CCC(C)(C)C=CC(=O)C(C)=CCC1	CHEMBL245412	0
CCCCC/C=C/C(=O)CCc1ccc(O)c(OC)c1	CHEMBL25948	0
CC(C)c1nc(COC(=O)N[C@H](C(=O)N[C@@H](Cc2ccccc2)[C@H](O)CN2CCN(Cc3cncs3)C[C@H]2C(=O)NC(C)(C)C)C(C)C)cs1	CHEMBL263179	0
O=C(NCc1ccccn1)c1c2n(c3c(N4CCN(CCc5ccc(F)c(F)c5)CC4)ncnc13)CCCC2	CHEMBL26485	0
NC(=O)c1c2n(c3c(N4CCN(CCc5ccc(F)c(F)c5)CC4)ncnc13)CCCC2	CHEMBL26599	0
CCCCc1ccc(/N=C/NO)c(C)c1	CHEMBL267865	0
CC(C)c1c(-c2nnc(NCCCCN)o2)cn2ncnc(Nc3cc(C(=O)NC4CC4)c(F)cc3F)c12	CHEMBL270193	0
CS(=O)(=O)c1ccc(Cn2cc(-c3ccncc3)cn2)cc1	CHEMBL270903	0
CC(C)c1c(-c2nnc(NCCCN(C)C)o2)cn2ncnc(Nc3cc(C(=O)NC4CC4)c(F)cc3F)c12	CHEMBL271310	0
CCOc1ccc(NC(=O)c2ccc(-n3cnnn3)cc2)cc1	CHEMBL271326	0
Cc1cc(C(C)(C)NC(=O)C(Br)C(C)(C)C)cc(C)n1	CHEMBL271581	0
CCOC(=O)C(Cc1ccc(Cl)cc1Cl)c1ccno1	CHEMBL271621	0
COc1ccc(-c2cc(CNS(=O)(=O)c3ccccc3)on2)cc1	CHEMBL271622	0
CCn1c(SCc2ccc(OC)cc2)nnc1-c1ccncc1	CHEMBL271624	0
O[C@](Cn1cccn1)(c1ccc(F)cc1F)n1cncn1	CHEMBL3085388	0
Cc1c(Cc2cccc(NS(N)(=O)=O)c2F)c(=O)oc2cc(OC(=O)N(C)C)c(F)cc12	CHEMBL3086078	0
O=S(=O)(Nc1ccc(-c2ncccn2)cc1)c1cc(Cl)cc(Cl)c1	CHEMBL3087035	0
CCc1cc(-c2ccc(NS(=O)(=O)c3cc(C(F)(F)F)cc(C(F)(F)F)c3)cc2)ccn1	CHEMBL3087042	0
O=S(=O)(Nc1ccc(-c2ccco2)cc1)c1cc(Cl)cc(Cl)c1	CHEMBL3087348	0
O=S(=O)(Nc1ccc(-c2nnco2)cc1)c1cc(Cl)cc(Cl)c1	CHEMBL3087349	0
O=S(=O)(Nc1ccc(-c2cc[nH]n2)cc1)c1cc(Cl)cc(Cl)c1	CHEMBL3087351	0
Cc1csc(C(C)(O)c2nnc(Nc3ncn(Cc4c(F)cccc4F)n3)s2)n1	CHEMBL3088175	0
COc1ccc(-c2oc3cc(O)cc(O)c3c(=O)c2OC)cc1	CHEMBL309061	0
CC(C)(C1CCN(C(=O)c2ccc(S(C)(=O)=O)cc2OC(F)(F)F)CC1)S(=O)(=O)c1cccc(C(F)(F)F)c1	CHEMBL3092197	0
CC(C)(C1CCN(C(=O)c2cc(F)ccc2S(C)(=O)=O)CC1)S(=O)(=O)c1cccc(C(F)(F)F)c1	CHEMBL3092198	0
O=C1O[C@@H](Cn2ccnn2)CN1c1ccc(-c2ccn3ccnc3c2)c(F)c1	CHEMBL3092421	0
Nc1[nH]nc2nc(-c3ccc(NS(=O)(=O)c4cccc(Cl)c4Cl)cc3)cnc12	CHEMBL3092460	0
COc1ccc(Cl)c(S(=O)(=O)Nc2ccc(-c3cnc4c(C)[nH]nc4n3)cc2)c1	CHEMBL3092467	0
Nc1[nH]nc2nc(-c3ccc(NS(=O)(=O)c4cc(Cl)ccc4F)cc3)cnc12	CHEMBL3092468	0
O=C(C(c1ccc(Cl)cc1)c1cccnc1)N1CCN(c2ccc(C(F)(F)F)cc2)CC1	CHEMBL3104376	0
FC(F)(F)c1ccc(N(c2cccnc2)C2CCN(c3ccc(C(F)(F)F)nc3)CC2)cc1	CHEMBL3104473	0
CS(=O)(=O)c1ccc(N2CCC(N(c3ccc(C#N)cc3)c3cccnc3)CC2)cc1	CHEMBL3104478	0
O=C([C@H](c1ccc(Cl)cc1)c1cccnc1)N1CCN(c2ccc(C(F)(F)F)cc2)CC1	CHEMBL3104525	0
O=C([C@@H](c1ccc(Cl)cc1)c1cccnc1)N1CCN(c2ccc(C(F)(F)F)cc2)CC1	CHEMBL3104526	0
Cc1ccccc1CN1CCC(N(c2ccc(C(F)(F)F)cc2)c2cccnc2)CC1	CHEMBL3104534	0
O=C(c1ccc(F)c(F)c1)N1CCN2C(=O)c3ccccc3[C@@]12c1ccc(Cl)cc1	CHEMBL3105228	0
O=C(Cc1nc(=O)cc(N2CCOCC2)[nH]1)N1CCc2cc(Cl)ccc21	CHEMBL3112592	0
O=C(Cc1nc(=O)cc(N2CCOCC2)[nH]1)N1CCc2ccccc21	CHEMBL3112690	0
O=C(Cc1nc(=O)cc(N2CCOCC2)[nH]1)N1CCc2cc(F)ccc21	CHEMBL3112847	0
O=C(Cc1nc(=O)cc(N2CCOCC2)[nH]1)N1CCc2c(F)cccc21	CHEMBL3112848	0
O=C(Cc1nc(=O)cc(N2CCOCC2)[nH]1)N1CCc2c(Cl)cccc21	CHEMBL3112849	0
O=C(Cc1nc(=O)cc(N2CCOCC2)[nH]1)N1CCc2c(Br)cccc21	CHEMBL3112850	0
COc1cccc2c1CCN2C(=O)Cc1nc(=O)cc(N2CCOCC2)[nH]1	CHEMBL3112852	0
O=C(Cc1nc(=O)cc(N2CCOCC2)[nH]1)N1CCc2c1cccc2C(F)(F)F	CHEMBL3112853	0
O=C(Cc1nc(=O)cc(N2CCOCC2)[nH]1)N1CCc2c(OC(F)(F)F)cccc21	CHEMBL3112854	0
O=C(Cc1nc(=O)cc(N2CCOCC2)[nH]1)N1CCc2c(-c3ccccc3)cccc21	CHEMBL3112855	0
O=C(Cc1nc(=O)cc(N2CCOCC2)[nH]1)N1CCc2c(-c3ccccn3)cccc21	CHEMBL3112856	0
O=C(Cc1nc(=O)cc(N2CCOCC2)[nH]1)N1CCc2c(-c3cccnc3)cccc21	CHEMBL3112857	0
O=C(Cc1nc(=O)cc(N2CCOCC2)[nH]1)N1CCc2c(-c3ccncc3)cccc21	CHEMBL3112858	0
Cn1c(CC(=O)N2CCc3ccccc32)nc(N2CCOCC2)cc1=O	CHEMBL3112861	0
CC1CN(C(=O)Cc2nc(=O)cc(N3CCOCC3)[nH]2)c2ccccc21	CHEMBL3112864	0
CC1(C)CN(C(=O)Cc2nc(=O)cc(N3CCOCC3)[nH]2)c2ccccc21	CHEMBL3112865	0
C[C@H]1Cc2ccccc2N1C(=O)Cc1nc(=O)cc(N2CCOCC2)[nH]1	CHEMBL3112866	0
C[C@@H]1Cc2ccccc2N1C(=O)Cc1nc(=O)cc(N2CCOCC2)[nH]1	CHEMBL3112867	0
Fc1cc(OC(F)(F)C(F)F)cc([C@@](Cc2ccccc2)(Nc2nc3c(F)cc(F)cc3[nH]2)c2ccc(Cl)cn2)c1	CHEMBL3116154	0
Fc1cc(OC(F)(F)C(F)F)cc([C@@](Cc2ccccc2)(Nc2nc3ccc(F)cc3[nH]2)c2ccc(Cl)cn2)c1	CHEMBL3116155	0
Fc1cc(OC(F)(F)C(F)F)cc([C@@](Cc2ccccc2)(Nc2nc(C(F)(F)F)cs2)c2ccc(Cl)cn2)c1	CHEMBL3116158	0
O=C(O)c1sc(N2CCOCC2)nc1CC(=O)N1CCc2c(Cl)cccc21	CHEMBL3125378	0
CC1Cc2c(Cl)cccc2N1C(=O)Cc1nc(N2CCOCC2)sc1C(=O)O	CHEMBL3125379	0
O=C(O)c1sc(N2CCOCC2)nc1CC(=O)N1CCc2cc(F)ccc21	CHEMBL3125380	0
CC1Cc2cc(F)ccc2N1C(=O)Cc1nc(N2CCOCC2)sc1C(=O)O	CHEMBL3125381	0
O=C(O)c1sc(N2CCOCC2)nc1CC(=O)N1CCc2c(Br)cccc21	CHEMBL3125383	0
CC1Cc2c(Br)cccc2N1C(=O)Cc1nc(N2CCOCC2)sc1C(=O)O	CHEMBL3125384	0
NC(=O)c1sc(N2CCOCC2)nc1CC(=O)N1CCc2ccccc21	CHEMBL3125385	0
NC(=O)c1sc(N2CCOCC2)nc1CC(=O)N1CCc2c(Cl)cccc21	CHEMBL3125389	0
NC(=O)c1sc(N2CCOCC2)nc1CC(=O)N1CCc2c(Br)cccc21	CHEMBL3125390	0
NC(=O)c1sc(N2CCOCC2)nc1CC(=O)N1CCc2cc(F)ccc21	CHEMBL3125391	0
CC1Cc2c(Cl)cccc2N1C(=O)Cc1nc(N2CCOCC2)sc1C(N)=O	CHEMBL3125394	0
CC1Cc2c(Br)cccc2N1C(=O)Cc1nc(N2CCOCC2)sc1C(N)=O	CHEMBL3125395	0
COc1ccc(C(=O)NC(C)Cc2ccccn2)cc1OC1CCN(C(C)C)CC1	CHEMBL3188567	0
CCCCc1ccc(C)c(N=CNO)c1	CHEMBL319862	0
CCCCCCOc1ccc(-n2ccnc2)cn1	CHEMBL320105	0
CCCCCCc1ccc(N=CNO)cc1	CHEMBL321051	0
COc1cc(N2CCN(C)CC2)ccc1-c1nc2ncc(Cl)c(N[C@H]3[C@@H](C(N)=O)[C@@H]4C=C[C@H]3C4)c2[nH]1	CHEMBL3218855	0
COc1cc(N2CCC(N3CCOCC3)CC2)ccc1-c1nc2ncc(Cl)c(N[C@H]3[C@@H](C(N)=O)[C@@H]4C=C[C@H]3C4)c2[nH]1	CHEMBL3218856	0
CN1CCN(c2cc(N3CCC[C@@H](C(=O)NCCc4ccc(C#N)nc4)C3)nc(C(F)(F)F)n2)CC1	CHEMBL3234571	0
COCCN(C)c1nc(N)c(CN)c(-c2ccc(Cl)cc2Cl)n1	CHEMBL324777	0
CC(C)C(O)(c1ccc2cc(-c3cccs3)ccc2c1)c1cn[nH]n1	CHEMBL3259868	0
Cc1nc2ccccc2c(-c2ccc3c4c(ccnc24)CCO3)c1[C@H](OC(C)(C)C)C(=O)O	CHEMBL3259907	0
Cc1cc(C)c(S(=O)(=O)N[C@@H](C)CNc2cccc3c2cnn3-c2ccc(F)cc2)c(C)c1	CHEMBL3261407	0
Cc1nn(C2CCCC2)c(C)c1S(=O)(=O)N[C@@H](C)CNc1cccc2c1cnn2-c1ccc(F)nc1	CHEMBL3261425	0
COc1cc2ccc(C(O)(c3cn[nH]c3)C(C)C)cc2cc1OC	CHEMBL3264596	0
COc1cc2ccc(C(O)(c3cn[nH]n3)C(C)C)cc2cc1OC	CHEMBL3264597	0
COc1cc2ccc(C(O)(c3nnc[nH]3)C(C)C)cc2cc1OC	CHEMBL3264598	0
COc1cc2ccc(C(O)(c3ccncn3)C(C)C)cc2cc1OC	CHEMBL3264603	0
CC(C)C(O)(c1ccc2cc(OC(F)F)c(OC(F)F)cc2c1)c1cn[nH]n1	CHEMBL3264605	0
CC(C)C(O)(c1ccc2cc(OCC(F)(F)F)c(OCC(F)(F)F)cc2c1)c1cn[nH]n1	CHEMBL3264606	0
CC(C)C(O)(c1ccc2cc(-c3cnco3)ccc2c1)c1cn[nH]n1	CHEMBL3264607	0
CC(C)C(O)(c1ccc2cc(OC(F)F)ccc2c1)c1cn[nH]n1	CHEMBL3264608	0
Cc1noc(C)c1-c1ccc(-c2nc(C)c([C@H](OC(C)(C)C)C(=O)O)c(-c3ccc(Cl)cc3)c2C)cc1	CHEMBL3287925	0
CC(Oc1ccc2nc(N)n(CC(O)c3ccc(C(F)(F)F)cc3Cl)c2n1)C(F)(F)F	CHEMBL3289813	0
Cn1c2c(c(=O)n1-c1ccccc1C(F)(F)F)[C@H]1CC[C@]2(C)C1(C)C	CHEMBL3291345	0
Cc1cc(C)nc(O[C@H](C(=O)O)[C@@]2(c3ccccc3)NCC(=O)N(Cc3c(F)cc(F)cc3F)c3ccccc32)n1	CHEMBL329477	0
CCc1nc2ccc(Cl)cn2c1C(=O)NCc1ccc(N2CCN(c3ccc(OC(F)(F)F)cc3)CC2)cc1	CHEMBL3298905	0
C[C@@H](c1ncncc1F)[C@](O)(Cn1ncnn1)c1ccc(F)cc1F	CHEMBL3309278	0
C[C@@H](c1ncncc1F)[C@](O)(Cn1cnnn1)c1ccc(F)cc1F	CHEMBL3310993	0
OC(Cn1cnnn1)(c1ccc(F)cc1F)C(F)(F)c1ccccn1	CHEMBL3310995	0
OC(Cn1cnnn1)(c1ccc(F)cc1F)C(F)(F)c1ccc(OCC(F)(F)F)cn1	CHEMBL3311221	0
OC(Cn1cnnn1)(c1ccc(F)cc1F)C(F)(F)c1ccc(-c2ccc(F)cc2)cn1	CHEMBL3311222	0
N#Cc1ccc(-c2ccc(C(F)(F)C(O)(Cn3cnnn3)c3ccc(F)cc3F)nc2)cc1	CHEMBL3311223	0
O[C@@](Cn1cnnn1)(c1ccc(F)cc1F)C(F)(F)c1ccc(-c2ccc(Cl)cc2)cn1	CHEMBL3311225	0
O[C@@](Cn1cnnn1)(c1ccc(F)cc1F)C(F)(F)c1ccc(-c2ccc(C(F)(F)F)cc2)cn1	CHEMBL3311226	0
O[C@@](Cn1cnnn1)(c1ccc(F)cc1F)C(F)(F)c1ccc(-c2ccc(OC(F)(F)F)cc2)cn1	CHEMBL3311227	0
O[C@@](Cn1cnnn1)(c1ccc(F)cc1F)C(F)(F)c1ccc(-c2ccc(OCC(F)(F)F)cc2)cn1	CHEMBL3311228	0
CCc1ncc(COC(=O)N[C@H](C(=O)N[C@@H](Cc2ccccc2)[C@H](O)CN2CCN(Cc3ccc(OC)c(OC)c3)C[C@H]2C(=O)NC(C)(C)C)C(C)C)s1	CHEMBL331186	0
COc1cnc2ccc(=O)n(CCN3CCN(c4nc5cc(C)c(C#N)cc5[nH]4)CC3)c2c1	CHEMBL3318998	0
Cn1cc(-c2cc(C(O)(C(F)(F)F)C(F)(F)F)cnc2N2CCN(S(=O)(=O)c3ccc(N)nc3)CC2)cn1	CHEMBL3319533	0
Nc1ccc(S(=O)(=O)N2CCN(c3ncc(C(O)(C(F)(F)F)C(F)(F)F)cc3-c3cccnc3)CC2)cn1	CHEMBL3319549	0
Cc1cc2c(NC(=O)N[C@@H]3CC(C)(C)Oc4c3ccc(C(F)(F)F)c4F)cccc2cn1	CHEMBL3326584	0
Cc1cc2c(NC(=O)N[C@@H]3CC(CF)(CF)Oc4ccc(F)cc43)cccc2cn1	CHEMBL3326586	0
Cc1cc2c(NC(=O)N[C@@H]3CC(CF)(CF)Oc4cc(Cl)ccc43)cccc2cn1	CHEMBL3326588	0
N#C[C@@H]1C[C@H](F)CN1C(=O)C[C@H](N)Cc1cc(F)c(F)cc1F	CHEMBL3330060	0
C/C=C/c1cc(OC)c(OC)cc1OC	CHEMBL333306	0
Clc1ccc(CN2CCO[C@H](CCc3ccccc3)C2)cc1	CHEMBL3335556	0
COc1ccc(CNC(=O)c2cc(-c3cncc(C)c3)ncc2-c2nccs2)nc1OC	CHEMBL3338865	0
N#C[C@@H]1C[C@@H]2C[C@@H]2N1C(=O)[C@@H](N)C12CC3CC(CC(C3)C1)C2	CHEMBL3350935	0
COc1nc(-c2nc(Nc3cc(C(F)(F)F)ccc3F)n(C)n2)ccc1-n1cnc(C)c1	CHEMBL3353099	0
CC(C)(CC(O)(Cc1cc2cc(S(C)(=O)=O)ncc2[nH]1)C(F)(F)F)c1ccccc1S(N)(=O)=O	CHEMBL3358945	0
CC(C)(CC(O)(Cc1cc2cc(S(C)(=O)=O)ncc2[nH]1)C(F)(F)F)c1ccc(Cl)cc1C(N)=O	CHEMBL3358947	0
CCS(=O)(=O)c1cc2cc(CC(O)(CC(C)(C)c3ccccc3C(N)=O)C(F)(F)F)[nH]c2cn1	CHEMBL3358949	0
CCS(=O)(=O)c1cc2cc(CC(O)(CC(C)(C)c3ccc(F)cc3C(N)=O)C(F)(F)F)[nH]c2cn1	CHEMBL3358950	0
CCS(=O)(=O)c1cc2cc(C[C@](O)(CC(C)(C)c3ccccc3C(N)=O)C(F)(F)F)[nH]c2cn1	CHEMBL3358953	0
OC(Cn1cnnn1)(c1ccc(F)cc1F)C(F)(F)c1ccc(Cl)cn1	CHEMBL3358962	0
C[C@@H](c1ncncc1F)[C@](O)(Cn1cnnc1)c1ccc(F)cc1F	CHEMBL3358963	0
O=C(O)c1ccccc1NC(=O)N1C[C@H]2C[C@@H](c3ccccc3C(F)(F)F)C[C@H]2C1	CHEMBL3359014	0
O=C(O)c1cc(F)ccc1NC(=O)N1C[C@H]2C[C@@H](c3ccccc3C(F)(F)F)C[C@H]2C1	CHEMBL3359017	0
O=C(O)c1cc(Cl)ccc1NC(=O)N1C[C@H]2C[C@@H](c3ccccc3C(F)(F)F)C[C@H]2C1	CHEMBL3359019	0
CS(=O)(=O)c1ccc(NC(=O)N2C[C@H]3C[C@@H](c4ccccc4C(F)(F)F)C[C@H]3C2)c(C(=O)O)c1	CHEMBL3359020	0
O=C(O)c1cnncc1NC(=O)N1C[C@H]2C[C@@H](c3ccccc3C(F)(F)F)C[C@H]2C1	CHEMBL3359024	0
CC(C)N1CCC[C@H]1CNC(=O)c1cn(C2CCCC2)c(=O)c2c1c1ccccc1n2C	CHEMBL3359272	0
CCOC(=O)c1[nH]cc2c1N=C1CCCC(=O)C1C2c1ccc(Sc2nc3ccc(F)cc3[nH]2)o1	CHEMBL3393473	0
CCOC(=O)c1[nH]cc2c1N=C1CCCC(=O)C1C2c1ccc(Sc2nc3ccc(F)c(F)c3[nH]2)o1	CHEMBL3393477	0
CCOC(=O)c1[nH]cc2c1N=C1CCCC(=O)C1C2c1ccc(Sc2nc3c(F)c(F)c(F)cc3[nH]2)o1	CHEMBL3393478	0
C[C@@H]1CC[C@@H](Oc2ccnc3c(F)cccc23)CN1C(=O)c1ccccc1-n1nccn1	CHEMBL3394842	0
COCCCOc1cc(C(=O)N(C[C@@H]2CNC[C@H]2NS(=O)(=O)CC2CCOCC2)C(C)C)ccc1OC	CHEMBL3400459	0
C[C@H]1OCCN(c2nc(-c3ccncc3F)cc(=O)n2C)[C@@H]1C	CHEMBL3401127	0
Cn1c(N2CCO[C@@H]3CCC[C@H]32)nc(-c2ccncc2F)cc1=O	CHEMBL3401129	0
Cn1c(N2CCO[C@@H]3CCCC[C@H]32)nc(-c2ccncc2F)cc1=O	CHEMBL3401131	0
Cn1c(N2CCO[C@@H]3COC[C@H]32)nc(-c2ccncc2F)cc1=O	CHEMBL3401132	0
CCO[C@@H]([C@H]1C[C@@H](C)[C@H]2[C@H](O1)[C@H](O)[C@@]1(C)[C@@H]3CC[C@H]4C(C)(C)[C@@H](O[C@H]5CN(CC6CN(C)C6)CCO5)CC[C@@]45C[C@@]35CC[C@]21C)C(C)(C)O	CHEMBL3403815	0
CCO[C@@H]([C@H]1C[C@@H](C)[C@H]2[C@H](O1)[C@H](O)[C@@]1(C)[C@@H]3CC[C@H]4C(C)(C)[C@@H](O[C@H]5CN(C6CN(C(C)C)C6)CCO5)CC[C@@]45C[C@@]35CC[C@]21C)C(C)(C)O	CHEMBL3403816	0
CCO[C@@H]([C@H]1C[C@@H](C)[C@H]2[C@H](O1)[C@H](O)[C@@]1(C)[C@@H]3CC[C@H]4C(C)(C)[C@@H](O[C@H]5CN(C6CN(C7CCC7)C6)CCO5)CC[C@@]45C[C@@]35CC[C@]21C)C(C)(C)O	CHEMBL3403817	0
CCO[C@@H]([C@H]1C[C@@H](C)[C@H]2[C@H](O1)[C@H](O)[C@@]1(C)[C@@H]3CC[C@H]4C(C)(C)[C@@H](O[C@H]5CN(CC6CN(C(C)C)C6)CCO5)CC[C@@]45C[C@@]35CC[C@]21C)C(C)(C)O	CHEMBL3403822	0
CCO[C@@H]([C@H]1C[C@@H](C)[C@H]2[C@H](O1)[C@H](O)[C@@]1(C)[C@@H]3CC[C@H]4C(C)(C)[C@@H](O[C@H]5CN(CC6CN(C7CCC7)C6)CCO5)CC[C@@]45C[C@@]35CC[C@]21C)C(C)(C)O	CHEMBL3403823	0
CCO[C@@H]([C@H]1C[C@@H](C)[C@H]2[C@H](O1)[C@H](O)[C@@]1(C)[C@@H]3CC[C@H]4C(C)(C)[C@@H](O[C@H]5CN(CC6CN(CC(C)(C)O)C6)CCO5)CC[C@@]45C[C@@]35CC[C@]21C)C(C)(C)O	CHEMBL3403826	0
CCO[C@@H]([C@H]1C[C@@H](C)[C@H]2[C@H](O1)[C@H](O)[C@@]1(C)[C@@H]3CC[C@H]4C(C)(C)[C@@H](O[C@H]5CN(CC6CN(CCO)C6)CCO5)CC[C@@]45C[C@@]35CC[C@]21C)C(C)(C)O	CHEMBL3403827	0
c1cncc(CCCNCCc2ccnc(-n3ccnc3)n2)c1	CHEMBL3407814	0
O=C1Nc2ccccc2[C@]12C[C@H]2c1ccc2c(/C=C/c3ccc(CN4CC[C@@H](F)C4)cc3)[nH]nc2c1	CHEMBL3408943	0
COc1ccc2c(c1)[C@]1(C[C@H]1c1ccc3c(/C=C/c4ccc(CN5C[C@H](C)O[C@H](C)C5)cc4)[nH]nc3c1)C(=O)N2C	CHEMBL3408948	0
COc1cccc(OC)c1[C@@H]1C[C@H](F)C(=O)N1Cc1ccc(OC(F)(F)F)cc1	CHEMBL3409855	0
COc1cccc(OC)c1[C@@H]1C[C@@H](O)C(=O)N1Cc1ccc(OC(F)(F)F)cc1	CHEMBL3409859	0
COc1cccc(OC)c1[C@@H]1C[C@@H](O)C(=O)N1Cc1ccc2oc3ccccc3c2c1	CHEMBL3409872	0
COc1cccc(F)c1[C@@H]1C[C@H](F)C(=O)N1Cc1ccc2oc3ccccc3c2c1	CHEMBL3409873	0
COc1cccc(F)c1C1C[C@@H](O)C(=O)N1Cc1ccc2oc3ccccc3c2c1	CHEMBL3409875	0
Cc1nc(-c2nnc3n2CCN(C(=O)c2ccc(F)cc2)[C@@H]3C)cs1	CHEMBL3422005	0
C[C@@H]1c2nnc(-c3csc(-c4ccccc4)n3)n2CCN1C(=O)c1ccc(F)cc1	CHEMBL3422006	0
CC(C)c1nc(-c2nnc3n2CCN(C(=O)c2ccc(-c4cccs4)cc2)[C@@H]3C)cs1	CHEMBL3422014	0
Cc1csc(-c2nnc3n2CCN(C(=O)c2ccc(-c4cccs4)cc2)[C@@H]3C)n1	CHEMBL3422016	0
COc1cccc(CC(=O)Nc2nc(-c3ccncn3)cs2)c1	CHEMBL3581137	0
COc1cccc(CC(=O)Nc2nc(-c3ccnc(N)c3)cs2)c1	CHEMBL3581140	0
CNc1cc(-c2csc(NC(=O)Cc3cccc(OC)c3)n2)ccn1	CHEMBL3581141	0
COc1ccc(S(=O)(=O)N2CCC[C@H]2C(=O)Nc2cc(C)cc(C)c2)cc1	CHEMBL3597952	0
O=C(O)c1cnc(N(C(=O)c2ccc(OCc3cccc(C(F)(F)F)c3)cc2)C2CCCCC2)s1	CHEMBL360033	0
COc1cc2c(cc1OC(C)C)[C@H](c1ccc(Cl)cc1)N(c1ccc(N(C)C[C@H]3CC[C@H](N4CCNC(=O)C4)CC3)cc1)C(=O)C2	CHEMBL3601397	0
COc1cc2c(cc1OC(C)C)[C@H](c1ccc(Cl)cc1)N(c1ccc(N(C)C[C@H]3CC[C@H](N4CCN(C)C(=O)C4)CC3)cc1)C(=O)C2	CHEMBL3601398	0
COc1cc2c(cc1OC(C)C)[C@H](c1ccc(Cl)cc1)N(c1ccc(N(C)C[C@H]3CC[C@H](N4CC(=O)N(C)C4)CC3)nc1)C(=O)C2	CHEMBL3601400	0
NCc1c(N)nc(-c2ccccc2)nc1-c1ccc(Cl)cc1Cl	CHEMBL36020	0
O=C(Nc1ccc(Cl)cc1Cl)c1cn[nH]n1	CHEMBL3604174	0
Cc1cc(NCc2ccccc2C(F)(F)F)c2cccc(C(N)=O)c2n1	CHEMBL3604713	0
Cc1cc(NCc2c(C)cccc2Cl)c2cccc(C(N)=O)c2n1	CHEMBL3604733	0
O=C1c2cc(-c3ccnc(N[C@@H]4C[C@H](O)[C@@H](F)C4)n3)cn2CCCN1[C@H](CO)c1ccccc1	CHEMBL3608458	0
Cc1nsc(-c2nnc3n2CCN(C(=O)c2ccc(F)cc2)[C@@H]3C)n1	CHEMBL3608680	0
Cc1nsc(-c2nnc3n2CCN(C(=O)c2ccccc2)[C@@H]3C)n1	CHEMBL3608740	0
CCn1cnc(-c2cccnc2)c1	CHEMBL361364	0
c1ccc(-c2nnc3n2-c2ccc(-c4cccnc4)cc2CC3)cc1	CHEMBL3622434	0
CC(=O)c1ccc(-c2cccnc2)s1	CHEMBL362702	0
O=S(=O)(NC[C@@H]1OCC[C@@]2(S(=O)(=O)c3ccc(Cl)cc3)c3c(F)ccc(F)c3OC[C@@H]12)C(F)(F)F	CHEMBL3627955	0
O=S(=O)(c1ccc(Cl)cc1)[C@@]12CCCC(CO)(CO)[C@@H]1COc1c(F)ccc(F)c12	CHEMBL3629736	0
Cn1c(Nc2cccc(C(C)(C)C)c2)nc2cc(Oc3ccnc(-c4ncc(C(F)(F)F)[nH]4)c3)ccc21	CHEMBL3632719	0
Cn1c(Nc2ccc(C(C)(C)C)cc2)nc2cc(Oc3ccnc(-c4ncc(C(F)(F)F)[nH]4)c3)ccc21	CHEMBL3632720	0
Cn1c(Nc2cc(C(F)(F)F)ccc2F)nc2cc(Oc3ccnc(-c4ncc(C(F)(F)F)[nH]4)c3)ccc21	CHEMBL3632723	0
C[C@@H](c1ccc(-c2ccn(C)c(=O)c2)cc1)N1CC[C@](CC(C)(C)C#N)(c2ccccc2)OC1=O	CHEMBL3639635	0
NCC1CCC(c2cccnc2)O1	CHEMBL3640764	0
O=NCc1ccc(-c2cccnc2)s1	CHEMBL3640786	0
CCn1nc(-c2ccc([C@H](C)N3CC[C@](CC(C)(C)O)(c4ccccc4)OC3=O)cc2)ccc1=O	CHEMBL3645513	0
C[C@@H](c1ccc(-c2ccc(=O)n(CC(F)(F)F)n2)cc1)N1CC[C@](CC(C)(C)O)(c2ccccc2)OC1=O	CHEMBL3645515	0
Cc1cc(-c2ccc([C@H](C)N3CC[C@](CC(C)(C)O)(c4ccccc4)OC3=O)cc2)nn(C)c1=O	CHEMBL3645516	0
C[C@@H](c1ccc(-c2ccc(=O)n(C3CC3)n2)cc1)N1CC[C@](CC(C)(C)O)(c2ccccc2)OC1=O	CHEMBL3645519	0
C[C@@H](c1ccc(-c2ccc(F)cc2)cc1)N1CC[C@](CCC(N)=O)(c2ccccc2)OC1=O	CHEMBL3645524	0
C[C@@H](c1ccc(OC(F)F)cc1)N1CC[C@](CCO)(c2ccc(F)cc2)OC1=O	CHEMBL3645527	0
CC(C)(C(=O)O)c1ccc(-c2ccc(C3CCCCC3)cc2)c(F)c1	CHEMBL364738	0
C[C@@H](c1ccc(-c2cc[nH]c(=O)c2)cc1)N1CC[C@](CC(C)(C)C#N)(c2ccccc2)OC1=O	CHEMBL3664643	0
C[C@@H](c1ccc(-c2ccc(=O)n(C)c2)cc1)N1CC[C@](CC(C)(C)C#N)(c2ccccc2)OC1=O	CHEMBL3664657	0
CC[C@@H](c1ccc(-c2ccc(=O)n(CC)c2)cc1)N1CC[C@](CC(C)(C)O)(c2ccccc2)OC1=O	CHEMBL3664659	0
CCn1cc(-c2ccc([C@H](C)N3CC[C@](CC(C)(C)O)(c4ccc(F)cc4)OC3=O)cc2)ccc1=O	CHEMBL3664668	0
C[C@@H](c1ccc(-c2ccn(CC(F)(F)F)c(=O)c2)cc1)N1CC[C@](CC(C)(C)O)(c2ccccc2)OC1=O	CHEMBL3664672	0
C[C@@H](c1ccc(-c2ccc(=O)n(CC(F)(F)F)c2)cc1)N1CC[C@](CC(C)(C)O)(c2ccccc2)OC1=O	CHEMBL3664673	0
CC(C)n1ccc(-c2ccc([C@H](C)N3CC[C@](CC(C)(C)O)(c4ccccc4)OC3=O)cc2)cc1=O	CHEMBL3664674	0
C[C@@H](c1ccc(-c2ccc(=O)n(C)c2)cc1)N1CC[C@](CC(C)(C)C#N)(c2ccc(F)cc2)OC1=O	CHEMBL3664675	0
CCn1cc(-c2ccc([C@H](C)N3CC[C@](CC(C)(C)O)(c4ccccc4)OC3=O)cc2)cc(C)c1=O	CHEMBL3664676	0
CCn1c(C)cc(-c2ccc([C@H](C)N3CC[C@](CC(C)(C)O)(c4ccccc4)OC3=O)cc2)cc1=O	CHEMBL3664677	0
C[C@@H](c1ccc(-c2ccn(C3CC3)c(=O)c2)cc1)N1CC[C@](CC(C)(C)O)(c2ccccc2)OC1=O	CHEMBL3664679	0
C[C@@H](c1ccc(-c2ccc(=O)n(CC3CC3)c2)cc1)N1CC[C@](CC(C)(C)O)(c2ccccc2)OC1=O	CHEMBL3664680	0
COC[C@]1(c2ccccc2)CCN([C@@H](C)c2ccc(-c3ccn(C)c(=O)c3)cc2)C(=O)O1	CHEMBL3664682	0
C[C@@H](c1ccc(-c2ccc(=O)n(C3CC3)c2)cc1)N1CC[C@](CC(C)(C)O)(c2ccccc2)OC1=O	CHEMBL3664694	0
C[C@@H](c1ccc(-c2ccc(=O)n(C(F)F)c2)cc1)N1CC[C@](CC(C)(C)O)(c2ccccc2)OC1=O	CHEMBL3664695	0
C[C@@H](c1ccc(-c2ccn(C(F)F)c(=O)c2)cc1)N1CC[C@](CC(C)(C)O)(c2ccccc2)OC1=O	CHEMBL3664696	0
C[C@@H](c1ccc(-c2ccn(CCF)c(=O)c2)cc1)N1CC[C@](CC(C)(C)O)(c2ccccc2)OC1=O	CHEMBL3664707	0
C[C@@H](c1ccc(-c2ccc(=O)n(C)c2)cc1)N1CC[C@](CC(C)(C)O)(c2ccccc2)OC1=O	CHEMBL3664715	0
COc1cc2cnc(C(O)(c3cn[nH]n3)C(C)C)cc2cc1OC	CHEMBL3689756	0
OC(Cn1cnnc1)(c1ccc(F)cc1F)C(F)(F)c1ccc2cc(Br)ccc2n1	CHEMBL3699081	0
OC(Cn1cnnc1)(c1ccc(F)cc1F)C(F)(F)c1cnc2cc(Cl)ccc2n1	CHEMBL3699082	0
C=CCN1CC(=O)N2[C@@H](Cc3ccc(O)cc3)C(=O)N(Cc3cccc4c(C(=O)Nc5ccc(N6CCCCC6)nc5)cn(C)c34)C[C@@H]2N1C(=O)NCc1ccccc1	CHEMBL3699315	0
C=CCN1CC(=O)N2[C@@H](Cc3ccc(O)cc3)C(=O)N(Cc3cccc4c(-c5ccc(C(=O)Nc6cccc(C(N)=O)c6)cc5)cn(C)c34)C[C@@H]2N1C(=O)NCc1ccccc1	CHEMBL3699323	0
C=CCN1CC(=O)N2[C@@H](Cc3ccc(O)cc3)C(=O)N(Cc3cccc4c(-c5ccc(C(=O)Nc6cccc(OCc7ccccc7)c6)cc5)cn(C)c34)C[C@@H]2N1C(=O)NCc1ccccc1	CHEMBL3699327	0
C=CCN1CC(=O)N2[C@@H](Cc3ccc(O)cc3)C(=O)N(Cc3cccc4c(-c5ccc(C(=O)Nc6ccc(OC)cc6)cc5)cn(C)c34)C[C@@H]2N1C(=O)NCc1ccccc1	CHEMBL3699329	0
C=CCN1CC(=O)N2[C@@H](Cc3ccc(O)cc3)C(=O)N(Cc3cccc4c(-c5ccc(C(=O)Nc6cccc(OC(C)C)c6)cc5)cn(C)c34)C[C@@H]2N1C(=O)NCc1ccccc1	CHEMBL3699332	0
C=CCN1CC(=O)N2[C@@H](Cc3ccc(O)cc3)C(=O)N(Cc3cccc4c(-c5ccc(NC(=O)CCCCCCC)cc5)cn(C)c34)C[C@@H]2N1C(=O)NCc1ccccc1	CHEMBL3699341	0
C=CCN1CC(=O)N2[C@@H](Cc3ccc(O)cc3)C(=O)N(Cc3cccc4c(-c5ccc(NC(=O)NCCc6ccccc6)cc5)cn(C)c34)C[C@@H]2N1C(=O)NCc1ccccc1	CHEMBL3702676	0
C=CCN1CC(=O)N2[C@@H](Cc3ccc(O)cc3)C(=O)N(Cc3cccc4c(-c5ccc(NC(=O)N6CCOCC6)nc5)cn(C)c34)C[C@@H]2N1C(=O)NCc1ccccc1	CHEMBL3702681	0
C=CCN1CC(=O)N2[C@@H](Cc3ccc(O)cc3)C(=O)N(Cc3cccc4c(-c5ccc(NC(=O)NCc6ccccc6)nc5)cn(C)c34)C[C@@H]2N1C(=O)NCc1ccccc1	CHEMBL3702684	0
C=CCN1CC(=O)N2[C@@H](Cc3ccc(O)cc3)C(=O)N(Cc3cccc4c(C(=O)N5CCN(C)CC5)cn(C)c34)C[C@@H]2N1C(=O)NCc1ccccc1	CHEMBL3702690	0
C=CCN1CC(=O)N2[C@@H](Cc3ccc(O)cc3)C(=O)N(Cc3cccc4c(C(=O)N5CCN(CCCO)CC5)cn(C)c34)C[C@@H]2N1C(=O)NCc1ccccc1	CHEMBL3702695	0
C=CCN1CC(=O)N2[C@@H](Cc3ccc(O)cc3)C(=O)N(Cc3cccc4c(C(=O)N5CCN(C(C)=O)CC5)cn(C)c34)C[C@@H]2N1C(=O)NCc1ccccc1	CHEMBL3702698	0
C=CCN1CC(=O)N2[C@@H](Cc3ccc(O)cc3)C(=O)N(Cc3cccc4c(C(=O)N5CCN(S(C)(=O)=O)CC5)cn(C)c34)C[C@@H]2N1C(=O)NCc1ccccc1	CHEMBL3702699	0
C=CCN1CC(=O)N2[C@@H](Cc3ccc(O)cc3)C(=O)N(Cc3cccc4c(C(=O)N5CCN6CCN(C(C)=O)CC6C5)cn(C)c34)C[C@@H]2N1C(=O)NCc1ccccc1	CHEMBL3702709	0
C=CCN1CC(=O)N2[C@@H](Cc3ccc(O)cc3)C(=O)N(Cc3cccc4c(C(=O)N5CCN6CCN(C=O)CC6C5)cn(C)c34)C[C@@H]2N1C(=O)NCc1ccccc1	CHEMBL3702712	0
C=CCN1CC(=O)N2[C@@H](Cc3ccc(O)cc3)C(=O)N(Cc3cccc4c(C(=O)N5CCC(O)CC5)cn(C)c34)C[C@@H]2N1C(=O)NCc1ccccc1	CHEMBL3702714	0
C=CCN1CC(=O)N2[C@@H](Cc3ccc(O)cc3)C(=O)N(Cc3cccc4c(C(=O)N5CC(O)C5)cn(C)c34)C[C@@H]2N1C(=O)NCc1ccccc1	CHEMBL3702726	0
C=CCN1CC(=O)N2[C@@H](Cc3ccc(O)cc3)C(=O)N(Cc3cccc4c(C(=O)N5CC(N6CCC(OC)CC6)C5)cn(C)c34)C[C@@H]2N1C(=O)NCc1ccccc1	CHEMBL3702729	0
C=CCN1CC(=O)N2[C@@H](Cc3ccc(O)cc3)C(=O)N(Cc3cccc4c(C(=O)NCCCO)cn(C)c34)C[C@@H]2N1C(=O)NCc1ccccc1	CHEMBL3702732	0
C=CCN1CC(=O)N2[C@@H](Cc3ccc(O)cc3)C(=O)N(Cc3cccc4c(C(=O)NCCOCCO)cn(C)c34)C[C@@H]2N1C(=O)NCc1ccccc1	CHEMBL3702735	0
C=CCN1CC(=O)N2[C@@H](Cc3ccc(O)cc3)C(=O)N(Cc3cccc4c(C(=O)NCCCN(C)C)cn(C)c34)C[C@@H]2N1C(=O)NCc1ccccc1	CHEMBL3702740	0
C=CCN1CC(=O)N2[C@@H](Cc3ccc(O)cc3)C(=O)N(Cc3cccc4c(C(=O)N[C@H](C)C(=O)OC)cn(C)c34)C[C@@H]2N1C(=O)NCc1ccccc1	CHEMBL3702742	0
C=CCN1CC(=O)N2[C@@H](Cc3ccc(O)cc3)C(=O)N(Cc3cccc4c(C(=O)NCCN5CCN(C)CC5)cn(C)c34)C[C@@H]2N1C(=O)NCc1ccccc1	CHEMBL3702748	0
C=CCN1CC(=O)N2[C@@H](Cc3ccc(O)cc3)C(=O)N(Cc3cccc4c(C(=O)NN5CCCC5)cn(C)c34)C[C@@H]2N1C(=O)NCc1ccccc1	CHEMBL3702758	0
C=CCN1CC(=O)N2[C@@H](Cc3ccc(O)cc3)C(=O)N(Cc3cccc4c(C(=O)NN5CCOCC5)cn(C)c34)C[C@@H]2N1C(=O)NCc1ccccc1	CHEMBL3702760	0
C=CCN1CC(=O)N2[C@@H](Cc3ccc(O)cc3)C(=O)N(Cc3cccc4c(C(=O)Nc5ccc(OC(C)(C)C)cc5)cn(C)c34)C[C@@H]2N1C(=O)NCc1ccccc1	CHEMBL3702772	0
C=CCN1CC(=O)N2[C@@H](Cc3ccc(O)cc3)C(=O)N(Cc3cccc4c(C(=O)Nc5ccc(OCCN(C)C)nc5)cn(C)c34)C[C@@H]2N1C(=O)NCc1ccccc1	CHEMBL3702774	0
C=CCN1CC(=O)N2[C@@H](Cc3ccc(O)cc3)C(=O)N(Cc3cccc4c(C(=O)Nc5ccc(OCCCN(C)C)nc5)cn(C)c34)C[C@@H]2N1C(=O)NCc1ccccc1	CHEMBL3702775	0
C=CCN1CC(=O)N2C(CN(Cc3cccc4c(C(=O)Nc5ccc(N6CCOCC6)nc5)cn(C)c34)C(=O)[C@@H]2Cc2ccc(O)cc2)N1C(=O)NCc1ccccc1	CHEMBL3702789	0
C=CCN1CC(=O)N2[C@@H](Cc3ccc(O)cc3)C(=O)N(Cc3cccc4c(C(=O)Nc5ccc(N6CCN(C7CCCC7)CC6)nc5)cn(C)c34)C[C@@H]2N1C(=O)NCc1ccccc1	CHEMBL3702801	0
C=CCN1CC(=O)N2C(Cc3ccc(O)cc3)C(=O)N(Cc3cccc4c(C(=O)Nc5ccc(N6CCN(c7ccc(C(F)(F)F)cc7)CC6)nc5)cn(C)c34)CC2N1C(=O)NCc1ccccc1	CHEMBL3702808	0
C=CCN1CC(=O)N2C(Cc3ccc(O)cc3)C(=O)N(Cc3cccc4c(C(=O)Nc5ccc(N6CCN(Cc7ccc(OC)cc7)CC6)nc5)cn(C)c34)CC2N1C(=O)NCc1ccccc1	CHEMBL3702810	0
C=CCN1CC(=O)N2[C@@H](Cc3ccc(O)cc3)C(=O)N(Cc3cccc4c(C(=O)Nc5ccc(N6CCCN(C)CC6)nc5)cn(C)c34)C[C@@H]2N1C(=O)NCc1ccccc1	CHEMBL3702817	0
C=CCN1CC(=O)N2C(CN(Cc3cccc4c(-c5ccc(S(C)(=O)=O)cc5)cn(C)c34)C(=O)[C@@H]2Cc2ccc(O)cc2)N1C(=O)NCc1ccccc1	CHEMBL3702822	0
CC(C)c1nc(COC(=O)N[C@H](C(=O)N[C@@H](Cc2ccccc2)[C@H](O)CN2CCN(Cc3cccc4c3COC4)C[C@H]2C(=O)NC(C)(C)C)C(C)C)cs1	CHEMBL3706711	0
NC(=O)Cn1c(=O)c(CCO)c(-c2cc(Cl)ccc2O)c2cc(C(F)(F)F)ccc21	CHEMBL371409	0
O=S(=O)(N[C@H]1CC[C@@](c2cc(F)ccc2F)(S(=O)(=O)c2ccc(Cl)cc2)CC1)C(F)(F)F	CHEMBL372199	0
CC1(C)CCC(c2ccc(-c3ccc(C4(C(=O)O)CC4)cc3F)cc2)CC1	CHEMBL372751	0
O=C(O)C1(c2ccc(-c3ccc(-c4ccc(O)cc4)c(F)c3)c(F)c2)CC1	CHEMBL372846	0
CC(C)c1nc(C(=O)NC2CCN(CC3CC3)CC2)c2ccccn12	CHEMBL3739470	0
CC(C)c1nc(C(=O)NC[C@H]2[C@@H]3CN(CC4CCOCC4)C[C@H]23)c2ccccn12	CHEMBL3739647	0
O=C([C@@H]1COC(c2nc3cc(C(F)(F)F)cc([N+](=O)[O-])c3s2)=N1)N1CCCC1	CHEMBL3739863	0
COC(=O)N1CCC(CN2C[C@H]3[C@H](CNC(=O)c4nc(C(C)C)n5ccccc45)[C@H]3C2)CC1	CHEMBL3740669	0
CC(C)c1nc(C(=O)NC2CCN(CCF)CC2)c2ccccn12	CHEMBL3740908	0
CC(C)c1nc(C(=O)NC[C@H]2[C@@H]3CN(CC(C)(C)O)C[C@H]23)c2ccccn12	CHEMBL3741377	0
COCCN1CCN(C(=O)c2nc3cc(C(F)(F)F)c(C)c([N+](=O)[O-])c3s2)CC1	CHEMBL3741545	0
CC(C)c1nc(C(=O)NC[C@H]2[C@@H]3CN(CC(C)(C)F)C[C@H]23)c2ccccn12	CHEMBL3741595	0
CC(C)c1nc(C(=O)NCC2CCN(CC3CCOCC3)CC2)c2ccccn12	CHEMBL3741608	0
COCCCN1CCC(NC(=O)c2nc(C(C)C)n3ccccc23)CC1	CHEMBL3741776	0
COCCCN1CCC(CNC(=O)c2nc(C(C)C)n3ccccc23)CC1	CHEMBL3741821	0
COCCN1CCN(C(=O)c2nc3cc(C(F)(F)F)cc([N+](=O)[O-])c3s2)CC1	CHEMBL3742122	0
Cc1cc2nc(NCCCO)n(CC(=O)c3cc(C(C)(C)C)c(O)c(C(C)(C)C)c3)c2cc1C	CHEMBL374350	0
NOCc1cccc(Cl)c1	CHEMBL3765807	0
Cc1nc2c([N+](=O)[O-])c(Cl)c(Cl)cc2n1Cc1ccc(B2OC(O)=CN(C)C=C(O)O2)cc1	CHEMBL3771105	0
C[N+]1([O-])CCC2(CC1)C(=O)Nc1cc(/C=C3\c4ccccc4COc4cc(F)ccc43)ccc12	CHEMBL3774852	0
O=C(O)CCN1CCC2(CC1)C(=O)Nc1cc(/C=C3\c4ccccc4COc4cc(F)ccc43)ccc12	CHEMBL3775464	0
CCn1c(CCC(=O)Nc2ccc(C)cc2C)nnc1CCC1CCCCC1	CHEMBL3775930	0
CC(C)(C)[C@@H](O)C(=O)N1C[C@@H]2C[C@@H]2[C@H]1C(=O)NCc1cc(Cl)ccc1-n1cnnn1	CHEMBL3785476	0
CC1(C)CCC(C)(C)c2cc(C3(c4ccc(/C=C/C(=O)O)cc4)OCCO3)ccc21	CHEMBL3786581	0
O=C(NCc1cc(Cl)ccc1-n1cnnn1)[C@@H]1CC=NN1C(=O)[C@H](O)c1ccccc1	CHEMBL3787458	0
CCc1cnc(Oc2ccc(NC(=O)c3ncccc3N)cc2Cl)nc1	CHEMBL3798517	0
COc1ccccc1COCCCOc1ccc(N2C(=O)CNC[C@@H]2CSc2ccc3c(c2)N(CC(=O)O)C(=O)CO3)cc1	CHEMBL380360	0
Nc1cccc(-c2cccc(-c3c(-c4ccc(O)cc4)n[nH]c3N)c2)c1	CHEMBL3806115	0
COc1ccccc1COCCCOc1ccc(N2C(=O)CNC[C@@H]2COc2ccc3c(c2)N(CC(=O)O)C(=O)CO3)cc1	CHEMBL381076	0
CC(C)(C)OC(=O)NCCCCCC(=O)NCc1cccnc1	CHEMBL3814075	0
CC(C)(C)OC(=O)N[C@H](CSCCC(=O)NCc1cccnc1)CC1CCCCC1	CHEMBL3814345	0
NCCCCCC(=O)NCc1cccnc1	CHEMBL3814729	0
CCOC1(c2ccc(OC)cc2)SC=C(C)n2c1noc2=O	CHEMBL3818643	0
CCOC1(c2ccccc2)SC=C(C)n2c1noc2=O	CHEMBL3819185	0
Cc1cc(-c2cnn3c(NCC4CCOCC4)nc(NC4CCCC4)nc23)ccc1C(=O)NC1CC1	CHEMBL3819637	0
COc1ccccc1COCCCOc1ccc(N2C(=O)CNC[C@@H]2COc2ccc3c(c2)N(CCC(=O)O)CCC3)cc1	CHEMBL382144	0
COc1cccc(-c2nc(OC)c3ccccc3n2)c1	CHEMBL3822473	0
COc1cccc(-c2nc(SC)c3ccccc3n2)c1	CHEMBL3822867	0
Cc1nn(C2CCN(C(=O)[C@@H](C)O)CC2)c(C)c1Nc1ncc(Cl)c(-c2cnn3ccccc23)n1	CHEMBL3823030	0
Cc1cc(C2C=CNC=N2)c(C)s1	CHEMBL3823354	0
C[C@]12CC[C@H]3[C@@H](CCC4=CC(=O)CC[C@@]43C)[C@@H]1CC[C@@H]2O	CHEMBL386630	0
O=C(NCC1(O)CCCCC1)c1cnc(Nc2cccc(Cl)c2)nc1C(F)(F)F	CHEMBL387620	0
CC(=O)N1CCC(C(=O)N2C[C@H](c3ccc(F)cc3C)[C@@H](C(=O)N(C)C(C)(C)c3cc(C(F)(F)F)cc(C(F)(F)F)c3)C2)CC1	CHEMBL391615	0
CC(=O)N1CCC(C(=O)N2C[C@H](c3ccccc3)[C@@H](C(=O)N(C)Cc3cc(C(F)(F)F)cc(C(F)(F)F)c3)C2)CC1	CHEMBL391963	0
CC(=O)N1CCC(C(=O)N2C[C@H](c3ccc(F)cc3C)[C@@H](C(=O)N(C)Cc3cc(C(F)(F)F)cc(C(F)(F)F)c3)C2)CC1	CHEMBL391964	0
CC(=O)N1CCC(C(=O)N2C[C@H](c3ccc(F)cc3C)[C@@H](c3nc(C(C)(C)c4cc(C(F)(F)F)cc(C(F)(F)F)c4)no3)C2)CC1	CHEMBL392463	0
CC(=O)N1CCC(C(=O)N2C[C@@H](c3nc(C(C)(C)c4cc(C(F)(F)F)cc(C(F)(F)F)c4)no3)[C@H](c3ccc(F)cc3C)C2)CC1	CHEMBL392464	0
CC(=O)N1CCC(C(=O)N2C[C@H](c3ccc(F)cc3C)[C@@H](c3noc(C(C)(C)c4cc(C(F)(F)F)cc(C(F)(F)F)c4)n3)C2)CC1	CHEMBL392465	0
CN(C)c1ccc(-c2nc3ncc(Cl)c(N4CCN(CC(=O)Nc5nccs5)CC4)c3[nH]2)cc1	CHEMBL392525	0
COc1cc2c(cc1O)-c1cc3ccc(OC)c(OC)c3c[n+]1CC2	CHEMBL400345	0
O=C(O)C1(c2ccc(-c3ccc(-c4ccc(F)cc4)c(F)c3)c(F)c2)CC1	CHEMBL427548	0
CN1CCCC1c1cccnc1	CHEMBL440464	0
COc1ccc(CN2CCN(C[C@@H](O)[C@H](Cc3ccccc3)NC(=O)[C@@H](NC(=O)OCc3csc(C)n3)C(C)C)[C@H](C(=O)NC(C)(C)C)C2)cc1OC	CHEMBL442398	0
C[C@@H](O[C@H]1CC[C@@H]2CN(C3=CC(=O)CC3)C[C@H]2[C@@H]1c1ccc(F)cc1)c1cc(C(F)(F)F)cc(C(F)(F)F)c1	CHEMBL447955	0
C=C(O)C(=O)c1cc(OC)c(OC)cc1OC	CHEMBL450829	0
COc1ccc2cc(-c3cnccc3N)ccc2c1	CHEMBL453169	0
O=C(/C=C/c1cc(F)cc(F)c1)N1CCC([C@@H](CO)N2CCC(c3c[nH]c4ncccc34)CC2)CC1	CHEMBL455683	0
Cc1cc(C2CCN(CCCF)CC2)cc2[nH]c(-c3c(NCCn4cc(Cl)cn4)cc[nH]c3=O)nc12	CHEMBL459729	0
COC1CCc2cc(-c3cccnc3)ccc2C1	CHEMBL460178	0
Cc1cc(C2CCN(CCO)CC2)cc2[nH]c(-c3c(NCCn4cc(Cl)cn4)cc[nH]c3=O)nc12	CHEMBL460996	0
COCCN1CCC(c2cc(C)c3nc(-c4c(NCCn5cc(Cl)cn5)cc[nH]c4=O)[nH]c3c2)CC1	CHEMBL460997	0
Cc1cc(C2CCN(C)CC2)cc2[nH]c(-c3c(NC[C@@H](O)c4cccc(Cl)c4)cc[nH]c3=O)nc12	CHEMBL461198	0
Cc1cc(C2CCN(C)CC2)cc2[nH]c(-c3c(NCCn4cc(Cl)cn4)cc[nH]c3=O)nc12	CHEMBL461422	0
COCCN1CCC(c2cc(C)c3nc(-c4c(NC[C@@H](O)c5cccc(Cl)c5)cc[nH]c4=O)[nH]c3c2)CC1	CHEMBL468671	0
Cc1cc(C2CCN(CCCF)CC2)cc2[nH]c(-c3c(NC[C@@H](O)c4cccc(Cl)c4)cc[nH]c3=O)nc12	CHEMBL468672	0
COc1ccc([C@H](O)CNc2cc[nH]c(=O)c2-c2nc3c(C)cc(C4CCN(CCCF)CC4)cc3[nH]2)cc1Cl	CHEMBL469292	0
CC(=O)O[C@H]1[C@H](Oc2c(-c3ccc(O)cc3)oc3cc(O)cc(O)c3c2=O)O[C@@H](C)[C@H](O)[C@H]1O	CHEMBL469431	0
CC1=CCC(C)(C)C=CC(=O)C(C)=C[C@H](O)C1	CHEMBL469850	0
CC(=O)O[C@H]1[C@H](Oc2c(-c3ccc(O)cc3)oc3cc(O)cc(O)c3c2=O)O[C@@H](C)[C@H](O)[C@H]1OC(C)=O	CHEMBL469851	0
CC(=O)O[C@@H]1[C@@H](O)[C@H](C)O[C@@H](Oc2c(-c3ccc(O)cc3)oc3cc(O)cc(O)c3c2=O)[C@@H]1O	CHEMBL470048	0
CC(=O)O[C@H]1[C@H](C)O[C@@H](Oc2c(-c3ccc(O)cc3)oc3cc(O)cc(O)c3c2=O)[C@H](O)[C@@H]1O	CHEMBL470049	0
CCCCC[C@H](O)CC(=O)CCc1ccc(OC)c(O)c1	CHEMBL471072	0
CC(=O)O[C@H]1[C@H](C)O[C@@H](Oc2c(-c3ccc(O)cc3)oc3cc(O)cc(O)c3c2=O)[C@H](OC(C)=O)[C@@H]1O	CHEMBL471074	0
C[C@H]1CN(Cc2ccc(CCC(=O)N3CCC(Nc4cccc(F)c4)CC3)cc2)CCN1	CHEMBL474130	0
C[C@H]1CN(Cc2ccc(CC(=O)N3CCC(Nc4ccc(F)cc4)CC3)cc2)C[C@@H](C)N1	CHEMBL474934	0
COc1cccc(S(=O)(=O)n2ccc3cc4c(cc32)CCNCC4)c1	CHEMBL477386	0
O=S(=O)(c1ccccn1)n1ccc2cc3c(cc21)CCNCC3	CHEMBL477387	0
Cc1ccn(-c2ccc(C(=O)N3CCC(F)(F)/C(=C\C(=O)NCCO)c4ccccc43)c(Cl)c2)n1	CHEMBL478283	0
O=S(=O)(c1cccc(Cl)c1)n1cc(Cl)c2cc3c(cc21)CCNCC3	CHEMBL478870	0
Cn1cc(S(=O)(=O)c2ccccc2)c2cc3c(cc21)CCNCC3	CHEMBL478871	0
COc1cc(C[C@H]2COC(=O)[C@@H]2Cc2cc(OC)c(OC)c(OC)c2)cc(OC)c1OC	CHEMBL479314	0
COc1cc(C[C@H]2COC(O)[C@@H]2Cc2cc(OC)c(OC)c(OC)c2)cc(OC)c1OC	CHEMBL480296	0
COc1cc(OC)c(OC)cc1CC(C)=O	CHEMBL481233	0
CC(C)CC(=O)c1c(O)cc(O)cc1O[C@@H]1O[C@H](CO)[C@@H](O)[C@H](O)[C@H]1O	CHEMBL484029	0
C[C@H]1CN(Cc2ccc(CC(=O)N3CCC(Nc4cccc(C#N)c4)CC3)cc2)CCN1	CHEMBL489480	0
Cc1ccc2c(N)noc2c1-c1ccc2c(N3CCOC[C@@H]3C)nncc2c1	CHEMBL494916	0
CCNc1noc2c(-c3ccc4c(N5CCOC[C@@H]5C)nncc4c3)c(C)ccc12	CHEMBL495493	0
Nc1nccc(Oc2ccc(NC(=O)NC(=O)Cc3ccc(F)cc3)cc2F)c1C#Cc1ccccn1	CHEMBL500422	0
CC1=C[C@@H](O)[C@@]23O[C@]2(C)C[C@@H]2OC(=O)C(C)=C2C[C@@H]13	CHEMBL501119	0
CC1=C[C@H](O)C[C@@]2(C)O[C@@H]2CC(C)(C)C=CC1=O	CHEMBL503727	0
CC1=CCC[C@@]2(C)O[C@@H]2CC(C)(C)C=CC1=O	CHEMBL512339	0
COc1cc([C@H]2OC[C@@H]3C(c4cc(OC)c(O)c(OC)c4)OC[C@H]23)ccc1O	CHEMBL513023	0
CC1=C[C@H](O)C[C@]2(C)O[C@@H]2CC(C)(C)C=CC1=O	CHEMBL513372	0
O=C(O)c1cccc(Cc2cc(Cl)ccc2OCc2ccc(F)cc2Cl)n1	CHEMBL513491	0
O=S(=O)(c1ccccc1)n1cc(Cl)c2cc3c(cc21)CCNCC3	CHEMBL515624	0
O=S(=O)(c1ccccc1)n1ccc2cc3c(cc21)CCNCC3	CHEMBL517828	0
CC(=O)O[C@H]1[C@H](C)O[C@@H](Oc2c(-c3ccc(O)cc3)oc3cc(O)cc(O)c3c2=O)[C@H](OC(C)=O)[C@@H]1OC(C)=O	CHEMBL519761	0
Cc1ccn(-c2ccc(C(=O)N3CCC(F)(F)/C(=C\C(=O)NCc4ccccn4)c4ccccc43)c(Cl)c2)n1	CHEMBL528996	0
COc1ccc(NS(=O)(=O)c2sc3ccc(Cl)cc3c2C)cc1N1CCNCC1	CHEMBL542139	0
O=C(NC1CCN(Cc2ccn(-c3ccc(C(F)(F)F)cc3)c2)CC1)N[C@H](CO)c1ccccc1	CHEMBL557329	0
CN([C@@H]1CCc2c(c3ccccn3c2CC(=O)O)C1)S(=O)(=O)c1ccc(F)cc1	CHEMBL564845	0
COc1cnc2c(NCc3nnc4ccc(-c5cc(F)c(F)c(F)c5)nn34)ccnc2c1	CHEMBL565843	0
COc1ccc2c(NCc3nnc4ccc(-c5ccccc5)nn34)ccnc2c1	CHEMBL566683	0
COc1cnc2c(NCc3nnc4ccc(-c5ccccc5)nn34)ccnc2c1	CHEMBL566875	0
COc1c(C(C)(C)C)cc(C(=O)Cn2c(NCCCO)nc3cc(C)c(C)cc32)cc1C(C)(C)C	CHEMBL590750	0
C[C@@H](NC(=O)c1ccc2c(c1)nc(-c1ccoc1)n2C1CCCCC1)C(=O)Nc1ccc(/C=C/C(=O)O)cc1	CHEMBL590850	0
COCCCNc1nc2cc(C)c(C)cc2n1CC(=O)c1cc(C(C)(C)C)c(O)c(C(C)(C)C)c1	CHEMBL600058	0
COc1ccc(C(=O)NCc2cccc(C(=O)Nc3ccc(CN(C)C)cc3)c2)cc1C	CHEMBL604249	0
O=C1CCc2cc(-c3cccnc3)ccc2N1	CHEMBL62811	0
C[C@@H](c1ncncc1F)[C@](O)(Cn1cncn1)c1ccc(F)cc1F	CHEMBL638	0
Clc1ccccc1CN1CCc2sccc2C1	CHEMBL833	0
Cc1cc(C)cc(O[C@H](C(=O)O)[C@@]2(c3ccccc3)NCC(=O)N(Cc3c(F)cc(F)cc3F)c3ccccc32)c1	CHEMBL96347	0
O=C(CCCCCCC(=O)Nc1ccccc1)NO	CHEMBL98	0
